# Supplementary material for: Association of serum osmolality levels with all-cause mortality risk in patients with DKA
Source: Research Square preprint supplement (doi:10.21203/rs.3.rs-5869644/v1), 2025-04-28
Supplement: Supplementary file 1 [file e75326fccd8a055e13ce94b5.xlsx]

## Sheet: Sheet1
Age	Gender	T	HRbpm	SBPmmHg	DBPmmHg	Spo2%	WBCK/uL	PlateletK/uL	Hemoglobing/dL	Sodiummol/L	Potassiummol/L	Glucosemg/dL	Ureanitrogenmg/dL	Creatinine	Serum osmolality	PH	Lactatemmol/L	AniongapmEq/L	SOFA	APSIII	SAPSII	GCS	Charlson	DM2	DM1	Sepsis	Hypertension	Heartfailure	AMI	Stroke	COPD	CKD	AKI	AKIstage	CRRT	Ventilation	insulin	Balance	Hospday	ICUday	DEAD
40	2	36.78	106	117	80	100	5.7	166	8	138	3.6	2440	10	1	422.327	7.32	0.9	23	2	42	16	14	4	1	0	0	0	0	0	0	0	1	1	1	0	0	0	3663.51	3.61	1.15	0
40	1	36.28	125	148	42	100	30.6	83	14.1	164	4.4	588	147	6.9	421.967	7.3	4.3	31	11	105	57	13	2	1	0	1	0	0	0	0	0	0	1	3	1	1	0	8186.3	9.51	7.64	1
59	2	37	81	100	85	100	6.8	107	11.8	163	4.1	960	77	4.4	415.033	7.11	2.6	24	15	92	49	15	2	1	0	1	1	0	0	0	0	0	1	3	1	1	1	11476.4	2.14	2.47	1
24	2	37.17	147	174	150	95	27.6	331	15.1	168	4.4	779	56	3	408.078	7.41	3.5	31	22	158	66	3	1	1	0	1	0	0	0	0	0	0	1	3	1	1	1	8738.62	1.3	1.3	1
37	2	35.67	115	111	74	94	16.2	296	15.2	152	4.3	1093	88	3.9	404.751	7.37	2.8	24	4	68	29	13	1	0	1	0	0	0	0	0	0	0	1	2	0	0	0	5543.86	7.39	2.26	0
63	2	36.89	125	113	76	92	9	262	13.2	169	5.3	525	71	2.1	403.124	7.27	4.2	36	7	50	49	15	3	1	0	1	1	0	0	0	0	0	1	2	0	1	0	6040.44	13.61	3.9	0
65	2	36.78	93	138	90	95	6.8	141	16.3	152	4.2	943	105	3.7	402.289	7.19	2.7	22	6	73	40	12	9	1	0	1	0	0	0	0	0	1	1	3	0	0	0	3769.22	14.16	4.15	0
51	2	39.17	100	107	61	92	19.2	263	15.8	149	4.7	1205	69	5.1	398.987	7.34	3.8	22	15	74	62	8	6	1	0	1	0	0	0	0	0	1	1	2	0	1	1	8324.19	10.8	3.79	0
47	2	39.17	136	106	61	97	8.3	230	15.5	159	2.6	1016	53	2.5	398.573	7.26	3.7	17	16	110	81	5	1	0	1	1	1	0	0	0	0	0	1	3	0	1	1	12625.9	11.79	8.83	0
35	2	37.11	114	114	62	28	13	267	12.8	139	4	1476	67	4.5	391.929	7.31	1.3	37	7	87	31	6	1	0	1	0	0	0	0	0	0	0	0	0	0	0	0	6977.59	5.33	4.47	0
43	2	36.72	84	106	87	100	17.9	265	14.7	160	5	709	61	2.4	391.175	7.4	2	13	7	57	45	13	1	1	0	1	1	0	0	0	0	0	1	1	0	1	0	2917.9	7.73	2.79	0
68	2	37.5	92	104	68	100	20.3	241	9.2	163	3.9	499	78	1.7	389.379	7.29	2.2	17	8	73	43	15	7	1	0	1	0	0	0	0	0	0	1	3	0	1	1	6036.94	11.09	1.69	1
80	1	37.06	104	108	94	100	11.1	146	11.4	158	4.2	450	111	5.2	389.043	7.27	2.4	18	13	70	53	15	9	1	0	1	0	0	0	0	0	1	1	3	1	1	1	5550.18	13.57	11.45	1
71	2	36.83	106	138	85	98	7.3	215	14.2	162	3.5	638	63	2.5	388.944	7.27	3.1	21	6	74	61	8	9	1	0	1	0	1	0	0	0	1	1	3	0	1	0	2967.2	41.55	34.62	0
69	2	35.28	120	147	73	100	23	445	6.1	131	5	987	169	5.9	387.19	7.39	1.9	20	6	54	41	14	6	1	0	1	0	0	0	0	0	1	0	0	0	0	0	551.16	6.23	1.75	0
23	2	36.78	121	131	81	99	16.0643	237.356	13.0343	161	4.2	501	72	2.6	383.948	7.37	1.8	22	4	53	17	15	1	1	0	0	0	0	0	0	0	0	0	0	0	0	1	6487.31	9.16	3.91	0
77	2	36.67	80	169	80	96	11.7	146	11.9	152	4.9	814	58	2.5	379.737	7.26	2.4	21	6	44	36	15	8	1	0	0	0	0	0	1	0	1	1	1	0	0	0	9519.39	5.73	2.79	0
51	1	37	128	131	88	97	3.5	127	12.6	170	2.5	380	38	1.2	379.683	7.41	3.5	17	4	54	40	13	2	1	0	0	1	0	0	0	0	0	1	2	0	0	0	7698.33	14.79	2.96	0
59	1	36.5	74	124	43	99	11.1	176	14.1	173	3.1	259	33	1.1	378.375	7.4	2.30827	24	4	77	25	14	2	0	1	0	0	0	0	0	0	0	0	0	0	0	1	3100.82	7.31	3.14	0
71	2	36.56	101	128	62	99	12.1	163	12.8	156	4.2	600	68	2.6	378.019	7.22	2.9	29	4	49	36	14	6	1	0	0	1	0	0	1	0	0	0	0	0	0	1	5343.47	6.1	1.79	0
77	2	36.44	95	111	52	97	12.3	253	12.9	137	5.5	914	107	6.3	373.992	7.31	4.8	31	9	59	55	13	9	0	1	1	0	1	1	0	0	1	1	2	0	0	1	4868.08	19.05	3.19	0
66	2	37.28	165	105	78	100	14.4	173	14.3	160	3.2	445	62	2.2	373.265	7.29	3.4	20	11	76	54	13	6	1	0	1	1	0	1	0	0	0	1	2	0	1	1	7457.73	30.76	13.98	1
75	1	36.39	103	123	86	94	20.1	305	12.4	165	3.2	364	46	1.2	373.051	7.26	5.3	17	5	80	51	6	5	0	0	0	1	0	0	0	0	0	0	0	0	0	0	4428.87	4.26	2.05	1
41	2	36.39	108	146	97	100	19	211	13.9	139	6.5	1060	63	2.9	372.389	7.25056	2.935	43	3	60	33	13	1	1	0	0	1	0	0	0	0	0	0	0	0	0	0	5898.3	5.79	2.69	0
51	2	36.94	122	73	53	100	9.2	127	17	146	3.7	905	63	3.2	372.178	7.19	2.1	29	12	84	54	15	5	1	0	1	0	0	0	1	0	0	1	3	0	1	1	12428.7	13.67	8.71	0
73	2	37.28	58	125	69	96	4.2	133	11.8	165	4.2	292	47	1.9	371.408	7.29	4.7	16	12	84	60	15	5	1	0	1	1	0	0	0	0	0	1	3	1	1	1	5102.93	10.24	10.14	1
72	1	36.61	83	152	68	99	8.3	235	7.6	169	4	128	50	1.3	370.968	7.36	1.2	9	2	50	46	15	10	1	0	1	0	0	0	0	0	0	1	2	0	0	0	1827.63	11.76	2.8	1
70	2	37.44	90	159	88	98	5.4	99	8	149	5.8	440	99	4.6	369.402	7.22	1.4	25	6	41	51	13	6	0	1	1	0	0	0	0	0	1	1	1	0	0	0	2769.53	14.09	1.05	1
79	1	36.39	61	142	61	99	11.4	124	9.6	153	3.7	324	99	2.5	366.757	7.32	1.8	10	8	60	48	11	8	1	0	1	1	0	0	0	0	0	1	2	0	0	1	5217.24	6.79	3.77	0
51	2	36.67	109	159	116	96	11.6	223	16.1	156	3.7	584	41	2	366.487	7.41	2.7	14	7	60	30	13	3	1	0	0	0	0	0	0	0	0	0	0	0	0	1	7329.2	9.08	1.78	0
73	1	36.61	101	121	46	95	20.5	247	8.7	156	3.9	60	118	4.4	365.276	7.29	2.6	15	9	68	56	8	4	0	0	1	1	0	0	0	0	0	1	1	0	0	1	4484.06	6	2.64	0
50	2	37.11	123	130	92	96	10.1	144	12.9	148	5.6	788	40	2.2	365.263	7.21	2.66379	37	2	58	32	15	3	1	0	0	0	0	0	0	0	0	1	2	0	0	0	6156.76	5.06	2.01	0
52	1	36.94	104	139	78	100	11	266	13.7	169	3.4	252	18	0.7	365.229	7.41	2.8	16	1	53	22	15	2	1	0	0	1	0	0	0	0	0	0	0	0	0	1	118.12	4.94	1.09	0
57	2	36.67	101	108	48	97	17.2	339	7.4	135	5.9	907	92	3.6	365.046	7.06	2.6	37	11	77	54	9	6	0	1	1	0	1	0	0	0	0	1	3	1	0	1	12946.6	17.63	5.86	1
50	1	37.06	135	140	107	100	8.3	184	10.9	165	3.4	324	28	1.2	364.8	7.52	2.8	18	3	53	39	13	3	1	0	0	1	0	0	0	0	0	1	2	0	0	1	7299.74	6.21	1.94	0
61	2	36.44	85	133	64	100	25.5	381	11.6	147	3.2	670	76	3.4	364.765	7.33	4.6	21	8	55	36	15	9	0	1	1	0	1	0	0	0	1	1	1	0	1	0	4998.03	11.1	3.79	0
79	1	37.17	99	98	71	100	4.5	166	8.1	161	3.7	174	70	1.6	364.067	7.25	4	22	16	115	80	7	7	1	0	1	0	0	0	1	0	1	1	3	0	0	1	4436.39	1.26	1.37	1
71	2	37.56	120	96	68	100	20.6	254	10.7	148	3.8	469	96	4.5	363.941	7.17	12.5	31	11	84	67	15	11	1	0	1	0	0	0	0	0	1	1	3	0	1	1	6443.18	30.85	5.96	1
61	2	36.72	78	143	44	100	13.9	220	8.9	137	5.1	700	112	8.5	363.089	7.11	1.1	39	7	59	45	10	8	0	1	0	1	0	1	0	0	0	1	3	0	0	0	6438.72	47.67	1.94	1
65	2	37	93	89	52	93	5.3	112	9.3	131	4.6	1125	81	11.3	362.629	7.15	5.3	38	13	91	59	15	9	0	1	1	0	0	0	0	0	1	1	3	1	0	1	8559.03	19.12	10.89	1
74	2	36.11	95	103	60	80	2.7	198	13	133	3.7	1246	55	2.4	362.265	7.17	5.7	21	12	66	55	15	6	0	0	1	1	1	0	0	0	0	1	2	0	1	1	5917.45	15.8	13.08	0
64	1	36.33	85	161	110	95	10.8	191	7.3	137	3.8	220	190	4.1	361.679	7.36	1.6	23	5	55	32	14	8	0	1	0	0	1	0	0	0	1	1	2	0	0	1	938.36	8.74	1.34	1
69	2	36.67	121	150	127	99	27.6	264	12.1	144	4.1	423	114	3	360.414	7.23	4.4	28	14	139	83	6	11	1	0	1	0	1	0	0	0	1	1	3	0	0	1	9199.66	5.3	1.32	1
53	2	36.56	132	122	76	97	18.8	190	14.4	155	4.6	252	75	2.1	359.986	7.38	4.5	16	4	69	36	14	2	1	0	1	1	0	0	0	0	0	1	1	0	0	0	9231.32	11.99	5.25	1
69	1	36.17	94	154	79	100	20.4	162	11.3	152	4.1	560	46	2.2	359.74	7.23	3.3	18	10	75	64	8	9	1	0	0	0	0	0	0	0	0	0	0	0	1	1	6745.47	10.37	3.33	1
60	2	38.5	123	97	70	100	11.5	128	7.8	154	3.6	302	76	1.8	359.121	7.3	3	18	12	74	54	15	3	0	0	1	1	0	0	0	0	0	1	2	0	1	1	5640.22	7.1	6.94	1
58	2	36.06	97	134	107	95	10.5	152	14.2	156	4.3	433	39	1.8	358.584	7.35323	2.06165	20	4	53	25	14	2	1	0	0	0	0	0	0	0	0	1	2	0	0	1	7782.65	3.03	1.9	0
74	2	36.94	73	100	68	98	13.8	250	9.7	157	4	310	53	1.5	358.151	7.37	1.4	18	2	56	35	15	9	1	0	1	0	1	1	0	1	0	0	0	0	0	1	2328.29	13.96	2.36	1
79	2	36.11	87	123	88	97	12	193	11.9	163	2.6	216	41	2.1	357.843	7.42	4	12	6	68	46	9	6	0	0	1	0	0	0	0	0	0	1	1	0	0	0	4485.81	9.08	2.77	0
43	1	37.22	93	128	75	100	7.4	181	6.2	143	4	517	97	3.5	357.365	7.38	1.7	25	5	42	27	15	7	0	1	1	0	1	1	0	0	1	1	3	0	1	1	156.52	10.85	9.78	1
80	2	36.44	118	134	79	94	4	181	12.7	154	3.8	484	40	1.6	356.775	7.29	4.3	20	3	60	56	13	13	0	0	1	0	1	0	1	1	0	1	3	0	0	1	3818.58	9.04	1.87	0
57	1	34.94	85	92	62	100	16.7	187	9.6	145	3.1	812	43	2	356.668	7.22	6.7	28	6	67	45	15	5	0	1	1	1	0	0	0	0	0	1	1	0	1	0	6716.72	7.25	3.11	0
53	1	38.11	106	167	81	100	9.4	129	5.3	115	4.84262	2010	13	0.9	355.995	7.3	0.9	3	8	38	30	14	3	1	0	1	1	0	0	0	0	0	1	2	0	1	0	4900.97	3.97	2.67	0
64	2	36.67	81	129	65	100	15.4	257	10.2	137	4.2	954	56	2.7	355.4	7.23	6	27	11	53	40	14	5	0	1	0	1	0	1	0	0	0	1	1	0	0	1	4810.45	8.24	3.13	0
54	2	35.56	83	154	71	100	12.9	219	9.2	137	5.4	834	66	4	354.705	7.21	3.7	23	11	103	64	3	5	0	1	1	0	1	0	0	0	1	1	2	0	1	0	3715.03	16.73	16.73	0
67	2	37.33	106	178	91	96	19	299	12.9	147	5.2	480	63	1.5	353.567	7.41	1.8	18	6	72	43	15	8	1	0	1	0	0	0	1	0	1	1	2	0	1	1	3528.11	17.77	17.77	1
60	2	36.56	75	131	78	98	2.7	555	7.6	134	9.8	685	78	2.3	353.513	7.17	1.8	24	2	46	32	15	7	1	0	1	0	0	0	0	0	1	0	0	0	0	1	2634.68	8.08	1.37	1
65	2	36.83	104	99	59	95	18.4	378	7.8	148	4	235	100	4.1	352.77	7.33	3.9	14	10	87	56	6	6	1	0	1	0	0	0	1	0	1	1	3	0	0	0	1776.78	16.87	4.04	1
64	1	36.78	85	179	52	99	15.1	297	13.3	157	4.6	281	39	1.4	352.74	7.4	2.33896	16	4	43	27	14	6	1	0	0	1	0	1	0	0	0	0	0	0	0	1	1363.97	8.45	1.36	0
48	1	36.89	113	114	53	98	8.6	226	12.6	154	3.7	465	32	1.3	352.662	7.39	1.3	25	6	108	61	3	1	0	1	1	1	0	0	0	0	0	0	0	0	1	0	5125.17	3.72	3.03	0
54	2	35.72	65	110	71	100	12.2	236	8.2	154	2.9	535	24	1.6	352.094	7.3	8.7	23	5	58	34	11	3	0	1	0	1	0	0	0	0	0	0	0	0	0	1	3560.62	15.68	1.71	1
62	2	38.5	94	154	79	100	11.3	318	8	146	4.9	405	75	2.7	351.086	7.5	1	17	3	58	36	15	8	0	1	1	0	1	0	1	0	1	1	2	0	1	1	2509	10.47	4.5	1
74	1	36.44	91	137	65	94	11.5	161	6.3	130	4.1	986	78	3.3	350.835	7.38	2.55962	15	5	54	48	13	10	1	0	1	0	1	0	0	0	1	1	2	0	0	0	3059.8	24.68	1.36	1
50	2	35.61	71	91	55	100	21.4	425	12.5	134	3.5	1158	30	3.3	350.048	7.13	3.9	48	6	67	43	11	3	0	0	1	0	1	0	0	0	0	0	0	0	0	0	6007.36	18.25	6.59	0
50	2	36.72	130	126	77	95	30.6	199	13.6	154	4.1	277	49	1.4	349.089	7.43	1.8	17	3	60	32	13	1	0	1	0	1	0	0	0	1	0	0	0	0	0	0	5382.18	3.21	1.54	1
75	1	37.11	75	146	80	92	9.9	185	12.5	159	3.7	246	27	0.9	348.71	7.41	2.6	15	8	72	54	6	6	0	0	0	0	1	0	0	0	0	1	1	0	0	0	2558.89	6.66	2.95	0
66	1	36.89	96	143	67	98	13.4	121	11	155	3.7	165	60	1.4	347.995	7.34	1.4	17	3	56	36	13	5	1	0	1	1	0	0	1	0	0	0	0	0	0	0	3545.1	12.04	1.86	0
64	1	37.67	106	143	65	94	8	189	10.1	150	4.5	268	67	1.8	347.817	7.39	0.8	18	4	47	36	13	7	1	0	1	0	0	0	0	0	1	0	0	0	0	0	3991	6.79	1.64	0
35	1	37.06	113	147	75	100	12.3	365	10.3	144	3.9	413	80	5.1	347.316	7.28	2.3	26	4	45	18	15	4	0	1	0	0	0	0	0	0	1	1	1	0	0	0	3479.15	5.4	5.42	0
66	1	36.67	94	108	29	100	11.3	228	9.3	138	5.6	724	55	1.4	347.065	7.2	1.8	29	6	58	42	15	8	0	1	1	1	1	1	0	0	0	1	2	0	1	0	2786.11	7.41	7.49	1
70	1	36.5	68	109	57	98	12.6	245	13.1	148	4.8	444	47	1.7	347.052	7.35	2.06991	18	4	48	35	14	3	1	0	0	1	0	0	1	0	0	0	0	0	0	1	3624.34	3	1.22	0
72	1	35.94	120	135	84	95	8.2	93	12.4	150	5.9	332	47	1.4	347.03	7.37	3.1	11	4	80	42	9	5	1	0	0	1	0	0	0	0	0	1	2	0	0	0	8712.39	16.52	1.75	0
37	1	36.28	110	118	63	100	16.9	277	9.5	142	4.6	563	63	3.4	346.978	7.25	2.6	30	5	61	23	14	2	0	1	1	0	0	0	0	0	0	1	1	0	0	0	4661.17	7.51	3.44	0
57	2	38.17	98	214	100	92	11.4	162	9.4	138	5.2	621	72	10.8	346.614	7.3	2.2	19	7	56	46	8	6	1	0	1	0	1	0	1	0	1	1	1	0	0	0	2710.34	7.97	2.06	0
61	2	36.89	103	158	70	95	12.7	253	9	142	4.9	375	89	7.1	346.419	7.36	1.4	25	6	56	37	14	7	1	0	1	0	0	0	0	0	1	1	3	0	0	1	1602.22	14.41	4.51	0
71	2	36.83	89	155	100	95	21.4	263	12.6	147	4.6	308	71	3.4	345.668	7.37	2.6	18	5	47	42	13	10	1	0	0	0	0	0	0	1	1	0	0	0	0	0	4155.38	5.6	1.89	0
64	2	37.67	89	131	73	98	11.2	197	13.2	150	3.8	519	25	0.7	345.362	7.28	3.3	13	4	45	32	7	4	1	0	1	1	0	0	0	0	0	1	2	0	0	1	8857.14	6.86	2.93	0
57	2	37.28	103	117	72	100	14.3	48	12.1	155	4.2	327	24	1	345.138	7.31	2.5	11	9	38	22	15	3	0	0	1	1	0	0	0	0	0	1	1	0	1	1	4544.97	5.78	3.12	1
64	1	36.44	106	175	75	100	11.5	245	7	132	5.4	795	73	2.8	345.038	7.11	1.9	34	3	46	32	14	8	0	1	1	0	1	0	1	0	1	1	1	0	0	0	3359.64	9.7	1.85	1
59	2	36.61	64	133	60	100	10.2	208	12.2	141	5.1	229	112	8	344.922	7.33782	1.7383	19	5	57	40	15	7	0	1	0	0	1	0	0	0	0	1	3	0	0	1	589.57	7.72	4.99	1
54	2	35.5	76	112	51	100	8.7	204	8.8	128	4.5	797	98	11	344.278	7.26	4.8	39	8	100	67	7	13	0	1	1	0	0	0	0	0	0	1	3	0	1	0	4297.21	12.99	4.06	1
48	2	36.72	78	154	86	93	9	143	12.1	141	5	713	35	1.5	344.111	7.34	1.4	9	5	51	30	12	1	0	0	0	1	0	0	0	0	0	1	2	0	0	1	5188.93	4.84	1.66	0
56	1	36.44	52	125	76	100	18.4	358	9	149	3.6	386	48	1.9	343.787	7.38	2.7	18	9	60	37	15	5	1	0	1	0	0	0	0	0	1	1	2	0	1	1	6441.32	12.07	2.03	1
28	1	36.44	134	108	58	99	12.4	331	10.5	142	5	523	58	2	343.77	7.18	1.5	30	3	47	25	15	0	0	1	0	0	0	0	0	0	0	0	0	0	0	0	3900.37	3.13	1.95	0
60	1	37.06	102	127	74	98	11.1	62	11.7	137	4	515	92	1	343.468	7.31	5	13	10	42	34	13	5	1	0	1	0	0	0	0	0	0	0	0	0	1	0	3472.11	7.75	1.81	0
34	2	36.61	102	184	136	77	6.7	248	6.6	117	6.7	1383	53	6.9	343.162	7.3	1.1	18	7	55	22	14	7	0	1	1	1	1	1	0	0	0	1	3	0	0	1	1222.34	5.41	1.5	0
22	2	36.94	90	119	80	100	9.9	200	12.1	156	4.4	216	28	1.5	342.8	7.42	1.49623	18	3	47	18	14	1	0	1	0	0	0	0	0	0	0	0	0	0	0	0	6274.85	5.14	2.05	0
49	1	37.06	77	140	75	100	12.8	235	13.4	153	4	280	37	1.2	342.77	7.42	1.7	21	2	44	30	15	1	1	0	0	1	0	0	0	0	0	1	2	0	0	1	5323.65	4.98	1.95	0
46	1	39.56	100	149	78	91	3.9	130	10	122	6.2	738	127	12.4	342.757	7.4	2.24905	32	8	66	44	10	4	0	1	1	0	0	0	0	0	0	1	1	0	0	0	2948.75	4.49	2.61	0
71	2	36.33	59	181	66	100	11.8	208	10	132	5.4	670	86	2.9	342.737	7.29	3.9	20	3	61	46	15	7	0	1	1	0	0	0	0	0	1	0	0	0	0	0	1449.91	5.92	1.75	1
68	2	36.72	95	149	95	98	13.2	335	8.3	136	4.6	284	128	2.9	342.692	7.33	1	20	2	49	36	15	8	1	0	0	0	0	0	0	0	1	0	0	0	0	1	24.8	3.5	1.57	0
67	2	35.78	84	105	50	100	16.7	276	9.5	136	5.2	693	61	2.2	342.686	7.1	2.4	29	11	110	70	3	8	0	1	1	0	0	0	0	0	1	1	3	0	0	0	3889.72	4.86	4.86	1
62	2	37.33	80	129	65	100	17.6	156	11.9	137	4	748	53	1.5	342.484	7.4	2.4	16	8	49	38	13	6	1	0	1	1	0	1	0	0	0	0	0	0	0	1	4029.76	6.04	2.2	0
69	1	36.78	105	123	69	100	0.3	34	8.7	148	2.6	317	66	2.4	342.383	7.28	5.4	19	13	85	71	11	12	1	0	1	1	0	0	0	0	0	1	2	0	0	1	6867.78	6.12	5.81	1
21	1	36.33	116	95	56	100	13.3	280	9.4	109	2.6	2085	9	0.8	342.248	7.11	0.6	16	5	55	35	14	0	0	1	0	0	0	0	0	0	0	0	0	0	0	0	5682.09	7.48	2.68	0
64	1	36.22	142	131	75	98	8.8	202	10.5	155	4.6	285	19	0.9	341.819	7.14	2.1	24	2	73	33	15	3	1	0	0	1	0	0	0	0	0	0	0	0	0	0	5373.19	3.16	1.71	1
72	1	36.11	94	86	58	100	10.4	204	10.1	152	3.3	327	35	1.1	341.267	7.3	5.2	17	7	88	52	6	5	1	0	1	1	0	0	0	0	0	1	1	0	0	1	1546.46	7.14	4.45	0
38	2	37.33	103	160	104	100	11.8	255	7.7	133	4.3	1039	25	1.9	341.251	7.36	4.2	24	5	65	23	8	2	0	1	1	0	0	0	0	0	0	0	0	0	0	0	2433.73	14.53	2.46	0
49	1	36.5	111	136	58	98	9	174	11.3	144	4	572	37	1.7	340.992	7.26	2.20713	31	3	47	30	12	3	0	1	1	0	0	1	0	0	0	1	2	0	0	0	5229.6	7.64	2.97	0
68	2	36.61	91	173	86	97	19.5	304	9.4	143	4.7	302	79	2.3	340.392	7.33	2.5	13	2	37	30	15	6	1	0	0	0	1	1	0	0	0	0	0	0	0	1	2859.74	8.08	1.03	0
50	1	37.17	92	130	79	100	36.7	388	7.7	121	3.8	1267	57	8.6	340.346	7.04	11.5	31	9	78	54	15	5	0	1	1	0	0	0	0	0	1	1	3	1	1	0	6798.9	25.48	16.75	1
69	1	36.56	74	135	58	96	11.3	182	10	140	4.4	484	69	2.6	340.332	7.37	3.8	16	4	41	39	13	7	0	1	1	0	0	1	0	0	1	1	2	0	0	0	4621.08	1.68	1.71	1
58	2	36.33	107	157	87	98	15	210	11.6	136	4.7	108	148	8.3	340.257	7.39	1.73532	27	5	45	32	14	2	1	0	1	1	0	0	0	0	0	0	0	0	0	1	1503.76	6.95	1.12	0
69	1	36.94	85	137	59	100	19	181	11.5	135	4.5	814	44	2.1	339.937	7.12	3.7	27	6	57	39	13	3	0	0	0	1	0	0	0	0	0	1	2	0	0	0	5758.87	9.31	5.97	0
70	1	36.22	100	122	56	96	13.4	180	12.8	131	3.9	790	73	2.3	339.76	7.29	4.3	33	4	48	51	13	11	1	0	1	1	0	0	0	0	0	1	3	0	0	1	5105.6	12.82	1.08	1
71	1	37.72	87	111	42	100	10	159	9.6	140	5.3	334	85	2.9	339.513	7.39	1.7356	16	4	61	46	13	7	0	0	1	0	1	0	0	0	1	1	1	0	0	1	11.51	24.84	1.96	0
60	2	36.94	93	100	47	97	16.8	292	10.5	131	5.2	950	39	1.8	339.106	7.3	4.7	45	6	74	44	9	2	0	1	0	0	0	0	0	0	0	0	0	0	0	1	2797.94	9	2.04	0
65	2	36.61	96	131	56	100	11.9	128	11.4	140	4.8	227	103	5.8	338.997	7.36	2.6	22	10	77	46	11	7	0	1	1	0	0	0	0	0	1	1	3	0	0	0	3554.09	17.79	4.52	1
73	2	36.44	85	86	49	95	15.9	107	14.6	143	4.2	165	99	3.2	338.924	7.19	2.9	22	6	49	47	13	11	1	0	0	0	1	0	0	1	1	0	0	0	0	0	7194.3	14.46	5.28	0
57	1	36.94	102	127	51	96	20.3	237	10.1	154	3.2	97	53	1.9	338.717	7.38	1.2	14	4	48	30	14	5	0	1	1	1	0	0	0	0	0	0	0	0	0	1	3181.8	5.38	1.05	0
57	1	36.78	125	139	90	100	14.4	191	13.3	150	3.4	465	17	1.1	338.705	7.23	2.1	25	6	57	36	12	2	0	1	0	1	0	0	0	0	0	0	0	0	0	0	4431.72	3.62	1.61	0
18	1	37.89	143	103	56	100	24.9	298	10.3	141	6.3	556	37	1.6	338.703	7.15401	2.01704	30	3	82	32	15	1	0	1	0	0	0	0	0	0	0	0	0	0	0	0	6197.11	1.41	1.35	0
48	2	36.78	97	120	70	100	29.9	339	9.6	146	4	435	40	1.3	338.452	7.25	2.3	20	3	47	31	13	5	1	0	1	0	1	0	0	0	1	0	0	0	0	1	4481.79	5.24	1.1	0
52	2	37.72	106	110	73	87	19.5	194	10.9	141	6.2	416	58	2.3	338.225	7.34	2.4	13	8	48	53	15	5	1	0	1	1	0	1	0	0	0	1	3	1	1	1	3861.62	26.06	7.01	0
76	1	37.06	84	108	89	100	9.2	185	11	133	5.1	711	63	2	338.2	7.25	3.6	16	9	55	44	15	9	1	0	1	0	1	0	0	0	1	1	2	0	0	1	168.22	10.16	2.09	0
60	2	36.94	116	145	112	96	20.2	142	8.5	143	4.3	250	83	4.2	338.132	7.36	1.2	19	9	44	36	15	4	1	0	1	1	0	0	0	1	0	1	3	0	1	1	-86.36	17.75	9.98	0
61	2	37.44	95	122	60	100	31.1	196	11.4	144	6.4	247	66	3.5	338.094	7.21	1.3	21	12	43	42	15	5	0	1	1	1	0	0	0	0	0	1	2	0	0	1	7276.39	8.78	6.04	0
39	2	36.94	111	114	76	100	19.1	210	13.7	142	3.8	425	64	2.4	338.068	7.38	2.1	15	6	58	18	15	3	0	1	0	1	0	0	0	0	0	1	1	0	0	1	4458.8	4.78	1.88	0
76	2	36.67	76	144	41	95	14.7	251	10.2	132	4.4	808	57	2.6	338.046	7.4	4.5	21	11	52	35	13	10	1	0	1	0	1	1	0	1	1	0	0	0	1	1	2186.34	5.82	2.65	0
62	2	36.5	90	169	50	98	7.5	139	10.8	145	3.6	322	64	4.3	337.946	7.34	2.3	19	13	112	66	3	6	1	0	1	0	0	0	0	0	1	1	3	0	0	1	5752.27	20.23	7.12	0
57	1	36.11	112	76	39	100	0.3	71	11.9	127	3	946	71	3.9	337.913	6.95	3.2	25	19	167	104	3	2	1	0	1	0	0	0	0	0	0	1	3	0	0	1	13162.6	1.1	1.17	1
79	1	36.78	97	125	71	100	14.6	201	11.9	148	5.8	330	33	0.9	337.719	7.37	2.3	13	10	43	40	15	7	1	0	1	1	0	0	0	0	0	1	1	0	1	1	4789.48	7.19	3.17	1
68	2	36.44	114	125	56	100	17.9	163	12.2	137	4.4	734	39	2	337.506	7.23	3.7	38	4	59	35	14	4	0	1	0	1	0	0	0	0	0	1	3	0	0	1	5706.27	8.74	2.66	1
73	2	38	65	109	71	97	10.2	216	7.5	137	4.7	365	94	4.3	337.249	7.24	1.8	18	12	105	68	3	7	1	0	1	0	0	0	0	0	1	1	3	0	1	1	-3233.34	23.91	10.51	1
70	2	37.06	86	131	40	97	14.4	218	10	140	4.7	379	75	4.7	337.241	7.32	1	29	7	49	34	15	9	0	1	1	0	1	1	0	0	0	1	3	0	1	1	3151.1	14.1	12.82	0
66	2	36.5	60	110	61	95	10.9	107	11.3	146	4.2	346	49	1.4	337.122	7.28	2.2	25	3	51	44	15	5	0	1	0	1	0	0	0	0	0	0	0	0	0	1	5633.9	4.18	1.37	0
24	1	36.44	108	38	19	90	4.1	71	7.1	154	3.6	319	11	1.2	336.851	7.02	27	42	11	96	54	15	2	0	1	1	0	0	0	0	0	0	1	2	0	1	0	12052.2	1.73	1.85	1
43	2	36.61	65	151	85	98	7.1	192	13.7	144	5.6	298	59	2	336.827	7.3	2.18073	19	3	36	28	14	3	1	0	0	0	0	0	0	0	1	1	2	0	0	1	4917.67	1.5	1.66	0
55	1	36.83	89	144	56	96	24.7	220	8.2	137	5	242	110	15	336.73	7.27	2	30	10	85	69	8	5	0	1	0	0	0	0	0	0	1	1	1	0	1	1	445.6	3.94	2.14	0
78	2	36.33	81	127	89	88	13.1215	194.864	9.97391	140	5.5	224	93	4.8	336.659	7.27	1.7	20	7	57	67	15	15	1	0	1	0	1	1	0	0	1	1	3	0	0	0	3228.14	12.84	1.92	1
48	2	37.06	88	163	63	100	12.1	101	11.9	148	3.8	127	72	4.3	336.37	7.35	1.1	18	5	33	26	15	5	0	1	1	1	0	0	0	0	0	0	0	0	0	0	965.1	6.97	4.8	0
75	2	36.06	118	96	47	100	23.3	181	10.7	142	3.9	589	33	1.9	336.308	7.22	4	23	4	68	43	14	7	1	0	1	1	0	1	0	1	0	1	1	0	0	1	12124.5	8.66	1.7	0
56	2	36.89	78	112	50	100	21.3	338	10.8	153	3.4	86	52	1.7	336.149	7.27	2.2	10	4	43	41	13	2	0	0	0	1	0	0	0	0	0	0	0	0	0	1	558.75	12.02	1.87	1
73	2	36.39	110	104	64	98	13.1	332	13.6	143	4.5	406	51	1.3	335.77	7.24	2.5	36	3	52	37	14	8	1	0	1	0	1	0	0	0	1	0	0	0	0	1	7551.65	4.21	2.07	0
61	2	36.33	97	103	56	94	29.6	193	13.6	126	5	807	81	3.6	335.762	7.1	1.6	29	10	49	40	15	3	0	1	1	1	0	1	0	0	0	0	0	0	0	1	8246.52	4.72	2.11	0
64	1	37	112	99	70	98	15.2	106	9	147	3.2	301	52	1.5	335.694	7.21	2.6	28	5	64	55	10	10	1	0	1	0	0	0	0	0	0	1	2	0	0	1	3998.5	39.92	2.05	0
48	2	37.22	135	109	67	98	5.6	44	5.6	142	4	587	31	1.7	335.683	7.31	18	34	12	69	38	15	4	1	0	1	1	0	0	0	0	0	1	3	1	0	0	14185.5	16.84	3.76	0
73	1	36.33	63	130	49	99	11.5	75	8.4	135	5.1	664	51	1.2	335.303	7.18	1.3	12	4	49	47	15	9	1	0	1	0	1	0	0	0	1	1	2	0	0	0	635.65	30.94	5.03	1
50	2	36.56	102	140	90	97	17.1	278	13.6	136	3.7	682	50	1.9	335.146	7.18	1.3	28	5	57	37	13	4	1	0	1	1	0	0	0	0	0	1	1	0	0	0	6141.05	7.8	2.83	0
61	1	36.5	88	148	78	96	30.7	197	9.6	141	5	528	38	1.2	334.905	7.3	2.6	23	2	40	38	15	4	0	0	0	1	0	0	0	0	0	0	0	0	0	0	4586.33	3.86	1.21	0
65	1	36.5	58	131	72	100	17.4	208	10.2	145	5.2	132	76	4.2	334.876	7.3	1.3	14	7	49	39	15	7	1	0	0	1	0	0	0	0	0	1	2	0	1	0	5330.47	1.98	2.09	1
52	2	37.22	108	129	72	91	14.5	137	13.1	135	5.7	523	68	3	334.741	7.2	3.8	34	7	47	27	15	6	0	1	1	0	1	0	0	0	1	0	0	0	0	0	6867.38	5.67	3.07	1
64	2	36.39	60	137	63	100	12.7	125	7.2	133	4	160	145	12.8	334.675	7.3	2.7	34	9	67	52	14	6	0	1	1	0	0	0	0	0	1	1	3	1	1	0	4534.94	29.9	10.91	0
65	2	37.83	92	106	56	100	15.1	253	10.6	153	3.9	51	50	2.7	334.49	7.33	1.8	13	6	54	33	15	6	1	0	1	0	1	1	0	0	0	1	2	0	0	1	5339.25	9.87	3.93	0
48	1	36.11	89	118	67	100	15.5	310	8	127	4.9	978	45	1.9	334.205	7.24	2.6	31	7	50	32	14	3	0	1	1	1	0	0	0	0	0	1	2	0	0	1	8657.95	5.15	4.13	1
78	2	37.44	104	125	39	99	31.1	488	9.3	128	5.5	300	141	6.3	334.024	7.36	1.6	16	9	72	47	14	8	1	0	1	0	0	0	0	0	1	1	3	1	0	1	-23773.2	14.07	3.86	1
56	2	36.5	87	122	60	100	46.7	393	7.3	127	6.6	437	118	13.8	333.621	7.16	4	36	11	152	86	3	7	1	0	1	0	1	0	0	0	1	1	3	1	1	0	6006.49	57.03	56.98	0
67	2	35.94	93	105	53	100	14.5	374	9.6	141	5	504	38	1.6	333.571	7.05	1.9	33	8	68	54	15	4	0	1	1	0	0	0	0	0	0	1	3	0	1	1	7122.18	25.62	25.68	1
79	2	35.89	120	110	70	100	17.1	174	8.8	139	5.6	314	75	6.3	333.43	7.08	17	39	12	119	81	3	11	1	0	1	0	1	1	0	0	1	1	3	1	1	1	6201.76	11.26	3.87	0
38	2	36.83	97	139	76	99	20.3	171	13.1	140	4.7	592	31	1.9	333.36	7.38	3.7	39	3	58	29	15	0	0	1	0	0	0	0	0	0	0	1	1	0	0	0	8113.52	3.4	1.88	0
55	1	36.33	89	208	98	96	15.4	326	9.1	130	5.8	705	63	7.2	333.267	7.45	2.33279	20	6	59	37	14	6	1	0	1	0	1	0	0	0	0	1	3	0	0	1	2129.64	3.52	1.45	1
80	1	37	95	178	117	97	10.8	318	11	141	5.1	93	100	9.5	333.081	7.36	2.4	20	5	46	37	14	7	1	0	0	0	0	0	0	0	0	0	0	0	0	1	1917.75	9.42	1.96	0
54	2	37.33	102	163	99	95	12.9	168	16.1	148	3.7	314	34	1	332.987	7.39	4.2	13	3	34	42	13	8	0	0	1	0	0	0	0	0	0	1	2	0	0	0	2760.79	4.17	2.12	0
32	2	36.67	83	145	85	100	9.3	149	13.3	140	2.6	767	14	0.9	332.811	7.35	1.69549	14	3	38	19	15	2	1	0	1	1	1	0	0	0	0	0	0	0	0	1	2577.39	15.23	2.3	0
57	1	36.72	87	151	76	94	13.8	421	10	135	5.6	601	51	2.1	332.803	7.27	1.2	13	4	52	37	14	8	0	1	0	0	1	1	0	0	1	1	1	0	0	1	1870.86	14.42	3.17	0
68	1	36.44	130	124	36	100	21	382	6.9	137	4.8	768	18	1.7	332.695	6.98	7.7	40	4	68	48	12	11	1	0	1	1	1	0	0	0	0	1	3	0	0	0	6541.95	8.33	2.71	0
58	2	39.5	92	192	120	98	7.3	178	10	146	5	339	33	3.5	332.619	7.36	0.9	26	4	54	33	13	6	1	0	1	0	1	0	0	0	1	1	3	0	0	0	2898.54	9.75	2.79	0
80	1	36.17	73	130	66	89	11	210	10	138	4.7	431	63	2.3	331.844	7.35	3.2	24	5	73	46	12	9	0	1	1	0	1	0	1	0	0	1	2	0	1	0	-1193.33	11.41	11.2	1
67	2	36.11	133	182	102	100	22.2	292	10.3	132	7	735	36	2.7	331.69	7.29	3.2	25	6	61	50	13	8	1	0	1	0	1	1	1	0	1	0	0	0	1	0	-3655.6	5.3	2.31	1
71	2	37.11	77	72	43	94	15.6	223	9.5	144	6.3	350	32	3.8	331.473	7.36	5.5	34	10	71	57	11	10	0	1	1	0	0	1	0	0	0	1	3	0	0	1	5767.86	17.75	3.39	1
68	2	36.78	86	111	59	99	5.3	174	11.5	137	3.5	130	121	3.6	331.437	7.35	2.3	21	4	39	40	15	9	1	0	1	0	0	0	0	0	1	0	0	0	0	1	3411.36	7.85	1.04	0
68	1	36.83	111	95	46	100	19.7	494	11.3	138	4.6	562	42	2	331.422	7.38	4.2	17	9	76	55	15	8	0	1	0	0	1	1	0	0	1	1	2	0	1	1	6001.29	10.18	1.88	0
62	2	37.22	101	138	113	97	15.8	159	11.4	139	5.3	422	54	3.5	331.33	7.21	1.2	32	5	48	32	15	7	0	1	0	0	0	1	0	0	1	1	1	0	0	1	4421.81	4.1	1.99	0
34	1	37.39	119	124	59	100	7.1	206	7.9	145	4	399	31	1.4	331.238	7.48	3.1	12	7	36	18	15	1	0	1	1	0	0	0	0	0	0	1	2	0	1	1	3481.84	3.06	3.02	1
32	1	37.5	109	104	58	100	14.9	218	10	139	4.3	564	36	2	330.79	7.35	1.7	28	5	61	29	10	2	0	1	1	0	0	0	0	0	0	1	1	0	0	1	5377.72	3.43	1.47	0
75	1	36.78	94	137	71	96	11.4	300	14.2	150	4.1	229	27	1.3	330.565	7.41	2.4	17	3	42	29	14	5	1	0	0	0	0	0	0	0	0	1	2	0	0	1	1295.81	4.96	1.96	0
77	2	37.89	81	136	95	100	9.5	125	10.4	136	5.4	218	99	6.2	330.268	7.25	1.4	20	10	52	43	15	9	1	0	1	0	0	0	0	0	1	1	3	1	1	0	2623.41	6.34	6.24	1
57	2	36.61	102	157	85	100	8.6	269	10.8	145	5.8	180	52	2	330.171	7.35	1.6	34	3	51	42	13	2	0	0	0	1	0	0	1	0	0	0	0	0	0	1	1771.42	6.25	1.36	1
77	1	36.72	90	135	73	95	10.5	245	13.3	146	3.7	355	30	1.2	329.837	7.38	3.3	15	7	68	49	11	11	1	0	0	0	1	0	0	0	1	1	1	0	0	1	2445.4	11.81	2.66	0
54	2	37	108	135	73	96	19.4	24	8.6	137	4.1	335	81	3.1	329.74	7.12	5	23	14	100	63	15	8	0	1	1	0	0	0	0	0	1	1	3	1	1	1	17211.4	13.18	12.84	1
49	1	35.94	106	83	49	100	13.9	307	11	132	3.8	748	46	2	329.584	7.2	3	21	9	55	38	15	2	1	0	1	0	0	0	0	0	0	1	3	1	1	1	9030.05	31.14	19.8	1
40	2	36.83	97	181	96	98	6.9	140	8.1	140	4.4	289	69	14.9	329.498	7.42	0.7	27	5	35	12	15	5	0	1	1	0	0	0	0	0	0	1	3	0	0	0	2543.95	2.07	1.05	0
34	1	36.61	92	152	80	96	11.5	150	10.4	144	3.6	320	46	4.2	329.406	7.27702	1.56621	22	4	47	14	15	5	1	0	0	0	1	0	0	0	0	1	1	0	0	1	4995.24	1.49	1.48	0
69	1	36.44	56	97	58	91	13.6	179	9.7	134	4.5	505	68	3	329.341	7.28	2.4	22	4	61	50	15	9	0	1	1	0	1	0	0	0	1	1	3	1	0	1	4999.66	6.77	2.77	1
28	1	35.44	123	104	52	100	25	235	13.5	132	4.1	718	48	1.7	329.232	6.89	1.6	29	6	85	38	15	0	0	1	1	0	0	0	0	0	0	1	2	0	1	0	15669.4	6.83	2.55	0
55	2	37.17	74	113	69	96	6.2	391	9.1	139	5.1	241	77	3.2	329.089	7.23	1.1	42	4	45	33	14	6	0	1	1	0	1	0	0	0	1	1	2	0	0	1	4395.74	9.52	3.18	1
55	1	36.61	112	126	74	93	21.7	63	10.3	135	4.5	194	110	1.5	329.063	7.26518	3.58576	16	11	71	50	14	7	1	0	0	0	0	0	0	0	0	1	3	0	0	1	-5419.33	36.09	4.09	0
59	1	36.44	126	119	80	94	18.9	216	7.4	137	5	508	47	1.3	329.008	7.35	4.5	24	10	107	77	15	10	1	0	0	1	0	1	0	0	0	1	2	0	0	1	2776.8	2.33	1.12	1
53	2	34.94	107	128	69	96	19.1	436	13.6	136	4.9	354	76	3.2	328.61	7.16	1.3	17	2	65	29	15	2	1	0	0	1	0	0	0	0	0	1	3	0	0	0	3693.72	15.62	6.66	0
54	1	36.94	89	120	79	92	8.6	238	6.2	134	5.3	385	80	2.7	328.56	7.5	1.9	24	3	46	31	15	8	1	0	1	0	1	0	0	1	1	1	1	0	0	1	1566.9	17.68	3.81	0
69	2	36.61	74	155	74	99	10.8	180	8.5	139	5.2	272	70	5.8	328.511	7.32194	2	16	4	48	33	15	9	1	0	1	0	0	0	0	0	0	1	1	0	0	0	1965	37.6	1.2	1
61	2	36.89	109	77	49	94	14.1	136	10.9	140	4.3	192	81	2.9	328.195	7.43	2.2	19	4	53	32	15	8	0	1	1	0	1	0	0	0	1	1	1	0	0	1	7642.17	2.7	1.45	0
55	2	37.06	127	161	146	100	22.1	527	9.4	144	3.1	361	39	1.8	328.184	7.36	1.2	21	10	85	64	13	7	1	0	1	0	1	0	0	0	1	1	2	0	1	1	3543.87	12.46	12.49	1
62	2	36.67	137	134	87	100	17.2	276	12.4	133	5.6	666	39	1.6	328.129	7.14	2.7	30	3	55	50	15	8	0	0	0	1	0	0	0	0	0	0	0	0	0	0	3155.69	8.66	1.75	0
64	2	37.06	71	117	76	100	14.8	198	9.8	139	2.9	320	74	4.7	328.006	7.41	1.893	19	4	48	35	14	9	1	0	1	0	0	0	1	0	1	1	1	0	0	0	2735.57	10.98	8.1	1
65	1	36.06	120	137	58	92	13.6	197	12	147	3.5	260	35	1.1	327.944	7.16	2.26088	23	4	63	41	9	3	1	0	0	1	0	0	0	0	0	0	0	0	0	0	5983.2	15.04	2.51	0
52	2	36.89	98	139	84	97	8.3	186	13.6	148	4.8	247	24	1.3	327.894	7.29	2.1	17	1	23	19	15	3	1	0	0	1	0	0	0	0	0	0	0	0	0	1	4065.26	5.76	1.71	0
42	2	37.56	112	105	67	100	24.9	51	9.7	137	4.8	331	71	4.7	327.346	7.11	16.3	41	12	86	46	15	2	1	0	1	0	1	0	0	0	0	1	3	0	0	0	8283.61	2.61	2.57	0
39	1	36.61	83	123	92	98	25.5	110	7.9	133	4.5	645	46	1.9	327.262	7.3	2.3	24	4	68	38	10	9	0	0	1	0	0	0	0	0	0	1	2	0	0	0	5446.57	18.05	1.92	1
37	2	37.06	95	142	89	97	18.6	181	7.4	139	3.5	201	87	6.1	327.238	7.22	1.8	15	5	70	37	13	4	0	1	1	0	0	0	0	0	1	0	0	0	0	1	4713.83	6.8	1.66	0
49	2	36.56	108	141	113	85	14.7	88	11.5	133	5	575	54	2.4	327.23	6.95	1.7	21	12	118	59	6	3	0	1	1	0	0	0	0	0	1	1	3	0	1	0	16299.3	18.71	13.94	0
53	1	36.11	134	92	75	100	13.8	230	12.9	145	3.6	418	19	1	327.208	7.14	0.9	21	8	51	37	15	2	0	1	1	0	0	0	0	0	0	0	0	0	0	1	-2723.85	7.54	3.49	0
42	1	36.67	73	130	75	100	9.5	184	9.4	140	5.3	112	85	10.6	327.179	7.32	2.15487	23	4	40	34	15	4	1	0	0	0	0	0	0	0	1	1	3	0	0	0	2753.48	4.18	1.82	0
32	1	37.06	91	132	80	99	5.4	131	11.1	151	3.5	157	26	1.1	327.008	7.44	1.5	17	2	29	12	15	1	0	0	0	0	0	0	0	0	0	0	0	0	0	1	2479.23	3.07	1.45	0
60	2	36.78	85	109	39	91	17.6	188	9.1	136	3.8	497	55	5.1	326.854	7.39	2.6	30	8	76	48	13	7	0	1	0	0	1	0	0	0	0	1	3	0	1	1	6052.45	3.53	1.25	0
66	1	37.22	95	132	88	97	9.5	168	10.6	148	3.2	292	23	1.3	326.837	7.32	2.3	14	8	45	44	8	4	1	0	1	1	0	0	1	0	0	1	2	0	0	1	3658.85	4.42	1.49	1
47	2	37.11	131	100	61	93	14.4	290	5.7	128	5.8	724	53	3.1	326.751	7.31	2.7	17	9	72	53	12	4	1	0	1	0	0	0	0	0	1	1	2	0	1	0	7579.61	2.5	2.53	1
58	2	36.39	97	152	93	100	7.4	191	13.3	136	5.1	466	52	2	326.66	7.27716	2.6	30	3	54	27	15	5	0	1	0	0	0	0	0	0	1	0	0	0	0	1	1764.77	3.88	1.12	1
29	1	36.56	130	118	59	98	19.2	321	12.2	148	4.5	260	20	0.9	326.587	7.12	4.7	33	2	45	24	14	0	0	1	0	0	0	0	0	0	0	1	1	0	0	0	6988.78	5.43	3.41	1
71	1	36.39	119	113	61	99	14.1	226	11.6	145	4.4	320	28	0.9	326.578	7.21	1.92214	36	3	46	50	13	5	1	0	0	1	0	0	0	0	0	0	0	0	0	0	7639.28	5.75	1.29	0
75	2	37.11	108	152	108	97	11	137	11.8	145	4.3	340	25	1.1	326.417	7.4	1.7	16	6	53	36	7	5	0	0	0	0	1	0	0	0	0	1	2	0	0	1	171.66	4.46	1.71	0
70	1	36.67	96	119	45	100	7.2	280	9.8	136	5.2	548	38	1.2	326.416	7.28	3.2	19	4	80	38	12	8	1	0	1	1	0	0	0	0	0	1	1	0	0	0	3183.68	3.46	1.74	1
78	2	36.72	105	167	83	100	7.9	264	7.2	141	5.1	281	52	7.3	326.383	7.41	1.3	22	5	46	35	14	8	1	0	0	0	0	0	0	1	1	1	2	0	0	1	1347.72	7.94	1.04	0
56	2	37.44	100	112	54	100	12.5	225	11	141	4.4	344	46	1.5	326.34	7.22	1.8	29	3	51	24	15	4	0	1	0	0	0	0	0	1	0	0	0	0	0	0	4614.63	4.17	1.18	0
35	1	37.39	113	158	92	99	11.5	342	10.4	150	3.6	137	32	1.3	326.24	7.45	1.1	12	2	45	20	15	3	0	1	1	1	1	0	0	0	0	0	0	0	0	0	3495.23	7.05	4.16	1
69	1	37	88	113	44	99	9.9	155	11.2	142	3.7	433	30	1.3	326.17	7.27	4.8	16	8	53	41	15	5	0	1	1	1	0	0	0	0	0	1	2	0	1	1	4583.6	6.75	6.73	1
55	1	36.28	153	133	103	100	21.4	296	10	149	4.8	173	25	1.9	326.14	6.97	1.5	27	9	96	49	9	6	0	1	1	0	1	0	0	1	0	0	0	0	0	0	5719.68	14.94	6.81	0
77	2	36.67	83	149	53	99	17	264	9.3	145	3.4	238	45	1.9	326.094	7.38	1.6	15	3	45	35	15	7	0	1	0	0	0	0	0	0	1	1	1	0	0	1	4341.9	3.93	1.06	1
70	2	37.11	86	143	53	96	16	279	9.9	142	3.2	115	82	4.5	326.075	7.35238	1.87437	17	4	42	28	15	8	1	0	1	0	0	0	0	0	1	1	1	0	0	1	4842.13	11.14	1.09	0
46	2	36.78	78	139	79	98	8	256	13.7	145	3.9	428	12	1.1	325.863	7.34	1.63899	19	3	27	16	15	1	0	1	0	0	0	0	0	0	0	0	0	0	0	1	4511.66	4.73	1.91	0
61	2	35.33	64	94	68	78	4.3	18	8.5	146	5.7	165	37	2	325.781	7.2	4.3	17	21	159	86	3	7	0	1	1	1	0	0	0	0	0	1	3	1	1	1	12535.4	2.92	3.61	1
36	2	38.28	109	115	67	100	4.6	41	10.5	145	4	146	55	4.3	325.754	7.38	1.1	19	7	49	24	15	4	1	0	1	0	0	0	0	0	0	1	2	0	0	0	1934.72	20.85	5.83	0
54	2	36.44	90	124	80	100	19.2	225	10.3	137	5.8	394	51	3.2	325.703	7.09	9.4	27	10	78	56	15	2	1	0	1	1	0	0	0	0	0	1	3	1	1	1	3827.84	20.83	10.9	0
63	2	36.94	100	148	104	96	7.7	95	11	141	4.8	401	33	1.2	325.663	7.41	1.81717	12	3	47	30	15	7	0	0	1	0	1	0	0	1	0	1	3	0	0	1	1896.67	7.16	1.95	0
50	1	36.28	140	127	53	100	10.6	183	10.1	134	4.2	614	42	1.3	325.511	7.19248	2.35428	27	3	69	31	14	6	0	1	1	1	0	0	1	0	0	0	0	0	0	0	4637.88	4.86	3.1	1
59	2	37	111	137	65	98	13.1	307	9.5	144	4.1	198	51	4	325.414	7.36	1.2	17	4	59	39	13	8	0	1	1	1	1	0	0	1	0	1	1	0	0	1	4206.84	5.48	1.44	0
33	2	36.78	107	142	89	100	8	223	8.7	138	4.6	447	43	2	325.39	7.25	1.1	15	3	44	20	15	4	0	1	0	0	0	0	0	0	1	0	0	0	0	0	4851.26	1.86	1.11	0
59	1	36.83	100	122	66	97	3.5	152	11.1	140	1.8	424	51	3.32179	325.37	7.21	5.1	19	19	131	80	3	2	0	0	1	0	0	0	0	0	0	1	3	0	1	1	4011.2	4.48	5.44	1
69	2	37.67	114	125	55	100	10.9	367	13.8	146	4	300	24	1.6	325.238	7.30522	1.82466	28	4	55	27	14	5	0	1	0	0	0	0	0	0	1	1	1	0	0	1	5075.98	2.88	1.78	0
78	2	37.22	79	148	58	100	7.8	157	8.4	147	4.7	232	25	1.4	325.217	7.39	1.6	24	4	49	41	11	6	1	0	1	1	0	0	0	0	0	1	2	0	1	0	4416.65	8.09	5.22	0
43	2	37.39	77	126	102	100	6.2	150	7.5	138	4.1	526	33	2.8	325.208	7.24	2	23	4	32	24	15	7	0	1	1	0	0	1	0	0	1	1	1	1	1	1	8824.09	515.56	27.47	0
56	2	36.11	84	101	59	93	26.1	288	11.5	139	3.3	538	30	2.2	325.203	7.05	12.8	35	10	82	48	15	2	0	0	1	1	0	0	0	0	0	1	3	1	1	1	6547.47	3.63	3.76	1
73	1	37.5	106	123	58	98	13.6	176	10.7	142	5.3	396	24	0.9	325.171	7.37	1.6	22	2	62	37	13	7	0	1	0	0	1	1	0	0	0	0	0	0	0	1	2626.88	15.47	1.12	0
49	2	36.61	82	152	73	100	10.7	245	11.5	137	5.1	426	48	1.8	325.01	7.33663	2.04593	15	3	56	27	15	5	0	1	0	1	0	0	0	0	0	1	1	0	0	0	1672.53	7.01	1.04	1
48	2	37	95	180	84	99	8.1	218	10.9	129	4.7	580	71	4	324.979	7.37	2.1	22	3	46	22	15	4	1	0	0	0	0	0	0	0	0	1	2	0	0	1	1122.4	3.96	1.03	1
76	1	36.89	118	95	61	98	16.2	323	13	148	4.6	218	21	1.2	324.811	7.36	1.5	13	5	24	32	15	8	1	0	1	0	1	0	0	0	0	0	0	0	1	0	5653.99	6.56	3.68	1
29	2	36.94	112	167	85	100	22.1	280	11.4	132	5.4	553	54	2.1	324.808	7.36	1.69451	23	2	53	25	15	1	0	1	0	0	0	0	0	0	0	0	0	0	0	0	4457.47	3.98	2.19	0
76	2	37.11	105	156	65	95	11.5	140	12.3	141	5.1	439	23	1.3	324.803	7.39	1.2	16	7	59	41	13	7	1	0	1	0	1	0	1	1	0	1	1	0	0	1	2174.75	6.3	1.36	0
61	2	36.89	90	133	67	99	17.5	209	12.1	134	5	386	71	4.3	324.802	7.29	1.5	15	7	48	41	15	10	1	0	1	1	0	1	1	0	1	1	3	0	1	1	4499.88	17.7	4.57	1
27	1	37.72	103	137	81	94	14.8	280	10.4	151	4.5	151	15	0.8	324.746	7.42	1.86225	8	2	29	14	14	1	0	1	0	0	0	0	0	0	0	0	0	0	0	0	3705.45	6.39	4.93	0
79	2	36.72	85	137	50	100	21.1	131	10	139	4	378	49	2.4	324.5	7.32	3.1	13	10	57	52	15	7	0	1	1	0	1	0	0	0	1	1	3	0	1	1	5531.13	7.43	7.51	1
76	1	37.78	100	158	79	95	14.9	256	10.5	135	5.2	549	38	2	324.471	7.41	4.4	19	7	44	47	15	7	1	0	1	1	0	0	0	0	1	0	0	0	0	0	3788.46	5.82	3.81	0
71	1	39.44	108	132	61	100	12.8	358	8.6	149	3.9	128	32	1.1	324.34	7.4	2.7	10	1	41	45	15	4	1	0	1	1	0	0	0	0	0	1	1	0	0	0	579.16	14.8	3.58	0
52	1	36.72	110	147	97	100	6.8	138	11.4	138	5	522	26	1.2	324.286	7.35	3	22	1	38	21	15	2	1	0	0	1	0	0	0	0	0	1	1	0	0	0	8236	6.28	2.35	0
59	1	35.94	57	110	58	96	17.2	125	9.7	145	3.6	204	44	2.9	324.248	7.4	0.7	12	7	45	31	15	3	0	1	1	0	0	0	0	0	0	1	1	0	1	0	-1333.53	34.03	19.18	0
62	2	37.33	87	164	61	100	10.2	241	8.7	129	4.9	164	132	12.1	324.054	7.22	1.1	28	6	61	47	13	6	0	1	0	0	0	0	0	0	1	1	2	0	0	0	2704.3	6.68	2.15	0
63	2	36.44	77	131	70	95	10.8	158	9	140	5.2	274	51	1.5	323.837	7.17	2	7	2	43	34	15	4	0	1	1	1	0	0	0	0	0	0	0	0	0	1	3929.84	6.71	2.39	1
39	2	37.22	121	116	68	98	13.6	282	11	140	4.6	338	44	1.5	323.692	7.25	1	22	2	63	26	15	0	0	1	0	0	0	0	0	0	0	0	0	0	0	0	4461.33	1.52	1.5	0
75	2	37.11	113	131	73	100	29.8	98	9.3	140	5.5	254	52	2.8	323.683	7.24	3.5	17	8	60	58	15	6	1	0	1	1	1	1	0	0	0	1	2	0	1	0	5744	28.78	18.77	0
36	2	34.78	126	126	80	100	16.7	249	12.6	147	4	235	24	1.4	323.627	7.1	1.1	29	3	58	16	14	0	0	1	0	0	0	0	0	0	0	0	0	0	0	0	5321.66	4.09	2.88	0
52	1	37.44	102	158	70	100	8	284	8.2	142	4.5	352	31	1.1	323.627	7.3	1.89943	18	2	30	27	14	6	0	1	0	0	0	0	0	0	1	0	0	0	0	0	7141.48	5.84	2.19	0
64	2	38.22	112	106	72	89	2.4	114	10	144	4.2	194	46	1.3	323.606	7.45	4	16	6	52	35	13	5	1	0	1	0	1	0	0	0	0	1	2	0	1	0	3634.56	29.51	15.33	0
73	1	36.33	88	148	73	96	13.2	276	8.8	127	5.8	850	30	1.5	323.537	7.34	2.8	22	3	44	36	14	9	1	0	1	0	1	0	1	0	1	1	2	0	0	0	856.67	5.98	1.64	0
42	2	37.22	96	105	75	96	11.4	271	8.7	139	4	187	76	4	323.532	7.19	0.9	15	3	43	25	15	4	0	1	1	0	0	0	0	0	1	1	3	0	0	1	4799.44	7.87	1.75	1
67	2	37.06	74	113	67	93	7.6	174	13.2	132	4.3	453	72	3.5	323.481	7.28	2.1	14	14	130	82	3	9	1	0	1	0	1	1	0	0	1	1	3	1	1	1	815.6	6.89	6.98	1
58	2	37.22	93	123	55	99	20.6	271	11.4	130	4.8	648	50	5.8	323.457	7.12	3	32	14	81	60	15	3	0	0	1	1	1	0	0	0	0	1	3	0	1	1	4388.78	19.74	13.94	1
55	2	36.61	77	96	66	99	8.8	227	10.6	122	4.6	851	64	4.4	323.335	7.28	1.5	19	4	50	37	15	2	1	0	1	1	0	0	0	0	0	1	1	0	0	0	7767.21	4.57	1.8	0
61	1	37.17	108	138	54	100	15	303	8.7	138	3.8	463	39	1.7	323.251	7.43	2.2	25	3	61	37	15	7	0	1	0	1	0	0	1	0	0	1	2	0	0	0	3278.69	12.37	2.45	1
77	1	35.83	97	106	46	100	33.8	601	7.9	148	4.9	139	27	1.9	323.165	7.2	22	45	10	53	44	15	7	1	0	1	1	0	0	0	0	0	1	3	1	1	1	13233.9	19.66	19.69	1
41	1	37.56	92	99	63	100	25	98	10.9	141	4.5	373	32	1.1	323.151	6.86	0.7	14	9	75	45	15	3	1	0	1	1	0	0	0	0	0	1	1	0	0	1	8000.23	20.45	5.57	0
68	2	36	91	163	73	100	4.4	85	8.9	143	3.4	262	44	1.4	323.07	7.33975	2.1	16	8	51	42	14	8	1	0	0	0	0	0	0	0	1	1	2	0	0	1	3295	17.28	1.19	1
51	2	36.83	108	103	51	100	23.9	239	12.7	129	5.1	576	64	2.6	323.057	7.19	1.8	31	8	64	39	14	2	1	0	1	1	0	0	1	0	0	0	0	0	1	0	7535.03	4.79	2.57	0
68	2	36.33	104	148	64	95	6.6	223	12.3	144	4.4	112	56	2.9	323.022	7.23	0.9	36	3	32	29	14	4	0	0	0	0	0	0	0	0	1	0	0	0	0	0	6242.8	5.91	2.32	0
50	2	37.17	123	166	92	94	14	221	12.3	135	6.6	484	36	8.1	322.946	7.39	3.9	22	6	75	39	14	5	0	1	0	0	0	0	0	0	1	1	3	0	0	0	1996.2	6.54	2.63	0
62	2	36.67	119	137	70	94	16.7	232	15.6	142	4.5	332	32	1.8	322.873	7.33	1.4	24	1	55	44	15	8	0	0	0	0	0	0	0	0	0	0	0	0	0	1	7712.15	3.96	2.81	0
60	1	37.22	116	114	67	98	9.8	145	8.7	144	4.6	153	48	2.2	322.843	7.3	1.2	16	10	84	47	9	10	0	1	1	0	1	0	0	0	1	1	2	0	0	0	3342.17	28.89	5.49	1
72	2	36.61	80	101	63	94	14	178	12.6	137	5.4	324	56	1.8	322.8	7.31	1.7	27	9	62	40	14	9	1	0	1	0	1	1	0	0	0	0	0	0	0	1	5654	9.77	6.7	0
60	2	37.83	94	142	67	100	12.3	295	11.7	141	4.3	327	39	1.7	322.695	7.29453	1.52866	23	3	44	30	15	7	0	1	1	0	1	0	0	0	1	1	1	0	0	1	-687.65	3.05	2.1	0
60	2	37.06	91	144	59	99	20	277	9.9	140	4	313	48	1.3	322.532	7.31	1.4	16	4	51	38	14	4	1	0	0	1	0	0	0	0	0	0	0	0	0	0	3313.65	5.65	3.5	0
73	2	36.33	92	122	102	96	11.7	230	12.3	132	4.8	572	48	1.4	322.521	7.37	2.7	20	3	49	32	15	7	1	0	1	0	1	1	0	0	0	1	3	0	1	0	2282.6	3.08	3.2	1
59	2	37.22	100	141	82	99	18.5	272	12.6	136	6.1	419	42	1.6	322.478	7.35	4.6	30	1	36	32	15	5	1	0	0	1	0	0	0	0	0	0	0	0	0	1	4818.52	2.27	1.32	0
47	1	36.06	98	166	79	100	14.6	271	11.9	135	5.2	243	80	8.3	322.471	7.41	2.5	28	11	48	37	15	5	0	1	1	0	0	0	0	0	0	1	3	1	1	1	1988.68	1.65	1.75	1
73	1	36.39	96	134	75	98	17.6	269	14.4	146	3.3	275	24	1	322.449	7.17	2.9	20	0	34	35	15	4	1	0	0	1	0	0	0	0	0	1	1	0	0	0	4749.46	4.95	2.06	0
70	2	37.44	113	145	78	96	15.1	270	14.6	148	3.5	182	26	1	322.397	7.41	3.8	11	4	45	38	15	5	1	0	1	1	0	0	0	0	0	1	2	0	1	0	2776.09	34.14	21.86	1
34	2	37.17	111	134	72	100	17.9	288	15.5	144	4.1	348	19	1.3	322.319	7.25472	2.36621	30	2	40	11	15	1	0	1	0	0	0	0	0	0	0	0	0	0	0	0	6127.98	2.68	2.63	0
77	2	36.72	87	128	67	92	10.7	150	9.1	140	3.9	273	54	1.9	322.252	7.21	7.5	16	9	58	37	14	6	1	0	1	0	1	1	0	0	0	1	2	0	1	0	2146.94	12.05	7.05	1
71	1	37.89	91	112.848	69.222	97	10.8	307	8.3	137	3.6	546	30	2.2	322.248	7.27	9.4	21	13	81	61	15	5	1	0	1	0	1	0	0	0	0	1	3	1	1	1	7753.5	5.59	4.01	1
32	2	36.72	88	119	61	99	8.9	731	6.5	131	5.8	271	94	13.8	322.227	7.47	1	27	6	53	19	14	4	1	0	0	0	0	0	0	0	0	1	1	0	0	0	1024.67	3.83	1.66	0
31	2	37.22	110	162	93	99	16.2	246	14.4	147	3.7	213	25	1.4	322.162	7.28618	1.3	17	2	54	18	15	2	0	1	0	0	0	0	0	0	0	1	1	0	0	0	5659.18	9.47	1.67	0
59	2	37.06	104	145	77	100	14.2	305	8.1	140	5.3	342	35	1.9	322.1	7.32	1.9	10	4	43	27	14	6	1	0	1	0	1	0	0	1	0	1	2	0	0	0	3193.97	15.03	2.14	1
36	1	36.83	106	130	79	100	28.5	405	11.7	145	4.6	328	13	1.3	322.065	7.3	1.9	26	3	38	20	14	2	0	1	1	0	0	0	0	0	0	0	0	0	0	0	7454.97	10.23	2	0
58	2	36.72	89	136	85	90	16.3	413	10.4	144	3.5	415	11	0.7	321.984	7.43	5	17	1	31	31	13	6	1	0	0	0	0	0	1	1	0	1	1	0	0	1	1418.79	42.73	7.18	0
66	2	37.06	89	121	76	99	8.2	110	12.1	144	4.7	215	35	4.1	321.844	7.41	5.3	21	10	62	49	15	6	1	0	1	0	0	0	0	0	1	1	3	0	1	0	3926.29	12.96	5.85	1
53	2	36.67	128	120	67	99	8.6	190	11.5	129	5.4	712	37	2	321.57	7.18	3.8	35	2	45	31	15	1	0	1	0	1	0	0	0	0	0	0	0	0	0	0	86.24	4.53	1.41	0
72	1	36.94	108	109	55	100	17.6	166	11.2	142	4.2	248	43	2.9	321.535	7.23	6.4	36	8	80	52	15	8	1	0	1	0	0	0	0	1	1	1	3	1	0	0	5716.52	7.4	2.22	0
71	1	36.89	116	183	115	100	15.1309	248.036	12.0492	141.525	4.16654	278.505	40.9858	2.75065	321.494	7.34396	2.43769	19.3832	3	46	37	10	7	1	0	0	0	0	0	0	0	1	0	0	0	0	0	6382.36	5.23	2.35	1
36	2	36.67	102	82	60	99	30	262	10.5	137	4.2	470	36	5.5	321.368	7.44	4.8	23	10	73	45	15	4	0	1	1	0	0	0	0	0	1	1	3	1	1	1	2431.52	2.18	4.1	1
72	2	38.89	102	133	63	97	10.6	163	10	149	2.8	204	18	0.9	321.362	7.32816	1.54514	10	1	27	39	15	4	1	0	0	1	0	0	0	0	0	1	3	0	1	0	3635.3	7.68	2.17	0
61	2	37.72	77	131	48	94	11.5	213	10.5	126	5	803	41	1.8	321.254	7.36	1.9	23	2	46	34	15	5	0	1	1	1	0	0	0	0	0	1	2	0	0	0	6838.24	7.24	1.35	0
50	2	36.5	134	115	87	93	11.6	233	18.3	143	9	224	13	1.6	321.087	7.21	6.6	14	14	100	63	15	7	1	0	1	0	1	0	0	0	0	1	3	1	1	1	18964.2	25.05	9.42	0
47	2	37.11	70	108	81	92	8.6	162	11.8	151	3.1	146	13	0.9	320.954	7.38	1	13	4	32	24	11	1	1	0	1	1	0	0	0	0	0	1	2	0	0	1	2156.19	4.57	2.58	0
27	2	36.22	94	138	87	95	12.3	232	8.3	131	4.8	509	59	7.3	320.949	7.26	0.9	18	6	49	20	14	4	0	1	1	0	0	0	0	0	1	1	1	0	0	0	5138.89	3.1	2.03	1
79	2	37.72	60	109	56	100	16.8	299	12.4	134	6.2	304	66	1.9	320.86	7.28	2.2	13	10	90	60	7	11	1	0	1	0	1	0	0	1	0	1	1	0	1	0	2767.67	2.29	3.36	1
68	1	36.5	99	139	85	92	17.2	226	10.1	137	5.5	343	47	1.6	320.841	7.29	2.1	12	4	49	27	14	9	1	0	1	0	1	1	0	0	1	0	0	0	0	1	2489.85	9.08	3.17	0
62	2	37.22	106	120	75	100	8.5	228	13.2	142	4	330	29	0.9	320.69	7.39	2.5	13	1	45	31	15	4	0	0	0	0	0	0	0	0	0	1	1	0	0	0	5717.83	9.9	1.55	0
60	1	36.94	132	149	72	99	21.5	673	8.6	138	5.9	508	13	1.4	320.665	7.09	4.2	33	1	45	29	15	1	0	1	0	0	0	0	0	0	0	1	2	0	0	1	3218.4	6.07	1.77	0
61	2	36.94	105	132	60	95	22	147	14.9	133	4.7	563	39	1.8	320.606	7.12	8.9	21	9	46	47	15	7	1	0	1	1	1	0	0	0	0	1	1	0	1	0	-1483.54	9.17	4.24	0
66	2	36.44	94	144	70	94	20.6	399	15.4	132	4.2	532	52	1.8	320.527	7.32	2.8	18	2	53	30	15	6	1	0	1	0	0	0	0	0	1	0	0	0	0	0	3938.24	60.8	1.36	1
60	1	36.67	88	209	76	98	14	301	10.4	133	6.2	402	55	5	320.376	7.35	2.2	21	4	42	34	15	7	1	0	0	1	0	0	0	0	1	1	3	0	0	1	1782.36	4.63	1.86	0
73	2	37	117	132	91	92	7.4	186	17.1	141	3.9	248	47	1.7	320.363	7.32895	1.5	20	3	43	27	14	10	1	0	1	0	1	1	1	0	1	1	2	0	0	1	1446.53	17.4	6.45	1
70	1	36.89	98	87	70	100	21.3	410	11.7	133	4.2	499	51	2.6	320.337	7.11	2.2	25	7	62	49	14	6	0	1	1	1	0	0	0	0	0	1	2	0	0	1	11843.3	7.05	2.07	0
58	2	36.22	104	115	69	98	3.1	177	15.5	134	4.5	542	37	1.6	320.325	7.34	1.8	20	2	52	24	15	5	1	0	0	0	0	0	0	0	1	0	0	0	0	1	1421.93	6.05	1.15	1
54	2	36.67	115	135	77	99	8.3	155	13.6	140	3.6	356	37	2	320.192	7.23	1.8	20	2	46	29	15	2	0	1	0	1	0	0	0	0	0	0	0	0	0	1	5906.98	4.76	2.04	0
65	1	36.83	113	118	79	93	17.9	262	9.1	141	5.2	243	40	1.4	320.186	7.24	1.7	18	3	61	31	14	5	0	1	1	1	0	1	0	0	0	0	0	0	0	0	4202.61	6.81	2.07	0
72	2	37.11	125	93	60	99	10.9	292	12.9	137	3.6	367	52	1.9	320.16	7.09	6.4	22	9	60	55	15	5	1	0	1	1	0	0	1	1	0	1	3	0	1	1	5576.59	32.64	20.85	0
62	2	37.56	110	177	73	98	9.3	160	11.3	137	5.4	397	37	1.7	320.07	7.26629	1.8	26	3	56	39	15	7	0	1	0	0	0	0	0	0	1	1	1	0	0	1	4887.44	5.14	1.09	0
69	2	36.44	84	135	115	96	19.6	77	8.5	142	3.6	210	48	3.5	320.01	7.29	0.9	23	6	60	47	15	7	1	0	1	0	0	1	0	0	1	1	3	0	0	1	4375.85	14.93	4.38	1
62	1	36.67	128	176	75	98	8.6	221	12.7	148	3.1	236	13	0.8	319.954	7.36248	1.3	17	0	27	26	15	3	1	0	0	1	0	0	0	0	0	0	0	0	0	1	2774.5	8.44	1.43	0
43	2	37	92	176	89	100	12.5	314	11.2	136	3.7	267	72	4.5	319.948	7.34116	2.11005	18	6	44	29	13	5	0	1	0	0	0	0	0	0	1	1	1	0	0	1	2833.41	3.64	1.73	1
25	2	35.72	127	112	42	100	9.1	159	12.1	137	4.4	469	31	1.4	319.927	7.13	1.6	34	3	77	26	15	1	0	1	0	1	0	0	0	0	0	0	0	0	0	0	8546.58	3.12	2.03	0
34	2	36.94	89	144	90	99	11.3	310	15.8	139	4.5	437	24	1.3	319.849	7.22	1.1	32	3	44	26	13	0	0	1	0	0	0	0	0	0	0	0	0	0	0	0	4805.98	3.14	2.33	0
78	1	37.06	99	112	79	95	13.9147	229.792	11.6301	143	4	270	30	1.2	319.714	7.31	5.5	17	9	42	35	15	7	1	0	1	1	0	1	1	0	0	0	0	0	0	1	4646.14	10.72	2.9	0
49	1	37	106	141	92	99	18.9	193	11.5	144	3.1	388	11	0.7	319.684	7.37	1.5	19	1	27	21	15	2	0	1	0	0	0	0	0	0	0	0	0	0	0	1	4234.11	5.03	1.21	0
37	2	36.44	104	86	45	100	9.2	288	7.4	134	4	483	47	1.7	319.619	7.27867	1.8	29	3	57	22	15	2	0	1	0	0	0	0	0	0	0	1	1	0	0	0	4874.41	6.15	2.28	1
44	2	37	108	129	69	99	6.5	107	13.3	141	3.8	334	32	1.2	319.584	7.3	1.49057	26	6	53	49	15	8	1	0	0	0	0	0	0	0	0	0	0	0	0	1	6674.22	4.24	1.23	0
52	2	38.5	91	156	71	96	17	377	9.5	134	4.5	254	79	13.8	319.325	7.3	0.7	21	6	42	26	14	7	0	1	1	0	1	0	0	0	0	1	1	0	0	1	2099.62	10.75	1.68	1
53	2	36.5	105	161	100	100	12	202	13.4	142	4.7	252	33	1.4	319.186	7.2	1.7	21	2	40	24	15	2	1	0	0	0	0	0	0	0	0	1	2	0	0	1	8647.65	5.89	2.7	0
69	1	37.06	101	177	57	76	12.4	226	8.2	142	4.7	145	49	2.1	318.956	7.34	1.5	16	2	41	25	15	9	0	1	0	0	1	1	1	0	1	0	0	0	0	1	2182.04	10.08	2.05	1
54	2	36.83	126	127	92	95	26	355	11.4	143	4.7	256	26	1.6	318.908	7.24	2.1	27	6	48	37	15	3	1	0	1	1	0	0	0	0	0	1	2	0	1	1	7063.57	11.4	10.82	0
65	1	37.39	117	109	46	94	12.5	180	11.8	140	4	312	37	1.8	318.548	7.33	2.5	20	3	49	36	15	4	0	1	0	1	0	0	0	0	0	1	1	0	0	0	4563.48	3.58	1.53	0
79	1	37.17	80	151	59	100	17.7	218	9.8	131	6.2	595	31	2.3	318.527	7.1	5	19	10	80	63	15	8	1	0	1	0	0	0	0	0	1	1	3	1	1	1	4030.88	7.7	3.36	0
54	2	36.61	107	101	64	98	21.2	305	12.7	135	4.8	544	24	0.9	318.394	7.39	1.9	25	1	41	24	15	4	1	0	0	0	1	0	0	0	0	1	2	0	0	0	6122.82	11.34	2.37	0
52	1	36.61	66	101	47	95	11.9	290	8.7	130	4.1	626	43	4.2	318.335	7.28	1.7	15	7	65	37	15	8	1	0	1	0	1	0	0	1	1	1	3	0	0	1	5466.32	9.53	3.45	1
54	2	36.89	87	137	74	100	7.1	302	8.5	136	3.8	517	28	4.4	318.322	7.31	1.4	32	5	39	29	15	8	0	1	1	0	0	1	0	0	1	1	2	0	0	1	3980.71	5.31	2.26	0
57	1	36.5	155	62	41	98	1.5	207	16.7	140	5.8	389	14	1.1	318.211	7.05	6	16	12	151	60	15	5	1	0	1	1	0	0	0	0	0	1	2	0	1	1	22516.2	0.93	1.01	1
41	1	36.78	98	108	68	100	18.4	420	9.9	143	4.5	344	11	0.7	318.04	7.12	0.9	16	2	55	39	15	4	1	0	1	0	0	0	0	0	0	1	1	0	1	0	4165.32	14.33	4.52	0
76	2	38.06	146	112	55	100	1.3	119	13.4	145	3.5	263	18	0.9	318.04	7.44	3.4	22	12	103	60	15	5	0	0	1	1	0	0	0	0	0	1	3	0	0	1	6892.45	25.24	15.16	0
55	2	36.61	121	125	69	99	9.9	63	8.1	137	4	378	42	0.7	318	7.3239	3.6	22	5	53	32	15	6	1	0	1	0	0	0	0	0	0	1	1	0	0	0	1714.22	12	1.48	1
73	2	36.94	127	117	67	100	19.6	383	10.1	138	3.4	376	40	1.4	317.975	7.4	5.6	19	4	63	39	15	9	0	1	1	1	1	1	1	0	0	1	1	0	0	1	2672.8	17.99	4.77	1
66	2	37.11	92	78	61	95	19.3	359	12.4	142	5.3	234	29	1.7	317.957	7.3	1.9	13	7	56	52	15	4	1	0	1	1	0	0	0	1	0	1	3	0	1	0	1331.27	52.25	52.27	1
57	1	37.22	97	146	42	94	13.1	231	8.9	142	5.2	179	38	2.3	317.916	7.23	0.9	21	6	56	43	15	8	0	1	1	0	1	0	1	0	1	0	0	0	1	1	1358.68	4.02	4.04	1
77	2	36.72	123	159	102	99	8.8	118	11.3	143	4.2	281	22	1.1	317.868	7.3	1.6	23	2	40	32	14	4	1	0	0	1	0	0	0	0	0	1	1	0	0	1	2989.86	7.6	2.19	1
50	2	36.56	81	156	93	99	9.6	160	10.2	148	3.6	167	15	0.9	317.835	7.4	2.09344	23	1	35	24	14	3	0	1	0	1	0	0	0	1	0	0	0	0	0	0	6433.79	2.66	1.65	0
75	2	36.44	86	102	55	100	17.7	167	14.7	137	4.5	402	35	1.4	317.833	7.04	3.6	26	6	47	46	15	9	0	1	1	0	1	1	1	0	0	1	2	0	0	1	9261.46	9.04	4.16	0
57	2	38.56	79	186	99	97	10.2	156	12.4	145	3.7	194	27	1.2	317.821	7.42	2.3	10	4	41	29	7	6	0	1	1	1	0	0	0	0	0	1	2	0	0	0	36.33	14.81	4.89	0
77	2	36.39	107	127	55	97	12.9	187	10	136	4.5	217	69	3	317.698	7.37	2	19	3	45	44	15	13	0	0	0	0	1	1	0	0	1	0	0	0	0	1	3796.44	5.87	1.49	1
68	1	36.17	159	159	82	97	12.9	260	9.4	144	4.8	97	41	3.4	317.632	7.39	1.5	12	4	77	56	13	7	1	0	1	0	1	0	0	0	1	1	3	0	0	0	4328.16	5.87	2.08	0
49	1	37.11	135	113	57	100	16.3	203	12.5	146	3.8	182	22	1.5	317.568	7.2567	2.62096	24	2	51	26	15	2	0	1	0	0	0	0	0	0	0	0	0	0	0	1	5313.65	3.05	1.38	0
47	2	36.5	108	155	87	95	23.6	464	12.7	139	6.6	261	33	1.6	317.486	7.3	2.6	30	5	76	40	11	2	0	1	1	0	0	0	0	0	0	0	0	0	0	0	2754.9	2.74	2.8	0
73	1	37.22	93	141	55	92	4.8	288	9.4	137	4.4	334	45	1.3	317.427	7.34	3.4	23	3	50	49	13	9	0	1	1	0	1	1	0	0	0	1	3	0	0	0	7278.89	39.21	4.66	1
74	1	36.72	92	112	54	95	17.2	310	8.5	138	4.2	227	57	2	317.368	7.28	1.7	23	3	72	48	15	8	0	1	1	0	1	0	0	0	1	1	1	0	0	0	3799.77	5.27	2.28	0
66	2	35.78	71	158	62	96	5.2	200	6.9	142	4.1	273	28	1.9	317.367	7.22	1.4	9	4	37	26	15	9	1	0	0	0	1	0	0	1	1	1	1	0	0	0	1576.23	5.72	1.43	1
55	1	36.83	103	132	62	100	21.4	280	9.1	140	4.7	359	22	1.3	317.202	7.2	2.1	23	3	35	26	14	2	0	1	1	0	0	1	0	0	0	0	0	0	0	0	3218.68	6.54	1.14	0
77	2	36	105	144	97	99	16.3	158	14.1	145	3.7	221	21	0.8	317.178	7.32	4.7	17	5	54	38	10	5	1	0	1	1	0	0	0	0	0	0	0	0	0	1	8633.85	6.94	2.95	0
49	1	36.11	108	145	81	97	25.1	272	10.8	134	3.9	571	27	1.3	317.165	7.36	2.6	21	11	80	56	14	2	1	0	1	0	0	1	0	0	0	1	3	0	1	1	8708.41	17.21	12.93	0
48	2	36.44	101	130	75	97	14	735	10.1	146	4	141	26	0.8	317.119	7.3794	2.9625	15	2	54	23	15	4	0	1	0	1	0	0	0	0	0	1	2	0	0	0	3615.32	2.94	1.96	1
61	2	36.56	69	105	61	97	10.7	72	12.9	135	4.6	496	29	0.9	317.113	7.32	4.4	15	9	73	50	14	7	1	0	1	0	0	0	0	0	0	1	3	0	0	0	6081.5	9.97	4.87	1
60	1	36.22	68	84	30	100	15.2	221	8.5	136	3.7	267	64	4.9	317.09	7.2	1.3	23	9	56	43	10	7	1	0	1	0	1	0	0	0	1	1	3	1	1	1	5227.18	16.63	11.83	1
47	1	37.72	112	119	47	90	8.9	134	10.3	142	4	258	30	1.1	317.048	7.33	1.9	11	7	46	40	15	2	0	1	1	0	0	0	0	0	0	1	2	0	0	0	5619.47	16.59	7.76	0
58	1	37.5	70	149	80	96	9.1	260	11.3	141	4.6	364	15	0.7	316.779	7.36936	1.86831	13	1	22	20	13	3	0	1	0	1	0	0	0	0	0	0	0	0	0	1	-2961.68	9.03	1.95	1
55	1	36.83	82	119	53	95	8	270	8.1	130	5.2	224	95	7.8	316.773	7.1	0.9	21	5	50	35	15	7	0	1	0	0	1	1	0	0	1	1	3	1	0	1	3763.24	8.34	3.48	0
63	2	35.67	70	169	93	94	11	195	15.1	128	5.9	604	43	1.3	316.713	7.28	3	16	3	42	40	13	6	1	0	1	0	0	0	0	0	1	1	2	0	1	0	2926.79	9.07	2.99	1
64	2	36.44	74	138	61	99	13.1	587	8.3	138	3.7	445	24	1.6	316.694	7.36	1.9	15	3	43	28	14	7	0	1	1	0	0	0	0	0	1	0	0	0	0	1	4264.76	13.41	1.55	1
36	2	37.11	99	170	103	100	11.9	289	9.3	138	3.9	193	62	7	316.665	7.30207	1.90651	19	5	52	23	14	3	0	1	0	0	0	0	0	0	0	1	3	1	0	0	4377.83	2.95	1.19	1
76	2	36.5	74	101	83	99	10.5	177	11.8	140	4.4	257	38	1.6	316.649	7.29	2.2	16	2	51	33	14	8	1	0	0	0	0	0	0	0	1	1	2	0	0	1	4417.34	9.04	1.19	0
67	1	36.89	93	154	71	99	9.4	232	12.3	145	3.8	195	23	0.8	316.648	7.26	1.1	14	1	53	28	15	4	1	0	0	0	0	0	0	0	0	1	2	0	0	0	4214.3	6.91	3.96	0
46	1	36.83	83	170	130	100	9.7	246	14.6	144	4.1	278	14	0.7	316.644	7.41	1.92398	16	0	26	15	15	2	1	0	0	1	0	0	0	0	0	1	2	0	0	0	3634.31	3.07	1.78	0
60	1	39.67	110	108	59	98	17.1	317	11.5	144	4.3	193	26	1.6	316.608	7.46	2.6	19	9	58	40	15	2	1	0	1	0	0	0	0	0	0	1	3	0	1	1	7411.98	11.19	4.23	0
48	1	37.06	76	145	68	100	11.1	223	10.5	140	4	412	16	1	316.603	7.29	1.3	21	4	45	30	14	4	0	1	1	0	1	1	0	0	0	1	2	0	0	0	5463.72	15.32	3.32	0
74	1	37	84	146	73	97	9.1	194	9	135	5.4	342	47	1.7	316.586	7.37	1	22	5	44	42	13	8	1	0	1	0	1	0	1	0	1	1	1	0	0	1	-1176.36	6.64	2.53	1
66	1	32.67	89	93	54	100	24.1	507	10.9	130	6.6	316	72	9.2	316.47	6.89	19	30	11	116	72	15	4	0	0	1	1	0	1	0	0	0	1	3	1	1	1	6466.72	9.75	6.94	0
70	2	37.22	86	144	95	100	9.5	183	11.9	147	3.7	213	9	1	316.448	7.37	1.75594	13	3	17	26	15	3	0	0	0	1	0	0	0	0	0	1	2	0	1	1	3335.03	9.72	3.61	0
77	2	36.39	90	118	47	95	13.1	125	14	139	3.1	259	50	1.6	316.446	7.28	5.8	16	5	59	43	14	9	1	0	1	0	1	0	0	0	1	1	1	0	0	1	6801.03	4.06	2.3	0
78	1	38.56	92	126	64	100	12.2	341	12.4	143	3.9	297	17	1.4	316.371	7.4	3.7	17	4	55	41	15	9	1	0	1	0	1	0	1	0	0	1	3	0	1	1	5931.26	14.88	2.79	0
53	1	36.67	147	143	73	100	30.7	184	10	143	4.9	248	19	1	316.363	7.11	3.7	25	3	63	26	14	3	0	1	1	1	1	0	0	0	0	1	2	0	0	1	7816.83	4.74	1.71	0
51	2	36.56	94	109	66	96	14.3943	240.779	11.0373	140	4.6	206	44	1.4	316.359	7.30752	1.78538	20	2	46	29	15	2	1	0	0	0	0	0	0	0	0	0	0	0	0	0	4056.97	2.16	1.37	0
70	2	37.39	92	167	90	100	12.2	242	10.9	138	3.3	304	47	6	316.275	7.42	1.5	19	8	73	46	9	7	1	0	1	0	0	0	1	0	1	1	3	0	0	0	534.83	8.16	3.07	1
77	2	36.5	95	156	121	97	11.2	220	11.7	146	3.9	142	24	1.1	316.26	7.32	2.6	14	4	45	34	14	6	1	0	0	1	0	0	0	0	0	1	3	0	0	0	3050.94	8.01	2.2	0
48	1	36.17	111	118	78	100	21.3	211	9.6	140	4.6	339	23	1.1	316.248	6.96	1.5	25	3	77	26	14	2	0	1	1	0	0	0	0	0	0	1	2	0	0	0	7983.99	3.27	1.37	0
64	2	37.06	97	117	87	95	7.7	159	13.5	142	4.4	208	33	2.5	316.141	7.13	2.3	15	12	47	38	15	9	1	0	1	0	1	0	0	0	1	1	1	0	1	1	-1362.31	16.53	6.73	0
51	1	36.72	101	134	48	87	20.1	238	11.6	135	4.6	433	36	2	316.113	7.08	1.9	30	10	67	48	15	7	0	1	1	0	1	0	0	0	1	1	3	1	1	1	8685.7	16.82	16.78	0
74	1	36.78	68	112	51	98	7.4	130	9.4	139	4	394	23	1.6	316.103	7.35	6.2	23	10	38	37	15	11	1	0	1	0	1	0	0	1	1	1	1	0	1	1	4196.25	10.37	2.47	0
51	2	38.06	118	149	79	92	13.4	121	9.4	129	6.2	205	96	8.8	316.075	7.2	2.3	25	9	91	63	15	6	1	0	1	0	1	0	0	0	1	1	3	1	1	0	5891.59	18.82	11.83	0
63	2	37.78	117	199	102	99	12.4	178	9	146	4	160	20	1.8	316.032	7.36	2.2	13	4	62	31	10	7	1	0	1	0	0	1	0	0	1	1	1	0	0	1	2764.28	8.38	2.24	1
39	1	37.28	104	133	103	99	33.1	465	10.8	140	4	408	15	1.1	316.024	7.19	5.9	25	13	100	54	3	2	1	0	1	1	0	0	0	0	0	1	2	0	1	1	7497.34	13.54	13.5	1
50	1	37	115	151	91	98	10.6	140	12.1	135	4.1	539	22	1	316.002	7.46	1.1	14	3	43	34	15	2	0	0	1	1	0	0	0	0	0	1	1	0	0	1	4184.98	8.04	2.67	0
54	1	36.5	80	146	63	97	6.9	360	10.5	133	4.2	131	96	8	315.963	7.33	1.4	17	5	51	28	15	7	0	1	1	0	1	0	0	0	0	1	1	0	0	1	284.67	4.94	1.9	1
28	2	37.11	101	108	63	97	33.2	334	13.6	132	5	646	17	2.3	315.96	7.19	3.7	30	10	74	38	11	0	0	1	1	0	0	0	0	0	0	1	2	0	0	1	7261.28	3.92	2.13	0
66	2	36.94	68	177	70	100	15.8	166	14.9	140	4.9	323	23	1.6	315.959	7.3	3.2	18	7	43	39	15	6	1	0	1	1	0	0	0	0	0	1	3	0	1	0	11285.6	24.54	3.31	1
54	2	36.5	83	152	81	100	17.8	335	12.6	139	4.3	271	40	2	315.941	7.46	3.9	19	4	44	20	14	4	0	0	0	0	0	0	0	0	1	0	0	0	0	1	6392.84	3.83	1.85	1
80	2	36.83	98	111	61	87	14	223	10.4	139	4.5	205	49	1.8	315.889	7.28	1.9	18	4	54	55	15	8	1	0	1	1	1	1	1	0	0	1	2	0	1	1	-753.66	20.8	10.85	1
68	1	36.33	133	101	62	95	15.7	228	13	143	4.1	273	18	0.8	315.795	7.29	1.8	21	2	51	33	14	4	1	0	1	0	1	0	0	0	0	0	0	0	0	0	7662.44	7.54	1.62	1
29	2	36.56	85	171	90	100	15	200	10.3	142	4.3	263	24	2.2	315.783	7.34	1.6	19	3	35	13	15	4	0	1	0	0	0	0	0	0	1	0	0	0	0	0	4239.95	4.44	2.41	0
57	2	36.56	79	165	84	99	12.3	290	14.1	139	4.3	287	37	1.6	315.759	7.29	1.8	16	2	33	24	14	5	0	1	0	0	0	0	0	0	1	0	0	0	0	1	4117.13	4.83	1.11	0
47	1	37.39	99	187	139	100	8	225	8.7	148	3.5	126	16	1.3	315.714	7.39029	1.99299	12	5	56	28	9	4	0	1	1	0	0	0	0	0	1	1	3	0	0	1	3764.13	19.57	3.68	0
29	1	36.94	118	121	73	92	6.7	268	13.2	141	5.3	337	12	0.8	315.608	7.3146	3.25239	23	1	35	19	15	2	0	1	0	0	0	0	0	0	0	0	0	0	0	1	1196.65	1.46	1.41	0
43	2	37.06	105	132	74	98	18.7	318	9.1	136	8	251	38	0.8	315.516	7.45	4.6	6	5	55	36	15	0	0	1	1	1	0	0	0	0	0	1	1	0	0	0	67.36	29.76	2.66	0
55	1	37	107	167	82	95	23.9	312	9.7	145	3.9	220	15	1	315.379	7.37	1.7	15	1	34	26	15	7	1	0	0	0	1	0	0	0	1	1	1	0	0	0	3169.62	26.22	1.28	0
60	2	37.5	103	125	60	100	14.6	199	14.1	133	5.7	529	24	1	315.36	7.22	1.9	28	4	58	38	13	7	0	1	1	1	0	0	0	0	0	1	2	0	1	1	5364.24	39.86	25.11	0
63	1	37.83	122	132	80	95	18.1	373	10	130	4.5	513	50	1.7	315.357	7.19	2.4	21	8	59	54	15	3	0	0	1	1	0	0	0	0	0	1	3	0	0	1	12737.2	43.59	7.63	0
21	2	36.78	90	115	46	96	15.6	243	12.3	145	4.7	197	14	0.9	315.344	7.35	0.9	18	2	40	19	15	0	0	1	0	0	0	0	0	0	0	0	0	0	0	0	2519.93	2.67	1.61	0
65	1	36.5	114	111	66	100	19.7	285	11.4	140	3.7	303	31	0.8	315.305	7.26	1.2	19	1	40	34	15	4	1	0	0	0	0	0	0	0	0	0	0	0	0	0	5339.47	5.38	2.63	0
32	2	37	118	187	111	100	10.4	216	11.5	142	2.9	285	27	8.3	315.276	7.33397	1.79386	18	5	55	19	14	4	0	1	0	0	0	0	0	0	0	1	1	0	0	0	4764.37	3.8	3.7	1
60	1	36.78	96	124	56	100	16.8	157	9.9	142	3.8	315	17	0.7	315.171	7.33716	1.58484	17	2	36	28	13	2	0	1	1	1	0	0	0	0	0	0	0	0	0	1	3158.43	4.62	2.01	0
47	2	36.83	97	115	77	96	21.1	170	12.6	141	4.4	175	41	1.4	315.165	7.37	2.41194	13	2	51	28	15	0	0	1	0	0	0	0	0	0	0	0	0	0	0	1	2545.71	3.56	1.21	0
54	1	37	129	106	55	96	22	258	11	134	4.4	489	31	1.6	315.038	7.2732	3.1	20	6	57	36	14	6	0	1	0	1	0	0	0	0	0	1	1	0	0	1	7464.69	5.08	3.23	1
67	2	36.5	98	104	73	96	6.4	158	13.5	138	5.1	326	30	1.5	315.025	7.35	1.1	12	3	46	45	13	7	1	0	0	0	1	0	0	0	1	1	2	0	0	1	6249.89	9.26	4.35	0
74	2	37.11	113	143	56	98	18.4	197	12.3	130	3.8	634	34	1.6	314.965	7.29	3.5	33	2	49	39	15	5	0	1	0	1	0	0	0	0	0	1	2	0	0	0	5366.7	4.97	1.88	0
50	2	37.06	110	141	58	100	6.6	187	11.8	131	3.7	466	55	1.7	314.932	6.96	0.7	21	9	84	46	15	4	1	0	1	1	0	0	0	0	0	1	2	0	1	1	7162.1	13.73	8.58	0
30	1	37.5	98	172	109	99	8.4	342	11.1	143	4.2	118	39	11.4	314.884	7.34	2.2	20	6	73	32	10	4	0	1	0	0	0	0	0	0	0	1	2	0	0	0	2567.83	2.97	1.88	1
58	2	36.67	110	173	91	99	10.1	242	9.8	143	4.8	141	32	1.8	314.862	7.30748	2.01407	14	1	40	40	15	11	0	1	0	0	0	0	1	0	1	1	1	0	0	1	2118.14	4.16	1.82	0
65	2	37.11	76	102	40	98	14.5	386	10.7	146	5.9	109	14	0.9	314.856	7.37	1.52246	9	2	41	29	14	3	0	1	0	1	0	0	0	0	0	0	0	0	0	0	2987.87	4.81	1.49	1
71	1	37.06	78	162	61	97	10.8	266	9.1	141	4.9	217	30	1.6	314.57	7.26	0.9	20	2	45	32	15	10	0	1	1	0	1	1	1	0	1	0	0	0	0	1	-2183.33	5.6	1.73	0
56	1	36.78	117	95	63	94	3.2	82	10.4	141	3.2	387	13	0.8	314.543	7.41	4.7	20	18	116	64	3	6	1	0	1	0	0	1	0	0	0	1	3	0	1	1	4968.1	28.32	16.1	0
53	1	36.67	85	121	58	99	5.9	190	11.6	134	9.7	302	29	0.9	314.535	7.31	1.8	7	1	28	32	15	8	0	1	1	1	0	1	0	0	0	0	0	0	0	0	248.77	1.62	1.12	1
69	1	38.67	146	98	60	99	15.4	150	8.7	134	5.4	161	75	5	314.53	7.33	1.8	18	12	98	71	15	5	1	0	1	0	0	1	0	0	0	1	3	1	0	1	13369	115.63	32.77	1
73	1	36.89	107	102	55	98	16.1	341	11.4	131	5.4	413	52	1.2	314.316	7.34	2.23831	18	3	53	53	13	6	1	0	1	0	1	0	0	0	0	1	2	0	0	0	2498.55	8.18	3.03	1
76	2	37.44	110	127	60	97	23.2	263	12	137	4.1	404	27	1.5	314.287	7.32	2.53173	16	5	86	48	6	8	1	0	0	0	0	0	0	0	1	1	2	0	1	0	3286.39	9.52	4.02	0
69	2	37	105	117	52	98	12.7	163	10.6	135	4.4	362	43	1.4	314.268	7.39	1.6	10	3	57	38	13	6	0	1	0	1	0	0	0	0	0	1	2	0	0	0	5010.71	6.86	2.77	0
23	2	36.83	137	140	92	100	22.9	312	13.8	142	4.8	261	17	0.9	314.171	7.18	2.36236	30	0	50	18	15	0	0	1	0	0	0	0	0	0	0	0	0	0	0	0	3431.1	3.51	1.78	0
54	2	36.78	94	149	96	95	12.6	195	15.6	140	5.3	269	24	1.3	314.116	7.39	2.3	22	1	41	16	15	2	1	0	0	1	0	0	0	0	0	1	1	0	0	0	1635.33	3.35	2.05	0
69	2	37.06	98	130	56	100	14.1	253	14	135	5.1	467	22	1.2	314.002	7.29	1.1	20	4	42	29	15	6	0	1	1	1	0	0	0	0	0	1	1	0	0	0	6281.58	9.87	4.17	0
72	2	36.44	82	194	79	99	16	143	11.6	134	5	217	67	7.4	313.984	7.37	7	26	6	33	45	13	7	1	0	0	0	0	0	0	0	1	1	3	0	0	0	3285.41	4.81	1.46	0
41	1	37.56	134	111	51	100	32.6	238	11.6	141	3.9	306	20	1	313.943	6.98	1.5	23	2	61	30	15	3	0	1	0	0	0	0	0	0	0	0	0	0	0	1	13557.9	1.53	1.51	0
27	2	37.5	87	123	67	98	17	157	11.5	142	3.9	109	45	1.8	313.927	7.42	1.1	16	2	37	17	15	1	0	1	1	0	0	0	0	0	0	0	0	0	0	1	1169.85	3.95	1.08	0
32	2	36.89	101	128	86	96	10.8	250	13.5	132	4.5	620	18	1	313.873	7.31	1.89104	21	2	34	9	14	1	0	0	0	1	0	0	0	0	0	0	0	0	0	1	4823.72	4.92	1.83	0
61	2	37.11	119	182	83	96	11.5	119	13.3	141	4.5	199	33	1	313.841	7.5	2.2	24	4	56	36	11	4	0	0	0	1	0	1	0	0	0	1	1	0	0	0	3467.28	6.8	2.62	0
73	1	36.5	95	132	61	99	8	218	8.5	140	4.8	102	52	1.4	313.838	7.29	1.9	14	2	46	38	15	9	0	1	1	0	1	1	0	0	1	0	0	0	0	1	1738.66	5.98	1.04	1
51	1	37.33	109	159	81	99	16.3	410	12.1	143	3.8	287	12	0.7	313.83	7.36	4	18	1	27	21	15	3	1	0	0	0	0	0	0	0	0	0	0	0	0	0	5867.44	10.42	1.67	0
46	2	36.72	108	150	91	100	16.4	275	13.1	138	5.4	337	23	1.7	313.737	7.14	2.8	32	2	40	26	15	1	0	1	0	1	0	0	0	0	0	1	1	0	0	1	6616.26	3.93	2.07	0
73	1	37.11	87	171	86	99	10.7	118	11.1	142	3.9	278	18	0.7	313.673	7.42	1.4	15	2	29	26	14	6	1	0	0	1	0	0	0	0	0	0	0	0	0	0	-97	9.01	1.06	0
43	2	36.33	128	118	80	99	21.8	131	12.6	135	3.8	217	67	2.3	313.584	7.25	1.3	22	8	89	38	9	1	0	1	1	0	0	0	0	0	0	1	2	0	1	0	6124.08	17.74	9.02	0
27	2	36.11	135	74	42	98	4.5	43	15.4	133	7.1	225	58	2.6	313.414	7.11	6.6	29	17	108	51	15	0	0	1	1	0	0	0	0	0	0	1	3	1	1	1	34546.1	1.57	1.64	1
53	2	38	114	137	86	94	20.6	209	12.6	141	3.6	184	39	5	313.351	7.49	3.4	23	5	53	30	15	9	0	1	1	0	1	0	1	0	0	1	1	0	0	0	4439.56	7.33	1.82	1
54	2	37.67	121	166	74	98	10.1	278	12.5	142	4.5	172	30	1.6	313.27	7.41	2.4	15	1	45	23	15	5	1	0	0	0	0	0	0	0	1	0	0	0	0	0	-699.91	3.42	1.49	0
56	2	37.17	88	119	67	100	11.9	404	9.9	134	5.4	438	28	1.2	313.133	7.32	1.96168	22	3	65	38	14	5	0	1	1	1	0	0	0	0	0	1	1	0	0	0	5582.97	7.69	1.02	0
38	2	36.44	117	176	111	99	13.7	157	12.1	135	9.4	290	23	1.3	313.125	7.14	2	25	3	41	14	15	1	0	1	0	0	1	0	0	0	0	0	0	0	0	1	7829.54	7.69	2.68	1
73	2	35.17	81	99	62	98	15	228	11.9	140	4.7	112	49	2.3	313.122	7,31	1.4	17	5	52	38	15	4	1	0	1	1	0	0	0	0	0	0	0	0	0	1	5308.01	6.79	1.74	1
24	1	38.22	122	104	52	96	13.3	234	11.3	143	3.5	268	14	0.9	312.889	7.20899	3.00065	31	1	48	25	15	1	0	1	0	0	0	0	0	0	0	0	0	0	0	0	7482.1	3.9	2.73	0
70	2	37	98	127	54	99	12.3	123	8.1	130	4.3	488	48	2.1	312.854	7.35	8.9	23	11	60	50	15	6	0	1	1	1	1	0	0	0	0	0	0	0	1	1	-1686.3	10.13	7.17	1
56	2	36.67	120	152	76	99	6.4	141	9.3	131	4.5	251	78	4	312.802	7.25	2.8	44	6	55	36	15	1	0	1	0	1	0	0	0	0	0	0	0	0	0	0	3651.94	4.84	2.58	0
50	2	36.39	98	114	73	93	4.3	329	13.8	133	5.1	517	22	1.3	312.779	7.38	2.6	14	1	37	16	15	4	0	0	0	0	1	0	0	0	0	0	0	0	0	0	2558.2	4.9	1.17	0
59	2	36.61	114	117	71	97	5.9	41	12	142	3.7	224	25	1.8	312.773	7.47	2.8	13	11	67	40	15	13	1	0	0	0	1	0	0	1	1	1	3	0	1	0	4065.58	22.15	4.93	1
68	1	36.83	77	103	45	98	33.3	429	8.9	144	3.3	171	24	0.8	312.671	7.41	1.4	15	1	42	28	15	3	0	1	0	1	0	0	0	0	0	1	1	0	0	1	3332.2	5.65	1.59	1
55	2	36.61	98	110	62	97	9.3	216	11.2	139	4.8	213	37	1.7	312.648	7.28	1.2	17	3	37	30	15	4	0	1	1	1	0	0	0	0	0	0	0	0	0	1	8279.25	1.52	1.54	0
66	2	36.5	109	157	80	98	8.5	140	13.2	139	4.4	317	23	1.1	312.625	7.15	1.2	30	4	40	37	14	10	1	0	0	0	0	0	0	0	0	0	0	0	0	0	9397.15	7.69	2.13	0
64	1	36.39	118	132	82	97	7.3	206	10.7	137	5.1	344	26	0.7	312.597	7.28	1.3	26	2	41	43	15	6	1	0	0	0	1	1	0	0	0	1	1	0	0	1	2729.31	15.84	2.55	1
54	2	36.72	65	138	96	95	6.1	167	12.3	137	4.7	339	29	1.4	312.59	7.42	2.2	18	3	56	37	13	2	0	0	0	1	0	0	0	0	0	1	2	0	0	0	4467.49	11.03	2.2	0
55	2	37.28	76	120	59	97	6.6	98	12.3	134	5.6	498	16	0.8	312.581	7.4	2.6	14	5	37	26	15	5	1	0	1	1	0	0	0	0	0	1	3	0	1	0	3147.51	6.07	4.13	1
70	2	37.39	108	106	46	98	36.1	248	11.2	139	4.6	270	29	3	312.557	7.23	1.6	27	6	89	64	15	8	1	0	1	0	0	0	0	0	0	1	3	1	1	1	2534.19	40.02	2.83	1
20	1	37.11	133	141	77	100	10.5	156	11.6	142	4.5	281	11	1	312.54	7	2.6	19	4	35	15	15	1	0	1	0	0	0	0	0	0	0	0	0	0	0	0	4215.9	3.32	2.54	0
77	1	36.33	81	117	47	100	6.3	302	7.2	137	3.2	237	53	2.7	312.495	7.13	1.4	17	8	97	54	11	10	1	0	1	0	1	1	1	1	1	1	3	0	0	1	653.25	15.79	2.99	1
74	2	37.17	102	102	60	94	6.1	93	4.8	136	4.5	374	30	1.1	312.492	7.4	2.56767	14	4	38	32	15	7	1	0	0	0	0	0	0	0	1	1	2	0	0	1	2940.71	4.64	1.53	0
42	1	36.72	83	137	109	98	9.3	255	13.9	143	4.8	246	9	0.9	312.481	7.37	0.9	17	1	29	20	15	1	1	0	0	1	0	0	0	0	0	1	2	0	0	1	4007.75	3.61	2.72	0
69	1	37.28	82	156	88	92	23.7	299	16.1	138	4.3	404	15	1	312.402	7.3	1.9	22	4	31	36	15	4	1	0	0	1	0	0	0	0	0	1	1	0	1	0	4717.44	1.03	1.02	1
54	2	36.83	104	141	87	98	18.1	278	12.7	135	5.5	391	27	1.4	312.365	7.38	1.2	22	4	46	20	14	8	1	0	1	0	1	0	0	0	1	0	0	0	0	0	5958.41	6.9	2.9	1
78	1	35.78	85	128	72	96	14.3	185	15.2	142	3.6	226	24	0.3	312.327	7.37	1.40054	12	1	23	33	14	10	1	0	0	1	0	0	0	0	0	0	0	0	0	1	3864.73	4.44	4.01	1
70	2	36.44	142	166	105	100	13.7	227	12.4	138	4.1	409	15	0.9	312.279	7.43	4.9	17	4	67	40	7	4	1	0	1	1	0	0	0	0	0	0	0	0	0	1	4648.14	6.9	1.7	1
66	2	36.39	96	94	74	97	28.8	272	17.3	134	4.4	535	16	1.3	312.237	7.26	4.7	22	9	82	56	15	9	1	0	0	0	1	1	0	0	1	1	3	1	1	1	6625.82	1.58	1.66	1
66	2	37.17	96	146	64	99	25.1	301	13.9	140	4.5	257	25	1	312.206	7.36	2.5	20	5	60	30	10	4	1	0	1	1	0	0	0	0	0	1	2	0	0	1	2123.33	14.99	1.06	1
46	2	35.83	99	97	69	100	17.5	255	5.4	137	5.5	218	42	3.9	312.111	7.28	7.4	30	12	78	64	13	5	0	1	1	1	0	0	0	0	0	1	3	1	1	1	6359.45	2.18	2.2	1
50	2	37.39	106	175	91	100	12	379	9.7	135	4.3	326	43	1.7	312.068	7.34581	0.6	12	3	56	21	14	4	0	1	0	0	0	0	0	0	1	0	0	0	0	0	3417.86	5.36	2.21	0
53	1	37.44	66	121	38	96	8.2	168	10.1	138	3.5	220	47	1.6	312.008	7.3754	2.06403	15	2	55	25	15	5	0	1	0	0	1	0	0	0	1	1	2	0	0	0	4470.29	3.3	1.44	1
52	1	36.78	109	142	78	99	9.6	329	10	135	4.7	271	49	1.4	311.956	7.29	1.4	19	3	46	30	14	5	0	1	0	0	1	0	0	0	0	1	1	0	0	0	6348.51	9.59	2.64	0
70	2	36.5	89	129	78	95	52.9	362	13.5	133	4.5	393	42	0.8	311.833	7.45	2.7	15	7	76	45	14	6	1	0	1	0	0	0	0	0	0	1	1	0	0	1	4503.16	8.77	2.85	0
58	2	37.11	114	126	72	96	9.7	36	10.2	137	4.6	315	31	2.5	311.771	7.31	9.4	8	10	83	38	10	4	1	0	1	0	0	0	0	0	0	1	3	0	0	0	5601.95	13.47	1.28	1
77	1	37.28	110	121	65	97	15.5	262	10.8	145	3.3	137	21	0.6	311.711	7.47	1.2	13	4	69	41	9	9	1	0	1	1	0	0	1	0	0	1	2	0	0	0	1572.3	11.09	6.07	1
38	1	37.17	101	154	79	100	8.4	120	8.6	144	2.7	282	7	0.7	311.567	7.11	0.7	18	1	27	15	15	2	1	0	0	1	0	0	0	0	0	1	2	0	0	0	4334.86	5.59	2.63	0
56	2	37.44	93	164	111	97	12.5	219	15.3	133	3.9	538	22	2	311.546	7.23	5.4	16	8	35	24	15	6	0	0	0	1	1	0	0	0	1	1	3	0	1	1	-36.31	14.91	2.33	0
75	2	36.72	101	193	92	100	14	174	10.3	132	3.9	436	43	2.9	311.379	7.36	3	20	5	56	32	14	7	0	0	1	0	0	0	0	0	1	1	1	0	0	1	3473.69	7.76	1.04	1
41	2	36.67	144	135	90	97	13.5	183	11.7	143	2.8	256	15	1.2	311.179	7.47	1.50334	14	1	46	27	15	2	0	1	0	0	0	0	0	0	0	0	0	0	0	1	2899.96	7.35	7.32	0
56	1	36.56	58	142	64	98	7.6	272	12.2	138	3.6	291	33	1.6	311.152	7.51	2.17124	19	3	39	23	14	3	1	0	0	1	0	0	0	0	0	1	1	0	0	1	3876.08	6.72	3.7	0
73	2	35.72	94	111	59	100	18.9	161	6.9	137	5.9	268	29	3.1	311.046	6.94	17	29	4	39	37	15	7	1	0	1	1	0	0	0	0	1	1	1	0	0	1	4185.31	14.63	1.77	0
21	2	37	139	111	63	100	18.1	358	11.7	144	5.2	131	15	0.8	311.035	7.18	5.2	24	3	36	29	15	1	0	1	0	0	0	0	0	0	0	0	0	0	1	0	22573.7	4.28	2.52	0
76	2	36.72	87	111	57	98	7.5	190	13.2	137	4.2	360	24	1.1	310.971	7.37619	1.90853	19	1	38	36	14	5	1	0	1	1	0	0	0	0	0	1	2	0	0	1	727.23	11.99	5.8	0
39	1	36.83	119	180	101	97	27	780	12.7	146	3.7	163	7	0.8	310.956	7.36099	2.54198	17	0	51	26	15	2	1	0	0	1	0	0	0	0	0	0	0	0	0	0	4144.9	12.41	1.97	1
45	2	36.5	115	133	77	99	12.6	233	13.1	134	4.8	394	32	1.4	310.917	7.42	1.4	23	1	42	22	15	5	0	1	0	0	1	1	0	0	0	1	2	0	0	1	5575.87	11.02	2.71	0
50	1	37.22	120	123	65	100	16.4	165	13.1	142	4	263	12	1	310.897	7.14	1.6	24	2	33	27	15	1	1	0	0	0	0	0	0	0	0	0	0	0	0	1	4190.37	5.11	2.53	0
78	2	37.06	75	144	57	96	5.1	182	11.5	135	3.9	300	46	1.6	310.895	7.43	1.9	14	3	55	35	15	8	1	0	0	0	0	0	0	0	1	1	2	0	0	1	6426.29	4.89	2.02	0
58	2	37.44	103	135	83	91	13.8	263	9.8	132	4.2	365	51	2.8	310.892	7.36	1.3	22	3	47	26	15	3	0	0	0	1	0	0	0	1	0	1	2	0	0	1	4834.15	9.37	3.56	0
34	2	36.94	90	117	70	100	13.5	211	9.6	131	5.4	422	41	1.8	310.887	7.36	2.1	23	5	73	29	15	3	0	1	0	1	0	1	0	0	0	1	1	0	0	1	4969.79	3.52	1.81	0
50	2	36.28	118	153	77	100	10.2	160	12.6	129	4.7	615	26	1.5	310.852	7.14	2.5	42	4	43	31	14	0	0	1	0	1	0	0	0	0	0	0	0	0	0	1	4854.16	5.2	3.48	1
55	2	36.94	89	125	71	98	13.6	228	12.5	140	4.3	304	15	0.6	310.846	7.4	1.8	14	1	26	24	15	2	1	0	1	1	0	0	0	0	0	1	2	0	0	1	2571.4	20.94	3.28	0
71	2	36.11	68	143	70	100	8.1	379	10.6	133	5.5	88	81	2.1	310.817	7.34271	1.5	17	4	57	42	14	7	1	0	1	0	0	0	0	0	1	1	1	0	0	1	1943.47	2.96	1.27	1
68	1	36.83	96	104	78	96	8.1	222	11.1	130	4.2	517	38	0.9	310.694	7.34	2.3	12	1	39	40	15	7	1	0	0	1	0	0	0	0	0	1	1	0	0	0	2416.77	2.88	1.01	1
43	1	35.61	67	87	56	100	9.2	160	8.7	141	5	149	29	3.4	310.635	7.11	2.3	31	5	85	50	13	4	0	1	0	0	0	0	0	0	1	1	2	0	0	0	5761.75	4.79	4.76	0
46	2	36.94	102	167	85	99	29.3	309	14.7	140	4.5	325	10	1	310.627	7.26	9.5	27	7	73	57	5	2	1	0	1	0	0	0	0	0	0	1	2	0	1	1	6146.63	22.74	21.94	0
46	2	37.06	103	136	70	100	16	288	14.4	136	3.6	398	26	1.2	310.597	7.31	3.2	13	1	42	16	15	2	0	1	1	0	1	0	0	0	0	0	0	0	0	0	4472.87	15.82	1.05	0
33	2	36.56	105	93	61	100	11.6	287	11.5	139	4.7	250	26	1.2	310.575	7.26	2.6	27	3	39	27	14	0	0	1	1	0	0	0	0	0	0	1	1	0	1	0	3165.17	4	4.02	0
38	2	38.44	90	136	48	99	8.3	186	8.5	134	4.5	250	55	11.6	310.532	7.30565	1.1	29	5	66	34	15	5	0	1	1	0	0	0	0	0	0	1	3	0	0	0	1676.8	8.74	3.84	0
32	1	37.11	125	128	78	100	19.8	232	12.7	144	3.8	230	6	0.9	310.521	7.11	1.8	24	3	28	24	14	1	0	1	0	1	0	0	0	0	0	1	2	0	0	1	3757.77	13.44	2.65	0
69	2	37.67	118	154	59	98	21.5	124	9.5	133	4.5	323	49	3.1	310.444	7.23	3.6	23	6	62	41	15	8	1	0	1	0	1	0	1	1	1	1	2	0	0	1	171.67	19.82	1.63	0
60	2	38.67	84	142	91	93	4	123	12.1	132	4.6	252	65	3	310.414	7.35911	1.6	24	5	46	24	14	6	0	1	1	0	0	0	0	0	1	1	1	0	0	0	2294.57	10.86	1.73	0
71	2	36.89	76	149	67	100	11.2	276	7.2	134	5	325	40	1.9	310.341	7.4	1.3	11	4	51	48	14	11	1	0	1	0	1	0	0	0	1	0	0	0	0	0	5367.95	17.6	1.95	1
65	2	36.56	62	122	74	100	8.7	82	14.6	140	3.5	310	17	1.5	310.294	7.21	2.5	25	8	46	38	15	6	1	0	1	1	0	0	1	0	0	1	3	0	1	0	6397.69	6.76	4.04	0
28	2	36.72	93	107	47	100	13.8	164	11	138	4.5	301	24	1.1	310.294	7.29	1.4	11	2	40	8	15	1	0	1	0	0	0	0	0	0	0	0	0	0	0	0	-397.13	1.7	1.65	0
68	1	36.83	80	128	59	100	8.1	156	13.3	137	4	444	10	0.8	310.238	7.44	2	19	6	26	44	8	7	0	0	1	0	1	0	0	0	0	1	2	0	0	0	4280.71	9.65	6.91	1
55	1	36.67	105	146	52	98	19.7	317	10.7	139	4.6	260	24	1	310.216	7.22	1.4	21	4	39	23	15	1	0	1	0	0	0	0	0	0	0	0	0	0	0	0	2867.51	1.41	1.35	0
47	1	36.78	69	104	59	98	4.2	158	7.4	139	2.8	376	16	0.6	310.203	7.28	1.1	14	3	30	28	15	1	0	1	0	0	0	0	0	0	0	1	1	0	0	1	4318.29	2.72	1.63	0
55	1	36.89	93	115	46	95	4.8	165	7.4	132	4.6	273	61	4.3	310.152	7.32158	1.92388	21	5	58	28	14	5	0	1	1	0	0	0	0	0	1	1	3	0	0	0	3617.58	7.81	1.83	0
70	1	37.22	96	86	64	98	8.2	100	11.5	139	4.3	314	17	1	310.116	7.39	1.3	15	6	46	40	12	12	1	0	1	1	0	0	0	0	0	1	2	0	0	1	4117.22	7.18	2.97	0
79	1	36.44	70	117	46	98	22.8	324	9.4	140	3.8	218	29	0.9	310.068	7.39	2.40253	11	5	68	55	8	6	1	0	1	0	0	0	0	0	0	1	2	0	0	0	3561.98	9.94	2.27	0
25	1	36.56	105	99	62	98	10.6	313	10	143	4.7	154	17	0.9	310.027	7.30253	0.8	13	1	34	16	15	1	0	1	0	0	0	0	0	0	0	0	0	0	0	0	4823.48	3.23	1.41	0
57	2	36.78	78	137	81	99	23.5	395	8.2	133	4.7	121	78	4.3	309.979	7.21	4.2	14	4	57	36	15	5	1	0	1	0	0	0	0	0	1	1	2	0	0	0	7646.36	15.09	1.12	0
71	2	36.5	108	99	73	97	18.4	99	10.9	138	4.5	301	23	1	309.937	7.4	2.6	12	5	44	34	13	3	0	0	1	0	0	0	0	0	0	1	1	0	0	0	3674.63	19.56	1.17	0
59	2	37.22	119	142	76	97	5.4	113	8.6	138	4.1	250	33	1.9	309.875	7.37	2.2	19	4	45	31	13	2	1	0	0	0	0	0	0	0	0	0	0	0	0	0	4762.68	4.63	2.81	1
61	2	36.72	111	135	80	97	6.5	170	10.8	138	3.4	275	33	0.5	309.863	7.29097	5.1	27	2	57	43	11	8	0	0	1	0	0	0	0	0	0	0	0	0	0	1	2916.57	7.05	2.96	1
58	2	36.17	81	120	78	99	4.1	287	10.4	134	4.8	156	66	2.9	309.838	7.29	7.9	17	3	58	37	15	4	0	1	1	0	0	0	0	0	1	0	0	0	0	0	3880.44	14.98	1.23	0
53	2	36.89	148	114	88	98	13.5	215	15.1	140	4.1	177	33	1.1	309.819	7.3	1.2	23	3	55	34	12	4	1	0	1	1	0	0	0	0	0	1	1	0	0	1	4801.64	12.5	5.93	0
69	2	36.94	86	155	78	99	9.2	179	9.8	138	2.6	213	47	2.4	309.819	7.19	2.5	14	3	54	39	15	5	1	0	0	1	0	0	0	0	0	0	0	0	0	1	871.34	6.1	1.04	1
45	2	37.5	123	217	120	93	12.3	281	15.9	140	3.7	313	14	0.9	309.789	7.44	1.6	15	5	62	24	11	4	1	0	1	1	0	0	1	0	0	1	2	0	1	0	1983.51	35.65	28.7	0
37	1	37.17	97	158	102	98	12.9	223	8.6	138	3.4	125	56	4.9	309.744	7.35	2	14	5	53	25	13	5	0	1	0	1	0	1	0	0	0	1	1	0	0	1	3571.49	3.16	1.77	0
71	1	38.61	108	116	47	96	10.8	351	7.6	140	4	192	31	1.8	309.738	7.35	0.8	16	2	45	37	15	6	0	0	1	0	1	0	0	0	0	1	2	0	1	0	-847.92	10.91	6.79	0
66	1	35.83	106	76	45	98	2.6	211	12.4	140	3.9	259	21	1.1	309.689	7.05	5.9	16	9	72	47	15	6	1	0	1	1	0	0	0	0	0	1	2	0	1	1	4860.91	29.42	29.42	1
63	2	36.72	104	177	102	92	13.9555	242.84	12.4334	139	4.4	135	43	1.5	309.657	7.31	2	20	4	53	32	14	3	1	0	1	1	0	0	1	0	0	1	1	0	0	0	4477.24	8.09	1.76	0
77	1	36.89	83	121	80	99	11.4	112	8	136	5.1	262	36	1.2	309.613	7.36	1.9	10	4	46	45	13	5	1	0	1	1	0	1	0	0	0	1	3	0	0	0	3118.8	18.99	3.75	1
49	2	38.06	128	112	67	98	2.9	66	10	134	2.9	490	24	2.4	309.594	7.2	7.4	22	17	84	56	15	3	1	0	1	0	1	1	0	0	0	1	3	1	1	1	13879.5	11.89	6.02	0
68	2	37.06	90	151	67	100	27.9	385	11.2	127	7.6	508	34	2.4	309.565	7.41	3.2	24	7	42	46	15	7	1	0	1	0	0	1	0	0	1	0	0	0	1	1	3860.87	3.79	2.6	0
60	2	36.78	131	146	83	92	14.8	971	7.5	136	5.7	335	21	0.6	309.511	7.38	1.9	17	3	44	33	14	6	1	0	0	1	0	0	0	0	0	1	1	0	0	0	3828.56	30.19	2.47	0
79	1	36.94	75	147	97	96	15.3	206	9.5	137	4.7	148	50	2	309.479	7.44	2.26847	22	3	56	41	15	5	1	0	0	1	0	0	0	0	0	1	2	0	0	1	3797.45	3.03	1.34	0
50	1	37.06	123	194	107	100	9.5	361	7.8	143	3.6	106	29	1.7	309.446	7.3923	1.87963	16	1	50	26	15	3	0	1	0	1	0	0	0	0	0	0	0	0	0	1	2672.79	5.1	1.88	1
22	1	37.22	96	119	68	100	9.7	322	12.6	141	3.9	288	10	0.6	309.371	7.07	2.64422	24	2	34	19	14	1	0	1	0	0	0	0	0	0	0	0	0	0	0	1	2956.07	4.72	1.01	0
30	2	36.83	105	139	61	99	7.3	234	11.8	133	5	484	18	1.2	309.317	7.38	1.3	33	2	33	14	15	0	0	1	0	0	0	0	0	0	0	0	0	0	0	1	1474.72	1.57	1.52	0
27	1	36.94	99	108	62	97	12.1	330	13.9	140	3.9	297	14	0.6	309.3	7.32769	2.74842	13	1	44	11	15	3	0	1	0	0	0	0	0	0	0	0	0	0	0	1	2644.06	22.04	1.18	0
43	2	37	135	112	68	93	14.6	801	7.5	134	3.9	288	49	2.2	309.3	7.39	7.9	22	4	53	28	14	1	0	0	0	1	0	0	0	0	0	1	1	0	0	1	2895.94	4.95	1.74	1
36	1	37.17	115	136	83	99	10.7	209	11.2	142	3.6	197	20	0.8	309.287	7.30629	1.6	14	1	39	11	15	3	0	1	0	1	0	0	0	0	0	0	0	0	0	0	5033.01	3.2	2.34	1
71	2	36.67	85	149	78	92	7.8	197	12.9	133	4.8	407	31	1.2	309.283	7.33954	1.39632	13	1	31	32	15	6	1	0	0	1	0	0	0	0	0	0	0	0	0	1	-22	4.99	1.93	0
72	1	36.44	120	168	106	98	13.5	625	11.2	137	4.8	391	11	0.7	309.251	7.41	3.7	21	4	65	44	14	7	0	1	1	1	0	0	0	0	0	1	2	0	1	1	6874.72	14.75	4.02	1
60	1	37.17	88	134	83	99	10.6	264	10.9	139	4.1	324	14	1.1	309.2	7.41	2.43648	17	2	35	26	15	3	1	0	0	1	0	0	0	0	0	1	2	0	0	1	4193.77	3.8	3.77	0
52	2	36.83	108	140	83	100	7	158	11.4	142	4	187	19	1.3	309.175	7.26	1.7	22	2	33	23	15	4	0	1	0	1	0	0	0	0	0	0	0	0	0	0	8568.59	2.18	2.15	0
48	1	37.67	106	190	79	98	13.1	362	11.4	143	3.5	194	15	1	309.135	7.38	0.9	17	4	60	37	8	2	1	0	1	1	0	0	0	0	0	1	2	0	1	1	3032.9	14.9	5.67	0
70	1	36.94	79	150	106	100	11.3	480	8	133	4.7	305	47	1.9	309.13	7.36067	2.64082	14	2	41	29	15	4	1	0	0	0	0	0	0	0	0	1	1	0	0	0	4752.25	8.06	3.14	0
78	2	36.61	93	114	68	96	17.9	452	13.5	140	4.5	212	23	0.9	308.992	7.6	4.6	10	2	50	33	14	8	1	0	0	0	0	0	0	0	1	1	2	0	0	0	3550.9	10.53	1.35	1
56	1	36.67	121	138	103	95	33.5	367	12.2	137	3.5	433	11	0.7	308.984	7.29147	3	29	0	30	25	15	2	1	0	0	0	0	0	0	0	0	0	0	0	0	1	5572.36	5.1	1.97	0
66	2	36.39	88	145	64	99	8.4	283	7.1	135	4.6	207	51	3.1	308.914	7.46	1.58684	19	3	45	29	15	8	1	0	1	0	0	0	0	0	1	0	0	0	0	1	1868.53	22	1.13	1
39	2	36.39	121	151	78	100	14	178	11.6	140	3.8	287	15	1.1	308.902	7.30509	3.8	25	1	43	23	15	3	0	1	0	1	0	0	0	0	0	0	0	0	0	0	7765.83	7.99	2.11	0
61	1	36.56	115	140	86	96	8.9	326	10.2	129	5.2	523	32	1	308.884	7.29795	6.4	24	1	41	50	15	9	0	0	0	0	0	0	0	0	0	1	2	0	0	1	3027.5	5.3	2.57	1
72	1	36.61	113	130	84	95	13.5	215	8.3	138	4.6	168	40	1.7	308.819	7.4	3.3	22	4	90	60	10	14	1	0	1	0	0	0	0	1	1	1	2	0	0	0	5783.26	9.88	3.34	1
43	2	37.11	89	136	85	99	6.4	164	13.3	138	4.6	295	20	1.1	308.732	7.17	1.8	22	2	27	25	15	0	0	1	0	0	0	0	0	0	0	0	0	0	0	0	4537.63	4.92	1.22	0
61	2	36.61	112	135	69	96	23.5	310	10.5	142	3.9	143	25	0.9	308.673	7.31	4	10	2	42	29	14	4	1	0	0	0	1	0	0	0	0	0	0	0	0	0	3399.26	23.88	2.4	0
69	1	36.78	92	134	63	93	9.2	273	8.6	140	4	275	15	0.7	308.635	7.41	1.92946	20	0	32	30	15	10	1	0	0	0	0	0	0	0	0	1	1	0	0	1	2527.42	7.72	1.31	0
73	2	37.22	83	194	65	96	10.3	146	12.8	134	4.6	212	55	1.8	308.621	7.44	0.9	20	4	45	37	13	7	0	1	0	0	0	0	0	0	1	0	0	0	0	0	4488.48	4.8	1.52	0
41	1	38.61	121	93	51	84	29.4	77	8.7	136	5.5	189	42	1.8	308.5	7.26	1.1	11	10	105	60	9	8	1	0	1	1	0	0	1	0	0	1	2	0	0	1	853.71	35.08	2.9	1
66	1	36.94	87	99	85	98	11.7	247	10.2	138	4.7	267	23	1	308.448	7.33	1.7	24	3	44	33	11	4	0	1	1	1	0	0	0	0	0	0	0	0	0	0	2878.55	3.4	1.92	0
22	1	36.61	103	124	87	100	6.5	243	10.5	141	3.7	304	6	0.7	308.432	7.34	3.5	19	0	26	14	15	1	0	1	0	0	0	0	0	0	0	0	0	0	0	0	3354.97	2.26	2.23	0
64	1	37.11	100	83	65	97	11.9	145	12.7	138	4.1	319	18	1.4	308.351	7.28	3.4	18	9	48	37	15	7	1	0	1	0	1	0	1	0	0	1	2	0	1	1	2766.9	9.84	7.92	1
63	2	36.72	109	147	63	98	10.1	313	11.6	135	4.6	351	27	0.9	308.343	7.26	1.8	24	3	39	28	13	6	0	1	0	1	0	0	0	0	0	0	0	0	0	0	6231.24	4.75	2.8	0
25	1	37.39	141	153	16	100	39.6	348	12.2	144	3.9	116	17	1.2	308.316	7.36	10.5	26	3	70	24	14	0	0	1	0	0	0	0	0	0	0	0	0	0	0	1	5942.48	4.9	2.58	0
62	2	37.39	68	100	57	98	13.7	251	9.4	133	4.7	95	77	4.2	308.178	7.38	0.8	10	6	47	34	14	6	1	0	1	0	0	0	0	0	1	0	0	0	0	1	5166.74	10.17	1.48	0
43	2	36.72	85	132	64	96	10.9	327	11.2	140	4	195	26	1.2	308.119	7.33656	1.2	14	5	36	18	14	2	0	1	1	1	0	0	0	0	0	0	0	0	0	1	4354.92	1.54	1.5	0
35	1	37	121	143	76	98	10.2	273	12.5	144	4.4	133	11	0.7	308.117	7.36	1.5	17	2	38	13	14	1	0	1	0	0	0	0	0	0	0	1	2	0	0	0	4540.38	5.9	1.16	0
68	2	37.22	74	150	115	100	12.1	212	9.9	136	4.2	363	21	1	308.067	7.37	3.3	22	1	41	29	15	5	1	0	0	1	0	0	0	0	0	1	2	0	0	1	3554.3	14.38	3.33	0
26	1	37.22	115	97	45	100	13.7	252	10.4	140	4.2	269	13	0.7	307.987	7.34	1.2	12	2	42	18	14	1	0	1	0	0	0	0	0	0	0	0	0	0	0	0	1961.86	28.15	1.2	0
44	1	37	100	124	80	99	24.4	305	9.5	136	3.8	342	26	1.4	307.886	7.39	2	20	3	46	22	14	2	1	0	1	1	0	0	0	0	0	1	2	0	0	1	8517.3	23.87	1.31	1
66	1	37.28	83	102	53	97	12.3	280	8.5	139	3	114	49	1.8	307.833	7.37033	2.8	14	4	43	29	15	8	1	0	1	0	1	0	0	0	1	1	1	0	0	1	-1796.85	9.87	3.03	1
40	2	36.94	103	147	83	99	8.4	164	12.4	139	4.9	225	21	1.5	307.8	7.33	1.1	25	1	38	22	15	0	0	1	0	0	0	0	0	0	0	1	2	0	0	0	8377.93	3.06	2.11	0
67	2	36.72	110	149	67	100	14.3	295	8	140	4.5	274	10	0.8	307.794	7.27	1.3	19	3	33	28	14	6	0	1	0	0	0	0	0	0	1	1	2	0	0	0	-155.86	8.72	2.51	0
64	2	37.06	104	126	72	97	13.9	242	10.6	144	3.4	176	9	0.7	307.792	7.43	1.2	15	0	24	24	15	5	1	0	0	0	0	0	0	0	0	1	2	0	0	0	2093.76	22.26	1.05	0
43	1	37.17	111	126	90	100	8.3	198	10	144	5.6	134	3	0.6	307.716	7.28	3	9	3	26	24	15	0	0	1	0	0	0	0	0	0	0	0	0	0	1	1	3835.63	4.97	2.99	0
55	1	36.72	95	120	45	93	18.8	226	11.3	134	4.8	342	31	1.1	307.671	7.34857	1.39215	21	1	44	30	15	3	0	1	0	1	0	0	0	0	0	1	1	0	0	1	3292.93	1.05	1.03	0
37	2	36.78	126	88	68	94	2.8	265	11.2	136	3.6	255	40	4.1	307.652	7.28	3.8	20	10	91	38	15	2	0	1	1	1	0	0	0	0	0	1	1	0	1	1	7715.47	27.11	4.1	0
63	2	36.83	88	150	66	97	12.3	224	13.2	141	4.3	159	23	1.4	307.648	7.23	1.3	20	1	27	25	15	3	1	0	0	1	0	0	0	0	0	1	1	0	0	0	5178.97	2.81	2.26	0
68	1	36.89	104	157	95	100	21	292	10.1	142	3.8	159	20	1.3	307.576	7.44	2.5	20	2	53	30	15	5	0	1	1	0	0	0	0	0	0	1	1	0	0	1	5257.26	15.54	2.47	0
53	1	37.06	102	171	72	98	8.2	341	9.5	137	4.2	99	55	3.8	307.543	7.31	2	14	4	43	29	14	6	0	1	0	0	0	0	0	0	1	1	1	0	0	0	857.97	3.28	1.32	0
71	1	38.17	119	247	80	97	12.742	248.028	11.6023	137	4.3	288	25	1.2	307.529	7.4	2	23	5	62	40	7	6	0	1	1	1	0	0	0	0	0	1	2	0	1	1	8782.87	7.13	3.59	1
71	1	36.78	71	117	59	99	6.3	191	10.3	138	3.7	344	14	1.1	307.511	7.43	5.9	24	2	40	29	15	4	1	0	0	1	0	0	0	0	0	1	1	0	0	0	4883.22	5.15	2.14	0
21	2	37	105	142	69	100	15.9	245	10.7	143	3.1	198	12	0.5	307.486	6.98	2.8	23	1	27	14	14	1	0	1	0	0	0	0	0	0	0	1	1	0	0	0	5767.62	2.51	1.57	0
33	2	37.06	68	111	77	99	14.4	211	15.1	138	4.2	260	24	1.7	307.416	7.49	1.6	13	3	32	13	15	1	0	1	1	0	0	0	0	0	0	1	1	0	1	0	2518.87	7.9	8.9	0
56	2	37.89	115	122	70	98	8.9	223	14.8	140	3.8	292	10	1.6	307.394	7.32	2.6	18	5	28	19	15	3	1	0	1	0	0	0	0	0	0	1	2	0	1	0	461.5	28.85	4.65	0
52	2	36.78	117	130	76	96	22.7	239	14.4	138	4.5	133	42	1.7	307.389	7.49	2.5	23	3	48	31	15	3	0	0	1	1	1	1	0	0	0	1	2	0	1	0	-566.54	50.92	39.01	1
75	2	37.22	153	85	63	96	13.9803	253.498	10.7071	138	4.4	174	36	0.9	307.324	7.41	2.4	16	5	50	40	15	7	0	0	1	0	1	0	0	0	0	1	2	0	0	0	3304.62	20.7	9.61	1
79	1	37.11	104	109	66	94	13.3	248	6.8	140	4	232	18	0.9	307.317	7.4	4	15	3	48	40	11	6	1	0	1	0	1	0	0	0	0	1	3	0	0	1	45	70.62	4	0
45	2	36.89	92	124	64	100	6.9	107	12.7	140	4.8	216	16	0.9	307.314	7.28	1.7	21	2	46	21	15	3	0	1	0	0	0	0	0	0	0	0	0	0	0	1	6231.94	5.18	1.1	0
66	1	37	104	148	60	100	10.6	302	14.2	139	5.6	236	14	1.1	307.311	7.04	2	38	0	27	26	15	4	0	0	0	0	0	0	0	0	0	1	2	0	0	1	6021.76	2.32	2.41	0
76	1	37.83	114	142	65	99	10.5	199	10.4	142	3.8	160	19	0.7	307.275	7.38537	1.5	11	4	67	33	12	7	0	1	0	1	0	0	0	0	0	1	1	0	0	1	3307	2.67	1.04	1
44	2	36.5	84	101	66	98	9.3	207	14.2	138	4	335	13	0.8	307.254	7.36	1.4	13	1	28	20	15	3	1	0	0	0	1	0	0	0	0	0	0	0	0	1	-923.91	6.78	1.02	0
66	1	35.67	112	123	69	100	11.6	417	12	132	5.7	367	32	1.5	307.217	7.14	3.1	10	3	70	49	15	7	1	0	1	0	0	0	0	0	1	1	3	0	1	0	8054.1	45.56	7.82	1
31	1	36.5	120	99	59	100	8	255	11.9	144	3.2	166	10	0.7	307.194	7.25497	2.5519	23	1	34	24	15	1	0	1	0	0	0	0	0	0	0	0	0	0	0	0	3438.81	3.28	1.82	0
64	1	37.28	70	166	68	100	10	163	11.9	142	2.9	229	13	0.7	307.165	7.53	1.2	11	9	67	61	3	5	1	0	1	1	1	0	0	0	0	1	2	0	0	0	-546	10.68	2.75	0
38	1	36.56	112	113	51	94	6.2	156	10.9	133	4.2	281	48	2.9	307.154	7.19	1.1	16	8	63	24	15	3	1	0	1	0	1	0	1	0	0	1	2	0	0	1	5573.68	7.33	5.27	0
63	2	39.28	111	161	84	99	15.1	197	10.2	144	4.1	113	13	1.3	307.121	7.29	3.4	16	5	41	23	15	7	1	0	1	1	1	0	0	0	1	1	2	0	1	0	3047.22	12.88	5.99	0
41	1	36.17	114	104	39	100	21.5	250	9.2	142	3.8	150	20	1.3	307.076	7.41	4.5	16	11	73	41	15	4	0	1	1	0	1	0	0	0	0	1	3	1	1	1	4463.77	42.9	43.12	1
58	1	37.06	108	144	67	98	11.7	144	10.2	140	4.4	277	8	0.5	307.046	7.33	1.1	11	4	42	26	15	4	1	0	0	0	0	0	0	1	0	1	2	0	0	0	3066.49	10.19	2.48	0
64	2	37.56	118	127	62	98	7	138	11.4	134	4	340	34	1.5	307.032	7.34	4.2	24	7	61	34	10	5	0	1	1	1	0	0	0	0	0	1	1	0	0	0	4462.22	4.97	1.77	0
32	1	36.61	85	144	94	97	6.6	199	9.8	133	5.9	134	61	6.1	307.03	7.30046	1.66644	16	5	47	27	15	4	0	1	0	0	0	0	0	0	0	1	1	0	0	0	3463.99	2.08	1.17	1
60	2	36.39	82	103	58	100	25	214	10.9	136	4.5	294	27	1.5	306.976	7.29	3.4	15	4	60	43	15	3	1	0	1	0	0	0	0	0	0	1	3	0	1	0	11999.6	31.02	8.07	1
59	1	37.11	78	146	76	96	8.6	251	12.8	138	4.3	318	13	0.6	306.91	7.35	1.24197	17	0	19	15	15	2	0	0	0	1	0	0	0	0	0	1	1	0	0	0	-1858.64	5.18	1.81	0
65	2	36.61	92	169	84	95	5.8	249	13.8	136	4.1	223	40	1.6	306.875	7.4	1.91046	16	2	46	29	13	3	1	0	0	1	0	0	0	0	0	0	0	0	0	1	3641.59	1.88	1.88	1
39	1	36.39	116	130	68	99	10.5	204	7.5	139	4.4	243	18	1.2	306.729	7.31	2.20293	24	3	44	23	15	3	0	1	0	1	0	0	0	0	0	0	0	0	0	1	3786.82	4.85	1.06	0
35	2	36.78	87	122	66	97	10.2	225	13.2	138	4.9	272	16	0.9	306.625	7.16	1.6	28	1	31	18	15	0	0	1	0	0	0	0	0	0	0	0	0	0	0	0	4828.7	3.36	1.5	0
36	1	37.11	117	174	90	100	21.1	354	9.2	139	3.6	127	40	5.2	306.541	7.32475	2.06845	21	4	51	24	15	6	1	0	0	0	0	0	0	0	1	1	2	0	0	0	1441.57	3.02	1.81	0
55	2	36.44	82	138	87	100	8.5	241	11.8	129	5.2	442	38	1.7	306.527	7.41	1.81537	16	2	39	24	15	3	1	0	0	1	0	0	0	0	0	0	0	0	0	1	3472.87	3.91	1.86	0
36	2	35.33	102	138	67	98	10.3	303	13.3	138	4.1	286	18	1	306.517	7.45	3	15	0	30	6	15	1	1	0	0	1	0	0	0	0	0	0	0	0	0	1	4525.71	2.1	2.06	0
33	1	36.61	119	139	58	98	12	205	10.6	133	4.8	401	24	1.1	306.449	7.11	2.7	31	1	53	19	15	0	0	1	0	0	0	0	0	0	0	0	0	0	0	0	5497.66	5.27	2.43	0
54	1	37.28	110	123	57	98	11.6	332	10.9	141	4.5	200	12	0.8	306.397	7.35	1.6	14	0	33	19	15	1	0	1	0	1	0	0	0	0	0	1	2	0	0	1	2588.74	3.43	1.51	0
48	1	36.5	103	123	79	100	3.2	103	6.9	121	3.6	888	22	0.8	306.39	7.22	0.9	11	8	69	52	10	6	0	0	1	0	0	0	0	0	0	1	2	0	1	0	6322.72	19.98	3.19	1
53	1	37.22	93	110	67	94	8.4	221	12	140	3.7	219	19	0.8	306.352	7.35	0.8	15	2	36	27	14	4	0	1	1	1	0	0	1	0	0	1	2	0	0	0	1658.49	13.59	7.65	0
56	1	37.06	91	172	55	100	10.4	215	12.1	137	4.6	229	29	1.1	306.279	7.28	1.2	23	2	45	26	15	3	0	1	0	1	0	0	1	0	0	1	2	0	0	0	4886.16	4.85	4.78	1
50	2	37.28	100	146	91	97	23.4	218	15.9	139	4.8	258	12	1.1	306.219	7.30986	2.00738	17	0	17	19	15	2	1	0	0	0	0	0	0	0	0	1	1	0	0	0	8628.23	7.66	1.52	0
29	2	37.17	93	133	74	100	6.1	166	12.3	144	4	125	9	0.9	306.159	7.26	1.5	24	1	14	12	15	0	0	1	0	0	0	0	0	0	0	0	0	0	0	0	3332.1	4.83	2.26	0
33	1	37.44	88	142	93	97	17	311	15	138	6.6	234	11	0.9	306.129	7.29	1.49769	18	1	26	12	14	2	0	1	0	0	0	0	0	0	0	1	2	0	0	0	3995.06	4.67	2.91	0
55	2	35.78	60	125	70	100	25.2	418	12.9	134	3.7	334	34	1.5	306.098	7.3	1.9	16	5	57	36	15	8	1	0	1	0	0	0	0	0	1	1	2	0	1	1	5529.67	9.54	3.52	1
56	1	36.11	93	115	54	99	11.2026	247.683	10.6898	140	4.1	212	17	0.6	306.049	7.36434	1.39329	15	1	34	23	15	3	0	1	0	1	0	0	0	0	0	0	0	0	0	0	1664.6	1.95	1.16	0
77	2	36.11	124	142	125	97	24.7	173	8.1	136	3.8	373	16	1	306.037	7.32	4.5	12	2	39	34	15	4	1	0	1	0	0	0	0	0	0	1	2	0	0	0	1923.37	6.78	2.03	0
68	1	37.33	114	119	99	94	22	390	8.8	133	4.5	320	37	1.4	305.992	7.31	4.5	17	4	71	42	13	2	0	1	1	1	0	0	1	0	0	1	2	0	0	1	3729.48	10.09	1.61	0
42	2	36.61	96	106	70	98	6	232	11.6	137	3.4	177	43	1.9	305.99	7.48	1.26305	17	4	49	19	14	1	0	1	0	0	0	0	0	0	0	0	0	0	0	0	4622.41	4.14	1.24	0
58	2	35.67	83	125	51	97	4.2	186	10.3	134	4.1	208	51	6.6	305.97	7.33401	1.60118	18	5	53	24	15	5	0	1	0	0	1	0	0	0	0	1	1	0	0	0	3247.19	1.3	1.31	1
38	2	37.33	108	118	43	94	16.1	321	12	133	3.9	418	25	1.3	305.951	7.35	2.1	23	4	63	19	14	1	0	1	0	0	0	0	0	0	0	0	0	0	0	0	7765.24	1.64	1.74	0
37	1	37.28	124	144	77	98	15.1	378	13.1	139	6	189	15	0.9	305.857	7.35	1.3	20	0	28	18	15	0	0	1	0	1	0	0	0	0	0	0	0	0	0	1	3233.46	3.77	2.81	0
64	1	36.83	106	121	81	96	11.2	327	11.1	134	4.4	220	47	1.1	305.808	7.3362	1.6894	21	2	49	36	15	10	0	1	0	1	0	0	0	0	0	0	0	0	0	1	952.64	3.89	1.7	1
55	2	36.56	105	152	87	96	4.1	83	7.5	138	5.4	226	18	1.5	305.784	7.26	5.7	9	3	42	23	15	6	0	0	0	0	0	0	0	0	1	0	0	0	0	1	1235	3.54	1.11	0
61	2	37	96	118	56	98	16.7	287	8.9	135	3.7	318	30	1	305.781	7.39	2.6	19	2	52	34	15	3	0	1	0	1	0	0	0	0	0	0	0	0	0	0	1676.89	5.58	1.46	0
21	1	36.11	98	120	74	97	12.5383	230.357	11.6179	142	4.2	144	15	0.6	305.757	7.37	2.9	15	2	49	14	14	1	0	1	1	0	0	0	0	0	0	0	0	0	0	1	2992.67	1.34	1.32	0
57	2	38.11	106	118	67	88	10.8	272	15.6	129	4.8	468	34	2.4	305.743	7.2	2.4	14	10	51	42	15	7	1	0	1	0	0	1	0	0	1	1	3	0	1	1	2974.97	46.88	1.29	0
25	1	37.17	144	126	68	100	13.4	245	11	137	5.4	306	11	0.8	305.729	7.19	2.5	34	0	34	18	15	2	0	1	0	1	0	0	0	0	0	0	0	0	0	1	4378.46	9.06	1.93	0
79	2	36.61	79	102	56	94	14.5	216	11.8	139	3.9	46	48	1.7	305.498	7.36	2.6	13	6	49	41	13	6	0	1	1	1	1	0	0	0	0	1	1	0	0	1	11358.8	12.95	2.8	0
66	2	35.61	85	95	55	100	19.1	357	11.2	126	4.8	262	82	9.4	305.441	7.15	2.4	24	10	65	50	11	8	0	1	1	0	1	0	0	0	0	1	1	0	0	1	2598.93	1.87	1.39	1
48	2	36.11	77	109	57	100	14	200	11.1	143	4	77	20	0.8	305.421	7.43	1.4	11	2	32	18	13	1	0	1	1	1	0	0	0	0	0	1	1	0	1	0	4811.93	6.52	1.59	1
70	2	37.89	94	161	93	100	11.5	160	13.9	125	4.8	612	33	2	305.386	7.31	4.8	19	6	66	45	11	7	0	0	1	0	0	0	0	0	0	0	0	0	0	0	4390.93	5.94	1.84	0
30	2	36.89	87	112	67	100	7.5	300	9.4	132	4.2	304	45	6.1	305.36	7.27306	0.6	18	5	59	28	15	4	0	1	1	0	0	0	0	0	0	1	1	0	0	1	2252.22	4.15	1.22	0
36	2	36.89	100	164	76	99	7.4	104	8.5	142	3.2	179	14	0.7	305.344	7.30246	1.47971	11	3	23	15	15	1	1	0	1	1	0	0	0	0	0	0	0	0	0	1	-1214.68	3.02	1.21	0
61	2	36.56	94	146	77	99	7.9	123	9.5	137	4	163	40	6.4	305.341	7.33	1.7	19	9	39	42	15	11	1	0	1	0	1	0	0	0	1	1	3	0	1	1	1988.62	10.75	10.03	1
55	2	36.39	68	161	97	98	25.2	66	12.5	126	5.9	406	53	1.7	305.284	7.3	2.9	14	10	70	41	14	7	1	0	1	0	1	0	0	0	1	1	2	0	1	1	872.6	77.48	10.79	0
54	2	37.28	90	106	60	100	20.2	321	9.3	129	5.7	453	30	1.8	305.281	7.34	1.9	15	5	62	34	15	3	1	0	1	0	0	0	0	0	0	1	3	0	0	1	14999.1	24.35	2.3	0
65	2	36.89	99	174	114	97	6.2	203	10	138	4.1	148	36	1.9	305.279	7.35	1.91351	15	3	42	27	14	6	0	1	0	0	0	0	0	0	1	1	2	0	0	1	2607.44	2.66	2.48	1
66	2	36.94	90	129	83	97	7.5	222	8.3	135	7.6	207	24	1.2	305.271	7.29	1.91592	23	4	45	32	11	4	1	0	0	1	0	0	0	0	0	1	1	0	0	0	3032.4	10.1	2.15	0
23	2	37	130	116	63	94	7.4	154	13.9	134	8.8	251	16	1	305.259	7.18581	2.63338	33	3	46	18	14	1	0	1	0	0	0	0	0	0	0	0	0	0	0	1	7353.22	2.26	1.57	0
49	2	37.39	128	104	53	88	22.9	270	14.9	141	4.5	70	29	2	305.246	7.13	2.3	19	11	73	50	15	4	1	0	1	0	0	0	0	0	1	1	3	0	1	1	5418.55	13.67	6.88	0
29	1	37.22	114	156	116	100	8.7	274	9.4	136	4.3	308	21	1	305.211	7.32	1.8	26	1	46	11	15	2	1	0	0	1	0	0	0	0	0	1	2	0	0	1	434	3.22	2	0
24	2	36	107	154	74	97	6.9	300	14	135	4.2	386	15	1.1	305.202	7.36	2.07991	16	2	53	8	15	1	0	1	0	1	0	0	0	0	0	0	0	0	0	1	4472.45	5.99	1.13	0
32	2	36.89	98	127	71	100	6.8	174	11	137	4.9	256	20	1	305.165	7.2	1.91745	24	2	39	16	15	2	0	1	0	0	0	0	0	0	0	0	0	0	0	1	3119.49	1.88	1.29	1
44	2	36.94	104	157	100	100	12.5	199	14.6	129	5.2	372	45	1.7	305.138	7.54	2.13793	17	2	42	32	15	2	0	0	1	0	0	0	0	0	1	0	0	0	0	1	4324.21	5.26	1.88	0
51	2	37	108	145	74	92	10.3	226	13.4	141	3.9	93	28	1.5	304.967	7.35938	2.1417	13	2	41	19	15	4	0	1	0	0	0	0	0	0	1	0	0	0	0	0	3739.84	1.13	1.18	0
21	1	36.56	141	156	77	100	14.7	400	11	143	3	188	7	0.7	304.944	6.9	1.7	15	3	69	25	11	2	0	1	0	0	0	0	0	0	0	0	0	0	0	0	6978.12	4.1	2.08	0
38	2	37.17	108	146	126	98	27.5	393	15.3	130	4.9	432	31	1.4	304.871	7.08	2.2	31	2	43	30	14	4	0	1	0	1	0	0	0	0	0	0	0	0	0	0	4982.38	4.55	1.63	0
77	2	36.83	68	221	66	99	9.1	235	13.1	137	4.5	104	45	2.2	304.849	7.39	1	22	4	62	37	14	9	1	0	0	0	0	0	1	0	1	0	0	0	0	1	3073.18	8.92	1.97	0
75	1	36.94	94	124	54	96	13.1	248	12.7	128	3.6	524	35	2.3	304.811	7.48	4	19	9	69	54	14	8	1	0	1	0	1	0	0	0	1	1	2	0	0	1	8623.35	8.15	4.22	1
22	1	37.11	133	124	81	100	10.2	412	11.3	141	4.4	181	11	0.8	304.784	7.22	4.2	28	1	43	15	15	1	0	1	0	0	0	0	0	0	0	0	0	0	0	0	6937.73	3.28	2.06	0
34	2	38.17	137	87	45	92	33.9	216	8.3	129	4.2	305	60	3.8	304.773	7.2	7.1	21	13	107	60	15	0	0	0	1	0	0	0	0	0	0	1	3	1	1	1	6805.56	15.01	9.11	0
67	1	36.5	0	107	83	100	18.6	303	9.5	141	4.6	140	16	0.7	304.692	7.31	5.6	16	6	59	51	15	11	1	0	1	0	1	0	0	0	0	1	1	0	0	0	4834.13	7.14	6.18	1
44	2	36.89	107	134	80	100	8.7	171	14.6	138	3.3	274	19	1	304.608	7.36	1.8	16	1	35	40	15	7	0	0	0	1	0	0	0	0	0	0	0	0	0	1	2322.33	6.12	1.4	0
57	1	36.94	103	144	71	96	12.9	398	10.2	139	4.1	272	9	0.6	304.525	7.33	1.93479	17	0	31	16	15	4	1	0	0	0	0	0	0	0	0	1	1	0	0	0	4157.02	7.26	1.39	0
24	1	36.94	117	96	52	100	22.1	294	10.2	137	4.4	280	17	0.7	304.427	7.31	1.3	17	1	47	27	15	1	0	1	0	0	0	0	0	0	0	0	0	0	0	1	2001.91	3	1.06	0
66	1	36.44	79	123	66	97	11.3	230	9.8	135	4.1	324	23	0.9	304.414	7.32	1.6	12	1	50	30	15	5	1	0	0	1	1	0	0	0	0	0	0	0	0	1	4954.44	14.62	1.05	1
73	1	36.33	55	148	68	100	5.5	182	11.5	142	4.3	129	13	0.7	304.41	7.36	2.2	15	3	35	41	10	6	1	0	1	1	0	0	0	0	0	1	3	0	1	0	-196.48	28.66	28.6	1
48	1	37.17	96	161	78	100	12.4	230	10.7	142	3.8	145	13	0.9	304.298	7.32	3	16	4	33	23	15	1	0	1	0	1	0	0	0	0	0	0	0	0	0	1	4123.76	2.22	2.15	0
76	2	36.5	64	63	49	100	4.7	272	8.5	128	5.5	382	45	1.5	304.294	7.33	0.6	9	2	48	51	15	10	1	0	1	0	1	1	0	0	1	0	0	0	0	0	3340.83	13.13	1.14	0
35	2	38.11	94	101	68	91	17.9	227	9.7	141	3.9	203	9	0.2	304.292	7.29	1.4	12	8	41	31	15	0	0	1	1	0	0	0	0	0	0	1	2	0	1	1	8436.82	18.76	9.74	0
61	1	37.44	72	138	72	99	13.6	197	11.9	139	3.5	180	26	1.1	304.286	7.35	1.7	16	3	36	25	14	7	0	1	0	0	1	1	0	0	0	1	2	0	0	0	3453.09	9.8	2.93	0
57	2	37	86	132	84	98	2.8	197	9.5	139	4.2	231	14	1.2	304.233	7.34	2.4	17	2	37	40	15	10	1	0	1	0	1	0	0	1	0	1	1	0	0	0	5237.32	4.01	1.23	0
47	1	36.33	115	140	76	100	14	191	12.3	136	4.1	297	21	1	304.2	7.04	2.1	32	1	42	18	15	3	0	1	0	1	0	0	0	1	0	0	0	0	0	0	5020.85	5.25	1.37	0
38	1	36.78	94	159	80	94	13.8	240	6.3	130	3.8	445	33	1.4	304.108	7.34	1.75902	19	2	30	22	13	8	0	1	1	0	1	0	0	0	1	0	0	0	0	0	1342.51	3.71	1.67	1
47	2	37.17	124	149	78	95	7.8	314	10	140	3.9	229	10	0.9	304.094	7.35	2.6	24	2	28	30	13	2	1	0	0	1	0	0	0	0	0	0	0	0	0	1	4884.15	1.4	1.43	1
28	2	36.89	110	126	82	96	28.7	436	14.1	139	4.5	224	13	1	304.087	7.27	1.6	28	0	33	18	15	0	0	1	0	0	0	0	0	0	0	0	0	0	0	0	463.72	3.49	2.78	0
49	2	37.06	128	101	63	99	23.5	82	8.5	130	5.4	316	44	2.5	304.07	7.19	9.4	18	14	99	64	13	7	1	0	1	0	0	0	0	0	1	1	3	1	0	1	6883.17	39.56	12.52	1
70	1	36.89	103	109	63	96	11.9	289	10.6	140	4.4	159	18	0.7	304.062	7.22	0.8	19	1	19	38	15	4	1	0	0	1	0	0	0	0	0	0	0	0	0	1	2176.61	5.81	1.38	0
25	1	36.67	89	123	81	99	4.7	205	13.1	140	4.2	211	11	0.8	304.051	7.23	1.28115	17	1	33	16	15	0	0	1	0	0	0	0	0	0	0	0	0	0	0	1	3004.84	1.99	1.07	0
68	2	36.56	98	134	84	97	24.2	261	11.9	140	3.9	188	16	1.1	303.959	7.36	1.4	12	3	44	45	15	12	1	0	0	0	0	0	0	0	1	1	1	0	0	1	3572.45	6.04	1.38	1
69	2	36.44	79	124	111	95	6.5	179	14.2	139	3.7	231	16	0.9	303.948	7.35001	1.91444	9	2	24	20	15	7	0	0	0	0	1	0	0	1	0	1	2	0	0	1	2440.04	3.71	1.64	0
50	2	36.78	107	162	90	97	5.7	122	12.4	133	3	143	67	2.6	303.873	7.31	1.4	25	6	81	38	9	2	1	0	0	1	0	0	0	0	0	1	1	0	0	0	8636.19	11.02	4.1	0
25	2	37.06	90	156	90	98	8.6	187	12.6	132	3.6	498	14	0.8	303.867	7.35	1.3	15	0	35	11	15	1	0	0	0	0	0	0	0	0	0	0	0	0	0	1	3992.53	6.89	1.2	0
49	2	37.22	98	120	68	100	12.1	203	8.9	134	4.1	318	28	1.3	303.867	7.4	1.2	7	2	51	26	15	4	1	0	1	0	0	0	0	0	1	1	1	0	0	1	3997.87	18.97	2.09	0
66	1	38.67	91	149	122	64	8.8	509	9	138	4.2	131	34	1.5	303.821	7.4	0.8	22	2	51	41	15	11	1	0	1	0	1	0	0	0	0	1	2	0	0	0	2360.36	18.96	1.61	1
67	1	37.44	63	114	60	100	13.3	229	9.8	139	5.2	123	24	1.1	303.805	7.32	1.7	11	1	37	28	15	8	0	1	1	0	0	0	0	0	0	1	2	0	0	0	2442.12	17.81	1.56	0
62	2	37.72	89	125	64	100	4.4	195	8.7	142	3.6	98	20	1.1	303.787	7.37529	1.62684	13	3	45	31	14	4	0	1	0	1	1	0	0	0	0	1	1	0	0	1	-1957.92	6.42	1.65	0
58	1	36.89	75	141	72	97	8.6	329	10.3	141	3.6	211	8	0.7	303.779	7.26	2.1	24	0	23	20	15	1	0	1	0	0	0	0	0	0	0	1	1	0	0	0	4772.48	8.54	1.69	0
53	2	36.56	97	131	62	100	10.9	242	7.9	132	5	311	35	2.6	303.778	7.19	2.4	23	2	45	31	15	7	0	1	0	0	0	1	0	0	1	1	1	0	0	1	2915.84	5.68	1.71	1
62	1	36.72	70	121	63	99	3.9	88	9.6	137	4.1	144	38	1.6	303.771	7.4	0.8	15	5	47	34	15	5	1	0	0	0	0	0	0	0	1	1	1	0	0	1	4462.38	2.52	2.11	0
65	1	36.89	91	152	94	100	10.2	271	10.4	135	3.4	234	39	2.2	303.729	7.35	1.1	17	2	45	36	15	9	1	0	0	0	1	0	0	0	1	1	3	0	0	0	3034.51	5.87	2.98	0
56	2	37.06	108	163	86	99	16.5	393	12	139	4	195	19	1.2	303.619	7.31	0.9	24	2	52	34	13	11	1	0	1	1	0	0	0	0	0	1	1	0	1	0	4960.28	29.1	4.23	1
72	2	36.61	113	112	60	95	18.9	322	10.5	135	4.1	232	35	1.7	303.589	7.22	2	14	5	58	42	15	9	0	1	1	0	1	1	0	0	1	0	0	0	0	0	559.64	21.6	2.37	1
21	1	36.56	80	120	53	93	11	334	12.4	142	4.5	113	12	0.9	303.563	7.21	1.1	25	2	33	18	14	1	0	1	1	0	0	0	0	0	0	0	0	0	0	1	3445.31	4	3.91	0
67	2	36.67	83	169	96	100	11.1	186	14.2	137	4.1	108	43	2.1	303.557	7.35	1.4	12	2	38	29	15	8	1	0	0	0	0	0	0	0	1	1	1	0	0	1	3294.53	23.51	1.88	0
71	1	37.28	97	111	62	100	11.3	149	10.1	142	3.9	121	14	0.9	303.522	7.43	1.2	10	3	34	21	15	6	0	1	1	1	0	0	0	0	0	1	1	0	0	0	3683.97	6.92	1.62	0
38	2	36.78	91	140	92	100	3	168	9.9	139	3.4	240	15	0.7	303.49	7.31326	1.33749	13	1	26	6	15	3	1	0	0	1	0	0	0	0	0	1	1	0	0	1	-663.1	2.89	1.01	0
75	2	36.83	113	127	78	99	9.6	210	14.8	135	3.8	163	47	1.3	303.441	7.3	1.4	16	1	40	30	15	9	1	0	0	0	0	1	0	0	1	0	0	0	0	0	3785.15	12.25	1.04	0
42	2	36.83	89	139	55	97	10.9	204	13.6	129	6.4	431	24	1.5	303.316	7.24	2.03577	27	2	56	26	15	1	0	1	0	0	0	0	0	0	0	0	0	0	0	0	4670.46	1.64	1.58	0
67	2	36.94	89	172	75	99	11.4	180	11.8	132	4.7	300	37	1.1	303.281	7.26	2	21	2	37	27	15	6	1	0	0	1	1	0	0	0	0	0	0	0	0	0	6017.84	4.14	3.06	0
57	1	37.33	99	121	56	96	1	197	7.5	128	4.2	372	51	2.7	303.281	7.42	2.1	16	3	73	31	15	8	0	1	1	0	1	0	0	0	1	1	1	0	0	0	3596.88	4.87	3.01	1
27	1	36.78	115	123	70	100	6.1	267	10.4	140	4.5	141	18	1	303.262	7.22	2.99082	19	2	26	14	14	2	0	1	0	0	0	0	0	0	0	0	0	0	0	0	4078.67	3.43	1.58	0
40	2	37.67	112	143	85	94	8.8	212	12.7	137	4.8	251	16	1	303.259	7.34	1.2	15	3	48	14	15	1	1	0	1	0	0	0	0	0	0	1	3	1	1	0	4963.45	43.17	24.13	0
29	1	37.28	135	115	54	100	22.8	496	10.3	142	4.1	140	9	0.7	303.192	7.27	1.5	21	1	36	23	15	1	0	1	0	0	0	0	0	0	0	1	1	0	0	0	2668.87	4.7	1.07	0
49	1	36.67	93	95	52	100	9.1	143	10.1	140	3	270	6	0.7	303.143	7.21	1.4	16	2	29	23	15	1	0	0	0	0	0	0	0	0	0	0	0	0	0	0	2776.3	3.64	1.49	0
37	1	37.06	103	144	84	100	17.2	195	12.7	139	3.2	260	12	1	303.13	7.21	1.1	17	4	34	15	14	1	1	0	0	0	0	0	0	0	0	1	1	0	0	1	7537.61	3.96	1.92	0
29	1	36.67	102	126	64	97	16.2	281	11.4	137	3.7	319	11	1.1	303.051	7.24	10.7	22	3	32	23	15	0	0	1	0	0	0	0	0	0	0	0	0	0	0	1	-1134.21	1.64	1.69	0
23	1	37	93	118	56	100	12.9	212	12.3	136	4.2	292	18	1	303.051	7.31	1.2	14	2	29	13	15	4	0	1	0	0	0	0	0	0	1	0	0	0	0	1	151.4	1.84	1.8	0
41	1	37.11	97	157	97	100	6.5	243	11.7	144	3.6	109	5	0.9	303.041	7.19	1.4	30	0	15	18	15	1	0	0	0	1	0	0	0	0	0	1	1	0	0	0	4815.86	5.8	2.49	0
34	1	36.89	99	99	43	100	13.3	405	13.1	137	4.6	202	24	0.8	302.994	7.27	2.55722	23	1	34	16	15	1	0	1	0	0	0	0	0	0	0	0	0	0	0	0	1634.37	1.59	1.53	0
45	2	37	100	146	93	98	9.1	109	11.7	140	4.2	172	14	0.9	302.956	7.39	1.5	16	6	32	20	14	1	1	0	0	1	0	0	0	0	0	0	0	0	0	1	3272.09	2.53	2.05	0
53	1	37.61	101	116	76	99	9.6	288	10	141	3	204	10	0.7	302.905	7.41	0.7	14	5	25	30	15	4	1	0	1	1	0	0	1	0	0	1	1	0	0	0	1942.7	17.95	3.05	0
28	1	38.33	138	132	72	95	13.2	277	11.9	143	3.2	144	7	0.7	302.9	7.29	1.3	17	7	67	43	8	1	1	0	1	1	0	0	0	0	0	0	0	0	1	0	6454	6.69	2.64	0
54	2	37.06	113	140	97	93	15.7	205	11.6217	137	4.4	284	12	0.6	302.863	7.31	1.9	23	3	33	22	15	4	0	0	0	1	0	0	0	0	0	0	0	0	0	0	3866.55	9.66	3.78	0
77	2	36.44	98	104	63	99	15.3	131	10.4	133	4.3	263	38	1.4	302.783	7.37	1.4	17	5	60	56	15	12	1	0	0	0	0	0	0	0	0	0	0	0	0	1	3887.23	2.96	2.86	1
74	2	36.72	121	135	81	100	6.6	66	9.6	135	4.4	269	25	2.2	302.673	7.2	5	37	6	43	30	15	7	1	0	0	0	0	0	0	0	1	1	1	0	0	0	5585.16	6.94	2.88	0
75	1	36.61	75	129	48	96	12.2	241	13.6	137	4.6	254	15	0.8	302.668	7.16	1.4	17	2	18	28	14	5	1	0	0	1	0	0	0	0	0	1	1	0	0	1	2775.81	6.58	1.24	0
20	2	37.06	88	110	64	98	11.7	141	13.6	138	4.5	221	15	0.9	302.635	7.33	2.1	20	3	41	16	15	2	0	1	0	0	0	0	0	0	0	0	0	0	0	1	2118.42	3.1	1.09	0
31	2	36.94	112	131	67	97	7.6	190	13.8	137	4.4	312	7	0.8	302.633	7.25	0.9	15	1	24	11	15	0	0	1	0	0	0	0	0	0	0	0	0	0	0	1	3648.62	3.21	1.13	0
33	2	36.39	106	135	82	100	11.1301	221.914	12.8166	134	4.1	385	14	0.8	302.589	7.07	1.9	27	2	26	11	14	0	0	1	0	0	0	0	0	0	0	0	0	0	0	1	3054.81	3.73	1.94	0
34	1	36.72	94	144	94	100	9	277	10.1	140	4.3	155	15	0.7	302.568	7.27	1.7	12	1	29	18	15	4	0	1	0	0	0	0	0	0	1	0	0	0	0	1	3490.26	3.22	1.2	0
60	2	36.44	80	101	82	100	23.1	508	10.9	130	5.8	300	40	2	302.552	7.32	3.3	19	7	80	50	14	8	0	1	1	0	0	0	0	0	1	1	2	0	0	1	7288.87	2.64	2.24	1
35	2	36.78	122	154	73	98	9	201	13.7	139	4.1	230	10	0.9	302.549	7.32	1.818	24	2	46	20	14	1	0	1	0	0	0	0	0	0	0	0	0	0	0	0	8618.94	3.45	2.35	0
54	1	36.61	62	152	76	94	10.8	152	10.7	132	5	339	27	1	302.476	7.37	1.6	16	4	38	23	14	5	0	1	1	1	0	0	0	0	0	1	1	0	0	0	3556.41	41.74	2.72	0
56	2	36.67	81	106	58	98	10	182	10.9	137	4.4	232	19	0.9	302.475	7.4	1.3	16	2	30	20	14	6	0	1	0	0	0	1	0	0	1	1	1	0	0	0	2616.11	4.38	1.15	0
68	2	36.89	93	99	69	91	2.7	83	12.9	135	4	286	24	0.8	302.46	7.37	1.1	14	8	59	34	15	4	1	0	1	1	0	0	0	0	0	1	2	0	1	1	5212.68	22.1	14.03	0
21	1	36.72	114	139	81	99	20	386	12.8	138	4.3	257	10	0.8	302.449	7.16	1.9	21	1	23	14	15	0	0	1	0	0	0	0	0	0	0	0	0	0	0	0	3361.92	2.91	1.42	0
36	2	36.44	102	134	87	96	4.4	163	12.4	140	3.6	169	16	1.5	302.303	7.27	1.8	19	3	35	14	14	4	0	1	0	0	0	0	0	0	1	1	1	0	0	1	4210.49	3.36	1.74	0
29	1	37.56	128	110	60	100	4.3	133	9.7	141	2.6	233	6	0.8	302.287	7.27	2.3163	22	3	38	23	15	2	0	1	0	0	0	0	0	0	0	0	0	0	0	0	2228.16	2.73	2.7	0
65	1	37.61	97	114	78	97	12.2	237	10.3	137	4.3	251	16	1	302.259	7.44	1.6	14	1	22	23	15	4	0	1	0	0	0	0	0	0	0	1	1	0	0	1	1496.65	1.89	1.74	0
44	1	36.61	87	113	75	97	9.5	379	12.9	135	5.5	254	20	1	302.254	7.23	1.72255	23	1	28	26	15	1	1	0	0	0	0	0	0	0	0	1	1	0	0	0	4925.61	6.1	6.06	0
48	1	36.56	93	182	88	100	9.9	278	11.6	136	4.3	164	35	1.4	302.211	7.19	2.6	14	7	62	40	12	4	1	0	1	0	0	0	0	0	1	1	3	0	0	0	4904.79	34.69	8.8	0
47	2	36.89	128	151	99	100	15.5	244	14.4	137	4.5	275	11	1.2	302.206	7.14	1.5	28	2	35	27	15	2	0	1	0	0	0	0	0	0	0	0	0	0	0	1	4379.15	1.74	1.66	0
55	2	37.11	140	132	90	94	12.5	271	13.5	133	3.3	385	23	0.8	302.203	7.5	1.1	23	6	58	57	8	4	1	0	1	1	0	0	0	0	0	1	2	0	0	0	4402.65	11.53	6.5	1
47	2	36.94	104	141	68	100	6	120	10.2	141	4	135	13	0.9	302.143	7.31	1.3	14	6	36	20	15	0	0	1	0	1	0	0	0	0	0	0	0	0	1	1	3295.97	2.02	1.16	0
54	2	36.5	132	131	91	96	8.9	190	13.5	136	4.1	253	22	0.9	302.113	7.36	4.7	24	0	42	40	15	11	1	0	0	0	1	0	0	0	0	1	2	0	0	1	-2383.97	8.09	2.2	0
55	1	37.11	136	151	107	95	17.6	246	13.7	138	4	268	9	0.7	302.103	7.47	1.6	15	0	33	19	15	1	0	1	0	1	0	0	0	0	0	0	0	0	0	0	473.1	3.61	1.75	0
52	2	37	101	131	68	97	5.7	287	11.1	129	4.5	503	20	1.7	302.087	7.39	1.4	20	2	35	18	15	2	1	0	0	1	0	0	0	0	0	0	0	0	0	0	3911.76	7.04	1.26	0
54	1	37.06	98	110	58	100	6	344	8.5	140	3.2	160	19	0.9	302.075	7.41	1.7	13	2	29	18	14	3	0	1	1	0	0	0	0	0	0	0	0	0	1	0	1368.98	4.7	2	1
27	2	37.22	78	157	85	99	13.5	439	12.6	136	4.3	302	13	0.7	302.021	7.46	2.05497	14	0	20	11	15	0	0	1	0	0	0	0	0	0	0	0	0	0	0	0	-662.55	4.75	1.77	1
39	1	36.39	101	157	79	100	10.1	212	10.4	136	5	243	18	0.7	301.929	7.33	1.62166	21	1	31	19	15	2	0	1	0	1	0	0	0	0	0	0	0	0	0	1	4676.54	4.69	1.11	0
41	2	37	121	141	99	90	8.4	157	13.6	141	3.8	105	18	0.9	301.862	7.34042	1.61228	20	4	44	28	15	1	0	1	0	0	0	0	0	0	0	1	1	0	0	0	4666.09	5.72	3.94	1
23	1	37.11	91	128	82	100	7.9	265	12.8	139	4	221	10	0.8	301.849	7.33918	0.9	18	1	31	11	15	1	1	0	0	0	0	0	0	0	0	0	0	0	0	1	4238.16	4.02	2.35	0
38	2	38.22	93	108	68	96	5.9	199	7.5	142	3.6	140	8	0.5	301.835	7.38	0.8	10	0	21	9	15	2	0	1	0	0	0	0	0	0	0	0	0	0	0	0	115.94	2.49	2.46	1
34	2	37.39	126	138	96	94	10.6	395	11.4	133	4.9	391	12	0.9	301.808	7.31	1.3	21	2	43	15	15	1	1	0	1	0	0	0	0	0	0	1	1	0	0	1	3813.28	12.74	2.77	0
58	1	38.17	120	115	72	97	9.4	108	12	133	4.4	446	6	0.9	301.721	7.43	1.52505	12	2	32	22	15	5	1	0	0	0	1	0	0	0	0	1	1	0	0	1	-1721.15	3.65	1.53	0
29	2	36.78	82	181	122	100	13.2	374	14.9	133	5	366	15	1	301.69	7.24994	1.3	29	0	38	21	15	2	1	0	0	0	0	0	0	0	0	1	1	0	0	1	4488.67	4.48	2.77	0
57	2	35.67	80	152	75	100	10.5	117	8.4	131	4.9	133	63	3.6	301.689	7.30299	2.18329	11	8	57	26	14	10	1	0	0	0	0	0	0	0	1	0	0	0	0	1	1252.24	11.54	1.24	1
44	1	37.61	95	125	62	100	13.3	255	13.9	140	3.9	115	21	0.8	301.689	7.4	1.5	14	2	26	18	15	1	0	1	0	0	0	0	1	0	0	0	0	0	0	0	2997.61	4.23	1.09	0
32	1	37.28	132	115	74	100	25.3	134	11.8	135	4.2	348	11	0.7	301.662	7.15	1.5	21	3	53	25	14	1	0	0	1	1	0	0	0	0	0	1	3	0	0	0	6412.48	19.53	5.43	0
54	1	37.44	128	138	77	100	3.1	102	8.7	131	4.3	372	29	1.3	301.624	7.39	4.6	24	2	45	28	15	2	0	1	0	1	0	0	0	0	0	0	0	0	0	0	5158.46	3.14	1.24	0
76	1	36.39	137	89	60	97	29.9	420	8.2	128	4.4	122	84	3.1	301.578	7.31	2.7	14	5	86	65	13	9	1	0	1	0	1	0	0	0	1	1	3	0	0	0	1597.97	21.59	5.46	0
40	1	36.78	97	126	71	97	11.8	580	10.9	139	3.1	87	35	1.2	301.533	7.38797	2.09403	16	2	39	23	15	7	0	1	1	0	1	0	0	0	1	0	0	0	0	1	3613.82	6.13	2.32	1
71	2	36.28	102	153	85	96	6.9	250	10.7	138	3.8	91	36	1.4	301.513	7.39	1	16	4	31	35	15	5	1	0	1	0	1	0	0	0	0	0	0	0	0	1	1583.65	16.06	1.04	0
68	2	37.11	86	111	58	92	6.6	210	12.8	136	4.8	249	17	1.1	301.505	7.39	3.1	12	5	41	30	14	4	1	0	1	1	0	0	0	0	0	1	1	0	1	0	3289.66	39.9	26.11	0
62	1	36.94	83	113	60	97	14.9	147	12.7	135	3.9	310	18	0.8	301.451	7.39	1	16	2	36	26	15	5	1	0	1	0	0	0	0	0	0	0	0	0	0	1	1761.99	7.61	2.6	0
79	2	36.39	65	114	57	95	10.3	142	8.4	132	5.2	114	58	3.8	301.448	7.22	2.5	15	5	65	68	15	13	0	1	1	0	0	0	0	0	1	1	3	0	0	1	5248.17	14.91	2.82	1
36	2	36.72	83	144	84	99	4.4	142	12.5	139	4	187	14	1.1	301.389	7.35	1.1	16	2	26	14	15	1	1	0	0	0	0	0	0	0	0	0	0	0	0	0	-436.73	3.39	1.86	0
49	1	37.89	121	104	59	97	10.7	385	13.3	141	3.9	80	20	0.9	301.387	7.33	1.59871	17	3	60	32	10	5	0	1	1	0	0	0	0	0	0	0	0	0	0	0	2737.1	2.79	1.82	0
76	2	36.5	95	122	62	100	13.2	335	10.6	139	3.7	191	15	1.2	301.368	7.37481	2.4	23	4	47	38	15	8	1	0	1	0	0	0	0	0	1	1	3	0	0	1	8655.12	8.98	1.85	1
72	2	36.83	73	130	82	96	4.3	198	6.5	138	4.6	97	30	2	301.303	7.34	1.1	18	3	46	27	15	9	1	0	0	0	0	0	0	0	1	1	2	0	0	0	-435	15.81	3.05	0
62	2	37	90	115	68	96	24.3	273	13.9	139	3.8	196	13	0.5	301.132	7.45	1.43223	12	0	27	28	15	4	0	1	1	0	0	0	0	0	0	1	3	0	0	0	2637.46	20.64	4.69	0
59	1	36.89	75	104	70	100	15.4	149	10.9	133	4.4	234	37	6.6	301.014	7.38	3.7	20	7	54	34	13	7	0	1	1	0	0	0	0	0	1	1	1	0	0	1	4684.43	17.03	2.94	1
45	2	39.44	109	108	61	96	20.7	175	11.1	132	4.3	130	59	3.3	300.894	7.29	2.6	20	12	66	53	15	5	1	0	1	1	0	0	0	0	0	1	3	0	1	0	8937.28	50.87	15.95	1
42	2	37.28	102	137	68	99	15.3	230	12.6	132	5.1	319	25	1.3	300.851	7.38	1.2	24	2	29	19	15	2	0	1	0	1	0	0	0	0	0	0	0	0	0	0	4247.75	1.88	1.47	0
20	2	36.89	74	117	70	98	10.195	251	12.5606	137	4.7	243	11	0.9	300.829	7.38	0.9	19	1	22	11	15	0	0	1	0	0	0	0	0	0	0	0	0	0	0	1	-1656.1	1.07	1.11	0
75	2	36.11	84	121	55	100	7.6	142	6.9	138	4.3	97	30	2.3	300.703	7.4	1.5	8	5	50	41	14	12	1	0	1	0	1	1	0	0	1	1	1	0	1	0	5948.38	21.14	4.39	0
65	2	38	107	151	94	96	23.9	220	12.7	139	4.1	183	12	0.8	300.652	7.4	1.7	15	2	32	37	13	4	1	0	0	0	0	0	1	0	0	1	2	0	0	0	2568.3	4.55	1.53	0
57	2	36.06	121	122	97	97	16	452	13.6	135	4.5	229	25	1.6	300.651	7.35	2.2	19	2	46	28	15	3	1	0	0	0	0	0	0	0	0	1	1	0	0	1	6156.73	2.76	2.01	0
56	2	37.44	114	173	75	99	14.6	110	10.7	134	4.9	319	14	0.7	300.522	7.24	1.9	18	2	38	22	15	5	1	0	0	1	0	0	0	0	0	0	0	0	0	0	9298.8	5.39	2.15	0
27	1	37.5	96	129	100	99	16.9	211	11.7	139	4.1	187	11	0.7	300.517	7.4	1.3	14	2	26	14	14	0	0	1	0	0	0	0	0	0	0	1	1	0	0	0	3847.43	3.51	2.79	0
62	2	36.67	86	137	79	94	10.3	211	12.3	137	4.1	226	16	1.1	300.47	7.33	1.6	20	2	32	24	15	6	1	0	0	0	0	0	0	0	1	1	1	0	0	0	2231.66	5.02	2.14	0
59	2	37.06	79	135	76	97	8.8	235	11.1	142	2.7	122	12	0.5	300.463	7.39	0.8	12	1	32	25	14	6	1	0	0	0	1	0	0	1	0	1	1	0	0	1	2233.49	4.19	1.32	0
63	2	35.22	81	108	51	97	13.5	116	10.4	139	4.5	106	21	1.7	300.389	7.39	2.8	17	6	91	42	15	5	1	0	1	0	0	0	0	0	1	1	2	0	1	0	7066.4	19.02	8.88	0
66	2	36.61	93	130	80	100	8.1	185	11.3	144	3.6	47	7	0.6	300.311	7.43	2.3	15	2	30	28	13	3	1	0	0	0	0	0	0	0	0	0	0	0	0	0	2607.61	1.63	1.28	0
21	1	37.11	111	117	73	98	11.1	415	13.7	139	5.3	152	9	0.7	300.259	7.17	1.3	19	1	28	23	15	1	0	1	0	0	0	0	0	0	0	1	2	0	0	0	3396.59	1.73	1.66	0
48	1	36.67	114	132	76	100	18.4	595	9.4	137	5.6	110	25	1.2	300.24	7.38	2.3	18	1	40	21	15	2	1	0	0	1	0	0	0	0	0	1	3	0	0	0	3266.25	1.78	1.74	1
38	1	36.94	103	133	41	93	25.5	245	8.3	137	4.2	250	11	0.7	300.217	7.35	0.8	16	3	45	16	15	4	0	1	0	0	1	0	0	0	0	1	1	0	1	0	2898.7	6.96	4.92	0
40	2	37.44	125	144	93	96	19.4	375	11.5	134	4.9	274	20	1.3	300.165	7.39	1.8	16	5	55	24	15	6	0	1	0	0	1	0	0	0	0	1	2	0	1	0	5083.78	9.69	5.72	1
39	2	37	99	143	84	98	6.9	303	9.7	139	6.2	122	8	0.3	300.035	7.46	3.2	17	0	30	9	15	2	1	0	0	0	0	0	0	0	0	0	0	0	0	1	1953.15	8.81	1.18	0
38	2	36.39	100	116	69	100	18.9	235	12	134	5.2	278	17	1.4	299.916	7.23	1.8	30	3	48	19	14	0	0	1	0	0	0	0	0	0	0	0	0	0	0	1	4536.71	3.86	1.76	0
51	1	36.39	86	120	60	100	12.68	269.949	11.7747	137	3.9	229	15	1.2	299.879	7.38	1.59105	22	5	23	23	15	5	0	1	0	0	0	0	0	0	1	0	0	0	0	1	3360.49	1.9	1.93	0
56	1	36.72	101	110	60	100	20.9	271	8.8	133	3.9	373	15	1.2	299.879	7.32	3	12	5	27	41	15	12	1	0	1	0	0	0	0	0	1	0	0	0	0	1	2608.14	3.44	1.77	0
55	1	37.11	108	125	60	99	22.1	438	8.2	135	4.2	264	19	1	299.852	7.11	1.1	21	5	70	39	15	4	0	1	1	1	0	0	0	0	0	0	0	0	1	1	4118.66	9.26	2.27	0
34	2	36.39	66	138	83	100	4.9	157	11.1	136	3.6	287	13	1.1	299.787	7.23	1.9	24	0	20	21	15	0	0	1	0	0	0	0	0	0	0	0	0	0	0	1	4968.37	3.43	1.51	0
26	2	37.61	130	163	81	99	15.7	294	16	136	4.7	202	20	1.6	299.765	7.22	3.2	17	3	53	20	13	1	1	0	0	1	0	0	0	0	0	0	0	0	0	0	4552.83	5.19	2.2	0
35	1	36.78	94	123	93	98	17.5	473	14.6	137	3.6	308	4	0.4	299.74	7.47	3.8	18	1	29	11	15	1	0	1	0	0	0	0	0	0	0	1	2	0	0	0	3514.84	6.85	1.24	0
18	1	37.56	117	108	75	98	16	358	10.8	138	4.6	236	4	0.6	299.74	7.25362	3.29401	20	1	31	18	15	0	0	1	0	1	0	0	0	0	0	0	0	0	0	1	-347	8.16	2.95	0
33	2	38.33	115	162	73	100	24.9	182	7.2	125	2.7	257	84	7.8	299.678	7.36	2.09658	23	5	66	35	15	4	0	1	1	0	0	0	0	0	1	1	2	0	0	0	1983.33	5.46	5.42	0
33	2	36.61	109	130	79	99	12.9	287	10.8	136	5	163	24	1.5	299.627	7.3	3.18162	24	2	47	14	15	0	0	1	0	0	0	0	0	0	0	0	0	0	0	1	3595.07	4.68	1.01	0
32	2	37	110	112	63	98	8.4	229	12	135	4.4	244	20	1	299.498	7.29	2	22	3	40	21	15	0	0	1	0	0	0	0	0	0	0	0	0	0	0	0	4142.93	1.1	1.03	0
24	2	37.28	117	118	71	100	16.8	312	13.5	133	4.9	258	26	1.2	299.419	7.28	1.8	25	2	55	23	15	1	0	1	0	0	0	0	0	0	0	0	0	0	0	1	3861.33	4.22	2.15	0
73	2	36.5	112	117	93	98	9.5	216	14.9	136	4.4	155	28	1	299.411	7.35	1.99204	25	1	37	44	15	6	1	0	0	0	1	1	0	0	0	1	1	0	0	0	5868.81	6.58	1.36	0
21	1	36.94	120	124	71	100	17.6	203	7.1	137	4.8	187	15	0.9	299.346	7.2	1	22	2	61	26	15	0	0	1	0	0	0	0	0	0	0	0	0	0	0	0	-624.25	2.72	1.76	0
43	2	37.33	79	136	83	100	13.8	127	10.5	140	3.9	124	13	1.7	299.332	7.4	1.4	12	8	35	36	8	1	1	0	0	1	0	0	0	0	0	1	2	0	1	1	-715.97	3.56	1.31	0
21	1	36.67	136	135	74	100	17.8	202	11.7	134	5.2	305	11	0.8	299.273	7.07	3.7	28	2	52	23	15	0	0	1	0	0	0	0	0	0	0	1	2	0	0	1	6646.3	24.91	1.84	0
66	1	36.94	100	84	42	100	10.3	160	7.9	140	3.5	127	14	0.8	299.056	7.42	2.4	16	5	55	38	13	6	0	0	1	0	0	1	0	0	0	1	2	0	0	1	2414.18	9.93	3.81	0
20	2	37.22	92	112	56	99	10.5	253	12.3	138	3.5	244	7	1	299.056	7.33	0.7	16	2	26	24	14	0	0	1	0	0	0	0	0	0	0	0	0	0	0	1	7752.52	1.56	1.49	0
23	1	36.89	134	121	66	100	18.2	395	11.2	136	4.2	294	6	0.5	298.876	7.24	0.8	20	1	37	15	15	0	0	1	0	0	0	0	0	0	0	0	0	0	0	1	-364.57	1.78	1.68	0
24	1	36.72	105	113	55	100	24.7	311	13.4	132	5.9	325	14	0.9	298.856	7.08	1.8	29	1	55	24	15	2	0	1	0	0	0	0	0	0	0	0	0	0	0	0	5661.39	8.55	2.43	0
61	2	37	111	123	70	96	17.3	173	7.9	133	4.7	210	33	2.2	298.852	7.23	2.81475	12	5	60	38	14	6	1	0	1	1	0	0	0	0	1	1	2	0	0	0	4706.35	6.16	2.1	0
53	2	36.5	92	99	69	97	11.8	107	8.1	125	4.7	497	33	1.8	298.797	7.25	3.1	17	7	52	47	15	7	0	0	1	0	0	0	0	0	0	1	3	0	0	1	11222.7	11.02	3.06	1
28	1	37.11	129	160	93	100	9.8	279	13.7	139	3.9	118	18	0.8	298.784	7.36	1.6	14	1	52	21	15	2	0	1	0	0	0	0	0	0	0	0	0	0	0	0	5242.59	3.97	3.01	1
48	2	36.72	92	118	67	100	15.3	194	10.2	138	3.8	209	10	0.8	298.783	7.29	1.4	11	1	13	21	15	2	0	1	0	0	0	0	0	0	0	0	0	0	0	0	1994.93	2.73	1.77	0
28	2	36.89	87	147	74	100	10.9	250	14.9	136	4.1	289	7	1	298.756	7.27	1	23	0	25	15	15	0	0	1	0	0	0	0	0	0	0	0	0	0	0	0	1685.5	1.35	1.19	0
54	1	36.61	96	120	84	98	21.8	213	12.3	135	4.1	196	27	1.2	298.732	7.26	1.9	17	8	34	42	15	7	1	0	1	1	1	1	0	0	0	1	1	0	1	1	5458.2	19.55	4.44	0
32	1	37.06	136	158	67	100	5	242	11.7	138	4	207	9	0.8	298.714	7.4	1.51134	17	1	28	13	15	2	0	1	0	0	0	0	0	0	0	1	1	0	0	1	3192.96	1.48	1.45	0
26	1	36.78	117	139	82	98	8.1	236	13.3	138	3.5	224	9	0.8	298.659	7.22	0.7	22	0	24	16	15	1	0	1	0	0	0	0	0	0	0	1	1	0	0	1	1297.25	3.97	2.81	0
67	2	36.83	97	154	102	99	7.8	160	11.4	140	4	89	16	1.3	298.659	7.32	1.5	15	1	22	28	15	6	0	1	0	0	0	0	0	0	1	1	1	0	0	1	493.62	3.42	1.01	0
26	1	36.28	108	102	63	98	6.3	292	11.7	136	4.5	267	7	0.8	298.333	7.29	0.9	19	1	29	20	15	1	0	1	0	0	0	0	0	0	0	0	0	0	0	1	3877.11	1.9	1.16	0
61	1	37.11	96	139	55	100	7.7	333	10.8	134	3.9	219	29	1.1	298.324	7.39	1.8	25	3	35	29	14	4	0	0	0	1	0	0	0	0	0	1	2	0	0	0	4352.77	4.62	2.48	0
22	1	37	108	109	64	100	13.2	328	12.3	137	4.5	205	11	0.7	298.317	7.13	1.2	29	1	28	11	15	0	0	1	0	0	0	0	0	0	0	0	0	0	0	1	3665.27	1.8	1.18	0
56	2	37.17	95	99	78	94	13.9	41	9	136	4.5	196	18	1.1	298.317	7.35	4.8	14	7	38	22	14	5	1	0	1	0	0	0	0	0	0	1	2	0	0	0	3761.44	19.9	2.21	0
62	2	37	92	123	61	100	11.8	192	13	137	3.8	153	23	0.7	298.314	7.39	0.9	16	1	26	18	15	4	0	1	1	1	0	0	0	0	0	1	2	0	0	0	1564.65	23.2	2.22	0
53	2	37.06	91	136	86	97	7	168	12	133	3.8	303	22	0.8	298.29	7.44	1.8	11	1	36	20	15	2	1	0	0	1	0	0	0	0	0	0	0	0	0	1	2019.17	4.94	1.08	0
59	2	36.94	120	204	102	96	5.8	23	9.1	136	4.6	211	15	1	298.279	7.37	2.4	25	6	45	24	15	5	1	0	1	1	0	0	0	0	0	0	0	0	0	1	6274.25	6.78	1.03	1
27	2	36.67	104	125	73	99	11.5	360	13.2	135	4.6	234	17	1	298.271	7.33	5	30	2	37	13	15	4	0	1	0	0	0	0	0	0	0	0	0	0	0	1	4684.79	8.9	2.19	0
52	2	36.61	89	114	67	99	9	421	8	133	4	141	46	10.3	298.262	7.37	1.9	22	5	45	24	15	6	0	1	0	1	0	1	1	0	1	0	0	0	0	0	2965.47	3.13	1.03	1
35	2	36.94	77	128	81	100	2.7	212	12.3	137	3.8	242	9	0.6	298.259	7.21	1.3	20	1	22	18	15	1	0	1	0	0	0	0	0	0	0	1	1	0	0	1	3712.75	4.11	2.05	0
61	1	36.83	85	110	76	98	4.5	169	12.7	142	3.1	86	9	0.4	298.192	7.32	1.1	15	1	44	28	15	3	0	1	0	0	0	0	0	0	0	1	1	0	0	1	5765.15	4.04	2	0
66	1	36.5	100	161	138	99	11.7	359	11.1	136	3.5	236	17	1.1	298.183	7.31	4.8	19	5	50	40	8	7	1	0	1	0	1	0	0	0	0	0	0	0	0	1	3344.64	25.93	1.75	0
50	1	36.67	104	138	85	92	10	338	10.8	137	3.7	218	13	0.6	298.154	7.26	0.7	22	0	31	20	15	1	1	0	0	0	0	0	0	0	0	0	0	0	0	0	5352.74	8.75	1.91	0
37	2	36	115	138	91	100	14.9	335	14.8	134	3.6	310	16	1.2	298.137	7.42	0.6	20	2	40	17	15	2	1	0	0	1	0	0	0	0	0	1	1	0	0	1	4613.29	9.21	1.01	0
50	1	36.33	89	141	72	99	22.1	274	15	138	3.6	217	8	0.7	298.113	7.22	1.6	24	1	30	23	15	2	0	1	0	0	0	0	0	0	0	0	0	0	0	1	3532.55	2.68	1.8	0
67	1	36.56	81	110	45	100	17.7	222	9.3	138	3.6	159	17	0.6	298.105	7.35628	1.90473	14	2	34	26	14	4	1	0	1	0	1	0	0	0	0	0	0	0	0	0	498	3.71	2.71	0
41	1	36.56	82	146	110	100	10.6	268	12.2	140	3.3	168	6	1	298.076	7.32	2.4	10	5	59	33	6	3	1	0	0	0	0	0	0	0	0	1	2	0	0	0	3032.88	10.75	1.61	0
58	1	36.44	88	100	65	96	17.5	138	13.1	132	4.1	266	31	0.6	298.049	7.37	1.3	14	6	51	54	8	8	0	0	1	1	0	0	0	0	0	0	0	0	0	0	5765.25	9.02	1.15	1
66	1	36.39	107	96	43	92	9.2	113	7.6	140	3.2	67	22	0.7	297.979	7.38	1.9	12	2	70	50	15	10	1	0	1	1	1	0	0	0	0	1	2	0	0	1	2417.66	9.48	9.54	1
60	1	36.78	89	98	56	94	8.1	178	10.3	136	3.8	234	15	1.2	297.957	7.27	2.1	16	2	58	36	15	3	1	0	1	1	0	0	0	0	0	1	2	0	0	1	2836.5	4.29	2.1	0
77	2	38	101	122	59	100	3.3	91	10.2	132	3.7	163	49	0.9	297.956	7.46	2.9	13	4	58	41	15	4	1	0	1	1	0	0	0	0	0	0	0	0	1	0	9596	6.53	1.63	0
51	1	37.44	106	132	72	98	10.9	192	10.7	133	4.2	314	17	1	297.916	7.27	1.1	27	1	33	25	14	3	0	1	0	1	0	0	0	0	0	0	0	0	0	1	1179.51	3.52	2.08	0
58	1	36.67	104	122	67	100	9.6	251	12.1	140	3.9	137	7	0.5	297.911	7.34	0.8	12	0	32	21	15	2	1	0	0	0	0	0	0	0	0	0	0	0	0	1	1676.25	6.96	1.04	0
24	2	36.94	138	127	66	94	12.4	223	13.7	137	3.9	174	18	0.9	297.895	7.21921	2.61624	23	1	45	20	15	1	0	1	0	0	0	0	0	0	0	0	0	0	0	1	3464.22	1.39	1.34	0
33	1	37.11	77	160	88	100	12.6	262	13.6	138	4.1	188	9	0.6	297.859	7.28461	1.44334	18	1	18	11	15	1	0	1	0	0	0	0	0	0	0	1	1	0	0	1	76.52	2.75	1.87	0
25	1	37.17	77	113	51	100	8.1	346	11.1	138	3.6	225	6	0.8	297.843	7.32	1.1	18	1	21	11	15	1	0	1	0	0	0	0	0	0	0	0	0	0	0	1	2756.66	3.19	1.24	0
30	2	36.61	97	121	64	98	19.9	345	14.9	135	4.3	153	30	1.7	297.814	7.27681	3.3049	23	4	50	20	14	3	0	1	0	0	0	0	0	0	0	0	0	0	0	1	1934.32	8.91	1.04	0
55	2	37.06	124	100	60	100	36.4	156	10.3	131	4.3	205	44	2.5	297.703	7.16	5.5	16	10	66	43	15	9	1	0	1	0	0	0	0	1	1	0	0	0	1	1	7313.59	23.63	2.78	1
36	1	37.56	120	156	87	100	16.9	239	10.9	136	4.6	149	23	0.7	297.692	7.35	1.8	19	1	30	13	14	2	0	1	0	0	0	0	0	0	0	0	0	0	0	0	3941.69	6.69	1.58	0
66	1	36.89	88	136	88	95	8.8	150	10.6	137	3	195	19	1.5	297.619	7.39	1.8	13	4	30	18	15	8	0	1	0	0	1	0	0	0	1	1	3	0	0	0	2625.62	20.85	5.01	1
53	2	36.56	76	195	108	98	5.9	260	13.5	139	3.7	149	11	0.9	297.606	7.3708	2.02761	13	1	17	13	14	3	1	0	0	1	0	0	0	0	0	0	0	0	0	0	-15	6.46	6.43	0
23	1	36.39	131	137	100	99	6.7	140	13	140	3.8	147	5	0.6	297.552	6.97	1.8629	19	2	40	23	15	0	0	1	0	0	0	0	0	0	0	0	0	0	0	1	3834.94	6.2	1.93	0
56	2	36.78	98	109	49	91	7	207	9.6	137	4.2	157	18	1.1	297.551	7.39	1.44974	12	2	52	22	15	3	0	1	0	1	0	0	0	0	0	0	0	0	0	1	3379.23	3.61	1.07	1
23	1	36.72	88	134	52	100	9.6	321	13.8	138	3.7	216	6	0.7	297.543	7.17	1.3	23	0	19	11	15	0	0	1	0	0	0	0	0	0	0	0	0	0	0	1	2680.41	2.33	1.59	0
23	1	36.94	125	117	91	99	9.6	191	12.1	137	3.6	242	8	0.9	297.502	7.03	2	19	2	29	20	15	1	0	1	0	0	0	0	0	0	0	0	0	0	0	0	5831.13	3.09	2.58	0
49	2	36.33	90	138	92	97	8.8	140	15.5	137	3.7	219	11	0.9	297.495	7.43	1	10	1	31	16	15	1	1	0	0	0	0	0	0	0	0	1	3	0	0	0	3992.67	8.18	7.08	0
24	1	37.33	118	141	96	100	12.2	488	9.9	137	3.5	206	14	0.6	297.444	7.55	3.9	23	0	33	16	15	2	0	1	0	0	0	0	0	0	0	0	0	0	0	0	3559.96	7.56	1.85	0
66	1	36.78	96	180	160	98	16.4	360	8.6	138	4	139	16	1.1	297.437	7.33	1.2	23	2	33	21	15	6	0	1	0	0	0	1	0	0	0	0	0	0	0	0	1444.21	12.2	2.02	0
29	2	37.17	109	134	55	99	11.6	252	13.8	137	4.4	216	7	0.9	297.3	7.25	0.7	19	0	24	13	15	2	0	1	0	0	0	0	0	0	0	0	0	0	0	1	2940.96	2.48	1.44	0
44	2	37.89	131	128	76	96	6.9	259	14.7	137	3.9	176	16	1.1	297.292	7.35	1.7	21	1	33	20	15	6	0	1	0	1	0	0	0	0	0	1	2	0	0	1	3735.07	2.98	2.95	0
77	2	37	80	163	80	100	17.8	245	11.6	133	4.3	93	49	1.3	297.267	7.49	2.17526	14	3	53	44	13	7	1	0	1	0	0	0	1	0	1	0	0	0	0	1	3025.19	7.97	1.03	0
38	1	36.5	89	153	104	97	4.7	176	12.1	137	3.3	203	15	0.6	297.235	7.41	3	18	2	32	15	15	1	0	1	0	1	0	0	0	0	0	0	0	0	0	1	1728.67	2.05	1.51	1
21	1	36.83	126	124	75	97	13.4	421	14.4	135	4.7	269	8	0.8	297.202	7.22	3.15986	25	2	46	20	15	1	0	1	0	0	0	0	0	0	0	0	0	0	0	0	551.19	3.12	2.37	0
25	2	36.11	108	130	90	100	6.9	251	10.5	140	2.8	183	4	0.6	297.195	7.52	2.2	12	3	30	18	15	1	0	1	0	0	0	0	0	0	0	0	0	0	1	0	2784.97	7.62	4.7	0
63	1	37.06	106	112	56	93	10.1	193	11.8	134	3.6	125	42	1.9	297.144	7.3639	1.5	13	3	55	29	15	8	1	0	1	0	1	0	0	0	1	1	1	0	0	0	49.67	4.45	1.47	1
46	2	36.39	83	138	85	96	5	185	12.8	137	3.5	239	8	0.6	297.135	7.38	1	17	0	18	18	15	2	1	0	0	0	1	0	0	0	0	0	0	0	0	1	615.34	6.18	1.79	0
50	2	36.72	70	147	87	97	8.4	147	11.5	135	4	235	17	0.6	297.127	7.34996	1.827	12	1	30	15	15	2	0	0	0	1	0	0	0	0	0	0	0	0	0	1	2544.86	8.87	3.02	1
44	1	36.67	80	128	57	93	20.4	265	7.9	131	3.9	176	49	5.5	297.078	7.28258	2.05334	15	4	58	40	15	6	0	1	1	0	1	0	1	0	0	1	3	0	0	1	6684.55	22.62	1.08	0
79	1	37.39	107	160	60	100	31.3	291	10.2	132	3.3	303	27	0.7	297.076	7.33	3	15	4	42	41	15	6	0	0	1	1	0	0	0	1	0	1	2	0	1	1	4256.74	14.16	3.27	1
46	2	36	86	134	80	91	7.1	125	12	138	3.3	164	15	0.7	297.068	7.32	0.9	14	1	27	18	15	0	0	1	0	0	0	0	0	0	0	0	0	0	0	1	2346.41	4.45	1.96	0
45	1	37.06	90	99	66	97	9.7	537	10.3	133	3.4	301	21	0.8	297.022	7.35837	2.79085	22	1	45	18	15	2	0	1	0	0	0	0	0	0	0	0	0	0	0	1	4879.71	1.96	1.01	0
56	2	37.06	110	122	81	95	11.4	154	13.3	135	4.2	244	14	0.9	296.956	7.36	2.1	18	0	27	18	15	2	0	1	0	0	0	0	0	0	0	0	0	0	0	1	4291.39	3.88	1.7	0
30	2	36.17	113	143	79	99	11.5	248	11.3	139	3.8	127	12	0.8	296.941	7.32109	1.63095	7	0	33	6	15	4	0	1	0	0	0	0	0	0	0	0	0	0	0	0	1468.96	3.35	1.51	0
58	2	36.56	99	140	79	97	9.4	254	13.2	135	3.9	234	17	0.9	296.871	7.31	2.4	11	0	21	27	15	7	0	0	0	0	0	0	0	0	0	0	0	0	0	0	2307.88	5.13	2.86	0
39	1	36.72	80	122	65	100	8.5	330	6.2	132	5.4	69	51	1.6	296.848	7.27	1.5	14	3	52	23	14	6	0	1	1	0	1	0	0	0	1	0	0	0	0	1	1463.4	13.89	2.17	1
45	2	36.67	129	164	97	100	13.7	150	14.7	136	5.3	165	14	1.1	296.767	7.04	1.3	30	1	35	25	15	1	1	0	0	1	0	0	0	0	0	0	0	0	0	0	6616.19	2.66	1.53	0
51	1	37.06	105	135	65	100	10.9	301	9.8	134	4.7	310	6	0.7	296.765	7.19	1.1	26	2	28	23	14	1	0	1	1	0	0	0	0	0	0	1	1	0	0	0	2891.87	3.56	2.57	0
38	1	37	83	96	54	96	7.6	268	9.8	135	4.6	213	16	0.9	296.748	7.33717	0.8	12	1	35	13	15	3	0	1	0	0	0	0	0	0	0	0	0	0	0	1	2009.87	8.4	1.95	0
42	1	36.89	113	113	74	98	18.7	314	11.5	140	3	129	10	0.7	296.738	7.28	1.3	20	2	31	26	14	3	0	1	1	0	0	0	0	0	0	0	0	0	0	0	-59.98	4.88	2.02	0
70	1	36.83	107	179	80	100	10.5	185	11.2	138	3.4	186	10	0.7	296.705	7.37	2.4	19	0	32	26	15	2	0	1	0	1	0	0	0	0	0	0	0	0	0	1	1114.66	3.81	1.62	0
50	1	36.94	106	113	49	98	15.5	294	12.3	136	4.2	184	17	0.7	296.694	7.33068	2.18245	15	2	48	21	15	3	0	1	0	1	0	0	0	0	0	0	0	0	0	1	2219.31	1.53	1.48	0
48	1	36.72	73	144	74	100	5.6	240	11.7	135	3.8	260	13	0.9	296.687	7.39	1.74576	14	2	25	20	15	1	1	0	0	0	0	0	0	0	0	1	3	0	0	1	2462.66	4.22	1.39	0
43	1	36.83	102	111	68	100	17.2	132	8.5	140	3.9	102	9	1	296.681	7.16	1	26	5	44	32	14	6	0	0	0	0	0	0	0	0	0	0	0	0	0	0	3211.12	4.81	1.93	0
76	1	35.83	75	148	80	94	10	285	10.8	130	4.2	373	21	0.9	296.622	7.35	2.6	14	1	43	43	15	10	1	0	0	1	0	0	1	0	0	1	2	0	0	0	2059.08	5.29	3.09	1
69	1	36.61	81	122	66	94	4.1	287	9.7	139	4.3	115	10	0.6	296.56	7.36164	1.41367	13	0	20	23	15	6	0	1	0	0	0	0	0	0	0	0	0	0	0	0	955.31	3.82	1.72	0
51	1	37.22	122	150	137	72	3.8	84	9.6	131	3.5	154	53	2.2	296.484	7.27	2.4	21	7	49	36	15	5	0	1	1	0	0	0	0	0	1	1	1	0	0	1	4545.82	28.13	3.77	1
72	2	36.67	109	197	139	100	14.5	268	13.3	134	4	233	21	1.9	296.444	7.32165	2.80773	13	3	65	40	15	8	1	0	0	0	0	0	0	0	1	1	3	0	0	1	5668.19	4.74	1.84	0
35	2	37.22	100	123	79	95	3.5	165	12.9	135	5.5	226	8	0.8	296.413	7.44	4	20	2	20	14	15	3	0	1	0	0	0	0	0	0	0	0	0	0	0	0	1885	7.38	1.02	0
53	2	37.17	94	110	61	98	8.2	81	9.7	133	4.7	203	27	1.4	296.321	7.32334	2.24515	17	5	43	27	15	9	0	1	0	0	0	0	0	0	0	1	1	0	0	1	4656.65	1.64	1.59	1
30	1	36.5	116	149	99	100	13.3	212	13.9	137	4.5	207	5	0.7	296.286	7.14	1.5	13	1	38	11	15	0	0	1	0	0	0	0	0	0	0	0	0	0	0	1	4959.21	2.28	2.17	0
48	1	36.78	106	139	75	100	4.9	188	9.4	136	4.5	210	10	0.9	296.238	7.19	0.8	23	1	40	23	15	1	0	1	0	1	0	0	0	0	0	0	0	0	0	1	5228.68	4.06	2.99	0
20	1	37.06	104	107	66	99	7.7	234	11.7	137	3.6	219	8	0.7	296.224	7.21	2.6227	21	1	31	16	15	0	0	1	0	0	0	0	0	0	0	0	0	0	0	0	4308.28	3.08	1.95	0
35	1	37.06	122	174	105	100	15.6	284	9.3	137	3.3	178	16	1.1	296.203	7.4	0.8	16	2	38	18	13	4	0	1	0	0	0	0	0	0	1	0	0	0	0	1	3445.55	5.79	3.03	1
48	1	37.06	104	113	87	98	13.1	368	11.5	136	3.9	192	16	0.7	296.181	7.36	1.5	13	1	26	21	14	2	1	0	0	1	0	0	0	1	0	0	0	0	0	1	6314.14	10.01	1.79	0
28	2	36.56	83	148	87	99	5.1	147	12.9	137	3.6	242	4	0.9	296.073	7.25	0.9	25	2	27	18	15	0	0	1	0	0	0	0	0	0	0	0	0	0	0	1	3093.55	2.91	1.1	0
55	1	36.83	101	156	76	100	16.9	179	8.9	131	3.9	233	37	2.9	295.959	7.41	2.8	15	3	54	33	15	6	1	0	1	0	0	0	0	0	1	1	1	0	0	0	2973.77	14.58	1.78	0
26	1	36.56	116	111	86	99	8	170	9.9	134	5.1	268	8	0.9	295.946	7.23521	2.60584	24	1	43	14	15	2	0	1	0	0	0	0	0	0	0	0	0	0	0	0	3599.35	3.63	1.66	0
24	1	36.67	106	136	80	100	6.1	176	11.7	137	3.2	253	4	0.5	295.884	7.24	1.1	18	1	34	16	15	1	0	1	0	0	0	0	0	0	0	0	0	0	0	0	3427.53	4.71	1.75	0
61	1	36.61	95	130	68	91	22.6	265	11.8	135	4.4	166	22	0.9	295.879	7.3613	1.7	14	1	36	24	15	3	0	1	0	0	0	0	0	0	0	1	1	0	0	1	2721.04	4.85	1.69	0
21	1	36.78	115	109	53	100	15.4	227	10.4	136	4.6	204	9	0.7	295.748	7.19	1.8	20	1	41	16	15	0	0	1	0	0	0	0	0	0	0	0	0	0	0	0	4324.1	2.05	1.28	0
29	2	37.28	118	126	60	100	31.5	307	10.9	138	3.9	86	20	1.1	295.721	7.35	2.54332	22	2	40	18	14	0	0	1	0	0	0	0	0	0	0	0	0	0	0	0	2421.4	3.9	3.3	0
62	2	36.72	108	109	55	99	9	106	8.2	126	5	266	53	1.3	295.706	7.326	3.5	15	6	53	32	15	9	0	0	1	0	0	0	0	0	0	1	2	0	0	0	5384.19	5.91	2.06	1
39	1	36.61	76	111	70	99	8	281	11.2	132	3.5	303	22	0.7	295.69	7.33317	0.9	14	1	40	19	15	1	0	1	0	0	0	0	0	0	0	0	0	0	0	0	3079.82	3.9	2.03	0
78	2	37.33	80	141	61	94	10.3	82	9	125	4	394	44	1.6	295.603	7.43	0.73	16	5	54	31	14	6	0	0	1	1	1	0	0	0	0	0	0	0	0	1	4997.04	7.9	2.91	1
51	2	37.22	122	154	63	100	7.5	133	13.2	136	4.1	174	16	1.1	295.581	7.38	2	25	3	30	20	15	3	0	1	0	1	0	0	0	0	0	0	0	0	0	1	6186.8	3.85	1.78	0
29	1	36.83	108	115	82	100	8.2	324	12	135	4	284	5	0.5	295.563	7.2	0.8	10	0	30	19	15	0	0	1	0	0	0	0	0	0	0	1	1	0	0	1	4884.45	3.96	1.62	0
37	1	35.78	91	117	61	100	5.4	284	12.4	134	4.4	260	12	0.8	295.53	7.31627	1.68209	14	1	32	14	15	1	0	1	0	0	0	0	0	0	0	0	0	0	0	1	861.55	1.26	1.2	0
31	1	36.33	102	115	68	100	16.6	332	7.7	137	3.3	185	13	1.2	295.521	7.31	1.3	14	3	43	19	14	2	0	1	1	0	0	0	0	0	0	0	0	0	0	1	2280.93	7.35	1.08	0
59	2	37.17	130	105	83	94	16.6	183	15	128	6.9	315	23	1.5	295.514	7.21	2.6	20	5	49	30	14	2	1	0	1	1	0	0	0	0	0	1	2	0	0	0	6371.86	9.59	2.52	0
52	1	36.78	96	148	84	96	15.2	314	10.1	138	3.5	167	9	0.6	295.492	7.49	3.2	19	1	26	19	14	3	1	0	0	0	0	0	0	1	0	0	0	0	0	0	2483.93	3.89	1.8	0
55	2	36.94	120	104	78	95	15.8	329	11.9	135	4	205	17	0.8	295.46	7.45	1.5	12	1	61	22	15	3	1	0	0	1	0	0	0	0	0	0	0	0	0	1	2487.19	6.29	2.83	0
40	2	35.11	98	126	89	94	8.9	181	12.6	129	4.5	364	23	0.7	295.437	7.35	2.34218	15	0	37	6	15	3	0	1	0	0	0	0	0	0	0	0	0	0	0	0	21	4.84	3.62	1
32	2	37	113	166	102	96	9	280	10.5	136	3.9	216	10	0.1	295.371	7.32	3	13	2	41	10	15	1	0	1	0	1	0	0	0	0	0	1	3	0	0	0	3814.52	11.5	3.61	0
57	2	36.94	100	137	82	96	7.4	180	13.7	138	3.5	158	10	0.9	295.349	7.32	1.53622	19	1	32	23	15	2	1	0	0	1	0	0	0	0	0	1	1	0	0	1	3184.9	7.04	2.32	0
38	2	36.33	106	133	88	100	12.8	249	11.2	129	4.1	356	26	1.1	295.263	7.29	1.3	32	1	39	16	15	1	1	0	0	0	0	0	0	0	0	0	0	0	0	1	3132.48	3.57	1.82	0
21	2	36.94	73	113	76	99	5.3	192	12.8	139	3.3	132	9	0.8	295.148	7.31	1.4	12	2	27	21	14	1	0	1	0	0	0	0	0	0	0	0	0	0	0	1	2589.32	2.87	1.79	0
31	2	36	82	120	66	100	5.6	258	13.4	138	3.9	106	15	0.8	295.046	7.30449	1.15373	16	2	35	19	15	2	0	1	0	0	0	0	0	0	0	0	0	0	0	0	3167.51	1.89	1.83	0
49	2	36.5	86	111	71	100	10.2	267	8.9	138	4.2	114	12	0.7	295.019	7.38	1.6	11	4	25	22	15	1	0	1	0	1	0	1	1	0	0	1	1	0	1	0	1135.77	12.91	2.97	0
25	1	36.5	87	108	62	100	5.9	169	10.7	137	4	201	5	0.8	294.952	7.27	0.8	19	1	26	18	15	0	0	1	0	0	0	0	0	0	0	0	0	0	0	1	3006.6	2.43	1.21	0
42	1	36.94	94	128	61	96	21.2	412	8.1	138	3.8	120	13	0.6	294.91	7.34918	1.69375	13	1	29	26	15	1	0	0	0	1	0	0	0	0	0	1	2	0	0	0	4678.62	26.48	3.13	0
23	2	37	93	103	62	100	9.7	166	13.1	134	4	242	15	1	294.802	7.18	1	23	4	36	18	14	1	0	1	1	0	0	0	0	0	0	0	0	0	0	1	2893.39	2.58	1.31	0
37	2	36.67	96	129	72	97	6.3	149	13.8	138	3.1	117	17	1	294.771	7.36	1.3	16	5	49	13	15	2	1	0	0	0	0	0	0	0	0	0	0	0	0	1	2067.47	2.75	1.73	0
70	1	36.67	76	108	48	96	1.7	110	10.5	137	4.3	128	14	0.8	294.711	7.34	1.3	15	2	30	25	15	3	0	1	1	0	0	0	0	0	0	0	0	0	0	1	3702.87	10.35	2.18	0
19	1	36.44	110	116	67	99	7	267	12.8	133	3.9	305	11	0.9	294.673	7.29	2.08239	16	1	39	15	15	0	0	1	0	0	0	0	0	0	0	0	0	0	0	1	3344.6	2.93	1.08	0
48	1	37.5	140	213	100	98	12.3	234	10.9	137	4.1	147	12	0.7	294.652	7.36678	1.88873	13	1	47	22	15	2	0	1	0	1	0	0	0	0	0	0	0	0	0	0	1992.25	5.06	4.11	0
19	2	37.06	95	104	71	98	4.5	202	12.6	137	3	199	10	0.7	294.627	7.29	1.1862	14	1	33	18	15	0	0	1	0	0	0	0	0	0	0	0	0	0	0	0	3568.94	2.9	1.02	0
34	1	37.06	93	109	60	98	15.8	22	8.1	135	4.4	193	14	1.9	294.522	7.33	4.6	20	14	87	45	15	4	1	0	1	0	0	0	0	0	0	1	3	0	1	1	9021.36	18.98	6.37	1
27	1	36.5	83	127	67	100	16	315	11	132	4.7	328	8	0.6	294.479	7.33	1.2	13	1	27	18	15	1	0	1	0	0	0	0	0	0	0	0	0	0	0	1	2695.28	5.43	1.48	0
42	1	37.67	99	106	70	100	9.2	206	11.3	138	3.2	190	4	0.4	294.384	7.34787	1.12627	10	3	35	29	10	2	1	0	0	0	0	0	0	0	0	1	1	0	0	1	-1521.96	4.9	1.85	0
34	2	36.94	114	138	85	100	5.3	253	14	136	3.2	248	6	0.8	294.321	7.32767	1.62432	11	1	34	11	15	1	1	0	0	0	0	0	0	0	0	0	0	0	0	0	1342.96	1.57	1.55	0
20	1	36.61	131	126	68	91	15.3	277	9.7	133	4.4	227	19	1	294.197	7.23	0.8	15	2	48	23	15	1	0	1	0	0	0	0	0	0	0	0	0	0	0	0	3462.27	1.58	1.54	0
44	2	36.56	79	104	69	99	4.8	111	13.7	138	3.8	119	11	1.4	294.14	7.31	1.44001	23	2	20	18	15	1	1	0	0	1	0	0	0	0	0	0	0	0	0	0	2976.22	2.8	1.97	0
76	2	36.78	80	128	62	100	3.1	180	11.2	135	4.1	171	18	1.1	294.129	7.26	3.3	11	4	63	36	12	5	0	1	0	0	0	0	0	0	0	1	1	0	0	0	6325.48	11.49	3.54	0
61	2	37.06	88	154	90	98	8.4	209	12.7	135	3.4	247	10	0.8	294.094	7.31	0.8	19	0	23	42	15	9	1	0	0	0	0	0	0	0	0	0	0	0	0	1	1849.98	4.68	1.69	0
53	1	37.17	77	140	72	100	6.4	93	9	136	3.4	112	25	2.3	293.951	7.54	2.3	24	7	54	22	15	7	0	1	1	0	1	0	0	0	0	1	3	0	0	0	3644.51	11.79	3.24	1
23	2	36.61	129	138	67	96	9.3	243	12.2	133	5.4	199	17	1	293.927	7.08	1.7	24	2	51	23	15	1	0	1	0	0	0	0	0	0	0	0	0	0	0	0	5184.18	2.4	2.39	0
69	2	36.56	78	141	62	99	14.2	455	12.8	135	3.6	230	11	0.7	293.906	7.37516	1.95943	15	1	27	20	15	3	1	0	0	0	0	0	0	0	0	1	1	0	0	1	5465.11	3.82	2.2	0
25	1	36.61	128	136	99	100	5.4	178	10.5	137	4.1	152	9	0.8	293.859	7.11	2.6	21	3	30	20	15	0	0	1	0	0	0	0	0	0	0	0	0	0	0	0	3411.25	3.63	1.61	0
62	1	37.11	83	111	47	92	4.4	216	10.4	137	3.7	147	12	0.8	293.852	7.35	1.80333	13	1	23	26	15	3	1	0	0	1	0	0	0	0	0	1	2	0	0	1	2602.99	4.94	2.52	0
42	1	36.83	97	90	56	99	5.3	258	11.2	136	4.2	189	8	0.6	293.757	7.39	0.9	20	1	22	25	15	2	0	1	0	0	0	0	0	0	0	0	0	0	0	0	1937.86	2.96	2.03	0
45	1	36.89	72	117	61	97	5.7	249	8.5	136	3.2	197	12	0.7	293.63	7.36924	1.65153	14	1	33	25	15	1	1	0	0	0	0	0	0	0	0	0	0	0	0	0	2169.65	3.61	1.86	0
18	2	36.83	109	128	86	100	5.7	267	12.7	133	4.2	300	7	0.8	293.567	7.25	3.1	22	1	44	20	15	0	0	1	0	0	0	0	0	0	0	0	0	0	0	0	4389.83	2.63	1.76	0
55	2	36.94	83	124	47	96	9.3	212	11.9	122	2.9	607	28	1.7	293.522	7.36	1.7	17	3	38	34	14	8	1	0	1	1	1	0	0	1	1	1	2	0	0	0	4422.98	3.83	2.37	1
63	1	36.56	117	99	25	100	16.1	462	9.7	136	4.8	155	9	0.6	293.425	7.32	1.2	16	1	49	33	15	4	1	0	0	1	0	0	0	0	0	0	0	0	0	1	9823.93	6.89	2.74	0
22	2	36.94	120	112	66	100	14.7	266	13.8	135	4.5	221	6	0.8	293.421	7.29	3	25	3	41	20	14	0	0	1	0	0	0	0	0	0	0	0	0	0	0	0	3213.18	4.98	2.98	0
52	1	36.67	102	110	72	98	10.5	274	10	137	4.6	81	16	0.9	293.414	7.36	0.9	15	2	42	26	15	3	0	1	0	0	0	0	0	0	0	0	0	0	0	1	4869.88	5.76	3.03	1
34	1	37.22	80	171	79	96	13	404	11.6	138	3.8	157	3	0.7	293.394	7.33	2.71313	18	2	27	16	12	1	1	0	1	0	0	0	0	0	0	0	0	0	0	1	2987.36	15.11	2.15	0
28	2	37.11	100	126	71	100	7.4	263	12.1	126	4.4	487	15	1.3	293.213	7.33	1.1	20	2	36	16	15	0	0	1	0	0	0	0	0	0	0	0	0	0	0	1	2661.71	2.8	1.17	0
28	1	37	111	168	107	99	8.7	278	8.3	135	3.7	246	6	0.6	293.21	7.39	2.12393	11	0	31	15	15	2	0	1	0	0	0	0	0	0	0	0	0	0	0	0	3566.24	2.71	1.97	0
55	2	38.72	151	117	81	94	3.2	145	10.7	126	3	407	35	2.1	293.111	7.17	8.4	21	9	76	38	13	7	1	0	1	0	1	0	0	0	1	1	3	0	0	0	7376.91	15	4.17	0
54	1	37	101	119	67	95	16.7	254	7.5	134	4.1	258	7	0.5	293.033	7.31	1	15	0	27	26	15	5	0	1	0	1	0	0	0	0	0	1	1	0	0	1	2104.2	18.06	2.21	0
71	1	37.61	122	126	65	98	15.5	143	8.1	138	4.3	60	14	1.4	292.933	7.42	1	11	6	58	48	10	6	1	0	1	0	1	0	0	1	0	1	3	1	1	0	1850.93	49.17	49.17	1
24	2	36.33	104	148	80	100	11	263	14.4	128	6.9	300	18	1.4	292.895	7.06	3.4	29	2	32	21	15	1	0	1	0	0	0	0	0	0	0	0	0	0	0	0	3197.72	3.48	1.72	0
23	2	36.78	89	128	78	99	13.3	134	15.1	134	4	246	9	1	292.881	7.17	0.9	17	3	29	18	14	0	0	1	0	0	0	0	0	0	0	0	0	0	0	1	-2611.55	1.21	1.12	0
49	2	37.11	84	142	79	99	8.9	258	12.3	137	3.96744	151	7	0.7	292.824	7.34	0.9	9	1	30	25	15	1	1	0	0	0	0	0	0	0	0	1	2	0	0	0	2500.5	2.46	1.83	0
44	1	36.5	63	89	42	100	16.3	91	9.4	128	3.2	263	44	1.6	292.725	7.32	1.8	10	11	65	46	15	3	1	0	1	0	1	0	0	0	1	1	1	0	1	1	7581.51	47.01	6.06	1
54	1	36.83	95	106	64	90	10.3	250	12.6	137	4.2	88	15	0.8	292.646	7.32	1	11	1	39	25	15	2	1	0	1	1	0	0	0	0	0	1	3	0	1	0	3305.89	27.35	19.03	0
59	1	37	81	101	64	100	5.8	353	10.3	138	4	124	4	0.6	292.317	7.36543	3.1	11	2	31	25	13	4	0	1	0	0	0	0	0	0	0	0	0	0	0	0	2639.17	23.22	4.27	0
74	2	36.89	114	104	66	94	13.8	277	10.6	136	4.3	114	15	0.4	292.29	7.44	1	16	5	35	41	15	9	0	1	0	1	0	0	0	0	0	1	1	0	1	0	3328.73	7.04	6.98	0
74	1	37.06	88	126	34	96	10.2	252	7.8	130	3.6	309	22	1.4	292.224	7.41	2.2	10	3	48	46	13	12	1	0	1	0	0	1	0	1	0	1	2	0	0	1	1163.68	12.57	3.55	1
72	1	36.83	87	116	48	99	16	432	11.1	129	2.8	264	39	1.4	292.195	7.44	2.8	16	5	60	35	14	7	1	0	1	0	1	0	0	0	0	1	2	0	0	0	-1219	2.04	1.97	1
45	1	36.44	85	139	89	100	4.7	155	9.9	136	3.4	189	8	0.6	292.157	7.31	0.9	16	1	16	23	15	2	1	0	0	1	0	0	0	0	0	0	0	0	0	0	2506.25	2.87	2.74	0
57	1	36.39	107	157	98	100	17.4	281	12.4	129	3.9	313	25	1.5	292.117	7.35	2.6	16	1	52	16	15	5	1	0	0	0	0	0	0	0	1	1	2	0	0	1	4596.19	4.56	1.68	0
26	1	37.06	93	135	80	100	11.9	229	12.4	135	4.2	175	11	1	292.051	7.25	1.33194	15	1	37	9	14	1	0	1	0	0	0	0	0	0	0	0	0	0	0	1	5315.25	1.35	1.31	0
52	1	36.94	93	108	40	95	15.4	253	10.7	135	4.5	106	20	1.2	292.032	7.34106	1.4281	13	2	42	21	15	6	0	1	1	0	0	0	0	0	0	0	0	0	0	0	2930.57	5.78	2.71	1
27	1	36.94	104	112	62	99	16.1	244	11.3	137	4.3	92	12	0.8	291.997	7.28888	2.50803	13	1	33	14	15	1	0	1	0	0	0	0	0	0	0	0	0	0	0	0	1571.83	2.59	1.62	0
60	1	36.78	98	155	76	100	33.3	233	11.2	136	3.5	105	20	0.7	291.976	7.37	1.1	15	2	39	35	13	4	1	0	0	0	0	0	0	0	0	0	0	0	0	0	1874.67	10.92	2	0
53	1	36.83	115	145	72	100	4.6	252	10.9	134	3.9	252	6	0.7	291.943	7.25	1.4	20	0	27	18	15	4	0	1	0	0	0	0	0	0	0	0	0	0	0	1	4198.96	26.92	1.08	0
31	1	37.11	87	147	92	100	5.9	323	13.7	135	3.9	201	8	0.3	291.824	7.28	1.3	18	0	27	13	15	2	1	0	0	0	0	0	0	0	0	1	2	0	0	1	655.73	3.94	2	0
52	2	37.06	100	132	94	100	6.5	167	13.3	136	3.1	148	15	1.3	291.779	7.37	1.9	25	3	37	21	15	2	0	0	0	1	0	0	0	0	0	1	2	0	0	0	5349.78	4.65	2.58	0
25	1	36.5	95	104	67	100	6.2	222	13.1	136	3.9	144	11	0.7	291.729	7.15	2.42922	21	1	39	16	15	1	0	1	0	0	0	0	0	0	0	0	0	0	0	0	-134.25	1.13	1.09	0
39	1	37.39	78	111	53	100	4.2	192	5.7	132	3.9	146	33	5	291.697	7.08	0.7	16	7	74	31	15	1	0	1	1	0	0	0	0	0	0	1	3	0	0	1	11325.9	6.07	1.94	0
31	2	36.72	112	127	77	98	6.9	249	12	133	4.3	217	14	1.2	291.656	7.3	0.9	23	1	32	11	15	1	0	1	0	1	0	0	0	0	0	0	0	0	0	0	9425.4	3.1	1.11	0
22	1	36.89	89	125	84	100	5.6	200	12.3	135	3	247	5	0.8	291.508	7.28239	1.4	22	1	22	18	15	0	0	1	0	0	0	0	0	0	0	0	0	0	0	1	783.73	3.66	1.6	0
71	1	37.67	87	124	57	99	17.4	285	10.5	129	4.3	236	33	1.4	291.497	7.34	3	17	2	44	37	15	9	1	0	1	0	0	0	0	0	1	0	0	0	0	0	413	21.56	1.38	1
58	2	36.61	74	98	50	97	5	113	11.2	128	3.6	302	32	1.5	291.406	7.32	1.7	11	8	59	29	15	3	1	0	0	1	0	0	0	0	0	1	2	0	0	1	5826.48	2.23	2.15	1
21	1	36.72	88	105	64	100	5.5	198	11.9	134	4.7	193	9	0.9	291.337	7.25	1.78119	21	1	38	18	15	0	0	1	0	0	0	0	0	0	0	0	0	0	0	0	4051.03	1.55	1.5	0
50	2	38.11	88	156	100	97	9.9	234	13.4	134	3.3	234	10	1	291.171	7.35	1.86961	19	1	35	22	14	5	1	0	0	1	0	0	0	0	0	1	2	0	1	1	1459.28	9.01	3.11	0
59	1	37	86	117	62	99	11.4	199	12.9	135	3	208	10	0.9	291.127	7.28	1.5	21	1	24	26	15	1	0	1	0	1	0	0	0	0	0	0	0	0	0	0	3293.86	3.84	1.82	0
46	1	37.06	108	120	91	99	8.1	128	12.2	137	3.8	139	5	0.6	291.108	7.3576	1.54665	16	1	25	13	15	2	1	0	0	1	0	0	0	0	0	0	0	0	0	1	3395.63	5.6	1.08	0
60	1	36.78	101	76	51	96	13.1	196	9.7	129	4.1	294	24	1.2	291.105	7.26	1.3	15	5	46	28	14	2	1	0	1	1	0	0	0	0	0	0	0	0	1	1	4174.11	5.87	2.02	0
38	2	37.56	115	131	79	93	8.3	230	9.7	132	3.5	238	19	1.8	291.008	7.46	2.9	18	6	84	30	15	2	1	0	1	1	1	0	0	0	0	1	3	1	1	0	6345.17	21.11	17.22	0
35	1	36.72	60	121	70	99	9.6	198	11	134	4.8	155	13	0.7	290.854	7.29	0.9	9	7	51	30	15	0	0	1	0	0	0	0	0	0	0	0	0	0	0	1	3104.13	2.09	1.01	0
21	2	36.56	85	116	64	100	13.3	294	13.2	134	4.4	193	9	0.8	290.737	7.27	1.1	18	1	38	20	15	1	0	1	0	0	0	0	0	0	0	1	1	0	0	1	2594.12	5.13	1.27	0
22	2	37.89	105	108	40	100	4.4	209	12.7	133	4.3	225	10	1	290.671	7.36	1	15	2	53	18	15	1	0	1	0	0	0	0	0	0	0	0	0	0	0	1	-1898.21	3.34	1.23	0
31	1	37.28	108	139	83	100	7.4	176	11.1	136	3.7	151	8	0.7	290.646	7.39	1.4	14	1	28	14	15	0	0	1	0	0	0	0	0	0	0	0	0	0	0	0	2993.16	2.98	1.33	0
48	1	37.11	109	114	80	97	9.3	199	11.5	134	3.9	182	13	0.7	290.554	7.39	1.34714	16	1	33	21	15	1	1	0	0	1	0	0	0	0	0	1	1	0	0	1	2194.91	3.05	1.41	0
53	2	37.06	117	107	85	90	8.3	182	13.4	135	3.7	121	18	1.1	290.551	7.49	1.8	17	4	53	22	15	4	1	0	1	0	1	0	0	0	0	1	2	0	0	0	4132.46	15.67	12.38	0
57	2	36.56	134	161	112	100	6.5	60	10	131	4.6	225	19	1.4	290.486	7.39	1.2	13	5	52	26	15	10	1	0	1	1	0	0	0	0	0	0	0	0	0	1	4783.22	15.94	2.99	1
25	1	37.06	105	102	61	98	6.8	305	13.7	134	3.8	197	11	0.6	290.473	7.32977	1.12341	12	1	18	11	15	2	0	1	0	0	0	0	0	0	0	0	0	0	0	1	1713.23	1.17	1.1	0
24	1	36.56	123	156	101	97	6.6	272	13.3	136	3.5	153	8	0.6	290.357	7.2556	2.04153	22	1	31	13	15	1	0	1	0	0	0	0	0	0	0	0	0	0	0	0	592.86	3.61	1.54	0
65	1	36.56	93	155	86	96	6.5	258	10	125	4.3	416	24	1.3	290.283	7.38	3.2	17	3	47	37	13	8	1	0	1	0	1	0	0	0	1	1	2	0	0	1	1212.82	4.61	1.97	0
35	2	36.5	77	138	76	96	9.4	265	14.1	134	4.3	188	9	0.8	290.259	7.41	1	10	1	28	13	15	2	0	1	0	1	0	0	0	0	0	0	0	0	0	1	2310.57	8.54	1.38	0
56	2	36.78	91	168	86	100	7.6	151	12.9	131	4	229	21	1	290.222	7.31071	1.2	18	1	29	18	15	3	0	1	0	1	0	0	0	0	0	0	0	0	0	0	7751.28	1.39	1.34	0
23	1	37.11	102	102	61	98	6.3	366	10.6	134	3.6	172	15	0.7	290.113	7.32954	0.978464	15	2	34	14	14	3	0	1	1	0	0	0	0	0	0	0	0	0	0	1	4568.38	2.98	1.03	0
58	1	38.33	105	118	74	100	11.8	57	9.8	133	4.4	146	20	0.9	290.054	7.28	4.6	19	7	47	30	14	4	1	0	1	1	0	0	0	1	0	1	1	0	0	1	5702.29	8.21	3.05	0
43	1	36.83	99	99	50	100	21.1	252	7.7	130	3.4	315	16	0.9	290.014	7.3	2	17	2	54	31	14	2	1	0	1	0	0	0	0	0	0	1	2	0	0	0	6570.86	38.6	3.9	0
49	2	36.28	102	130	68	100	8.7	176	10.6	116	4.8	550	50	2.4	290.013	7.31	2.3	24	12	96	60	13	4	1	0	1	1	0	0	0	0	0	1	2	0	1	1	8037.39	11.41	7.56	1
33	1	37.28	116	99	55	100	13.1	221	9.3	136	4.1	124	8	0.6	289.946	7.34	0.6	16	1	46	16	15	2	0	1	0	0	0	0	0	0	0	0	0	0	0	0	1878.75	6.61	2.6	0
28	1	36.61	107	107	72	98	5.4	237.096	11.2	137	4.6	75	7	0.4	289.867	7.35	0.978747	10	1	33	15	14	1	0	1	0	0	0	0	0	0	0	0	0	0	0	1	2827.07	6.82	1.58	0
43	2	36.89	124	171	105	100	21.2	385	17.4	132	5.5	155	17	1.1	289.683	7.03	1.5	31	1	36	28	15	1	0	0	0	1	0	0	0	0	0	0	0	0	0	1	5352.74	4.43	3.61	0
47	2	36.94	109	125	79	96	8.1	328	11.6	135	3.7	98	19	1.1	289.63	7.4	1.1	20	2	53	24	15	1	1	0	0	0	0	0	0	0	0	1	2	0	0	0	6159.11	5.69	1.84	1
43	2	36.33	100	123	78	97	29.3	639	7.9	132	3.9	132	29	1.8	289.49	7.3	1	16	1	33	29	15	5	0	1	0	0	0	0	0	0	0	0	0	0	0	0	943.1	13.88	2.79	0
49	2	37.33	80	113	57	99	6.4	193	11.9	135	3.9	159	8	1	289.49	7.36	1.2	24	1	30	25	15	1	1	0	0	0	0	0	0	0	0	0	0	0	0	1	3671.35	3.67	2.84	0
46	1	36.89	131	117	58	100	13.6	220	12.8	125	3.6	353	35	1.1	289.311	7.22	1.5	21	3	46	37	15	1	1	0	1	0	0	0	0	0	0	0	0	0	1	0	17245.7	11.07	4.6	1
71	1	37	115	91	56	98	11.8	227	11.2	131	4.2	184	24	0.8	289.194	7.37	2	19	3	65	49	12	7	1	0	1	1	1	0	1	0	0	1	2	0	0	1	2461.67	13.53	1.33	1
53	2	36.78	87	135	66	99	15	302	10.2	130	5	228	18	1.3	289.095	7.36	1.1	12	1	32	19	15	2	0	0	0	1	0	0	0	0	0	0	0	0	0	1	1332.4	2.63	1.03	0
55	2	36.56	88	132	64	100	7.6	243	11.3	132	4	224	13	0.8	289.087	7.26	1.8	25	5	26	31	14	4	0	1	0	0	0	0	0	0	0	1	1	0	0	1	8372.71	7.59	1.7	0
33	2	37.33	84	105	68	99	6.3	196	10.4	132	3.7	226	14	0.7	288.956	7.38	0.7	11	1	34	13	15	4	0	1	0	0	0	0	0	0	0	0	0	0	0	1	1892.46	3.18	1.07	0
33	2	36.72	109	162	115	97	9.2	138	12.9	134	3.8	201	6	0.9	288.91	7.26	1.1	18	1	31	11	15	1	1	0	0	1	0	0	0	0	0	0	0	0	0	0	3856.21	3.42	1.3	0
58	1	36.67	73	125	46	100	9.9	266	9.2	137	4.1	37	13	0.8	288.898	7.32	0.9	21	1	31	23	15	4	0	1	0	1	0	0	0	0	0	0	0	0	0	1	2880.16	4.15	1.2	0
26	2	37.78	100	133	85	98	11.1	219	13.8	132	3.7	289	4	0.6	288.884	7.31858	1.8	15	0	20	6	15	3	1	0	0	1	0	0	0	0	0	0	0	0	0	0	2771.55	4.74	3.75	0
49	2	36.56	98	132	84	95	8	206	11.1	135	3.4	152	10	0.4	288.816	7.41	1.37141	13	1	40	21	15	2	1	0	0	1	0	0	0	0	0	1	2	0	0	1	2645.32	3.06	1.31	0
67	2	36.78	77	156	51	98	13.6	161	14.3	132	3.2	266	10	0.8	288.749	7.41	1.3	16	3	34	28	11	4	1	0	0	0	0	0	1	0	0	1	1	0	0	1	-1614.73	4.73	1.08	0
48	2	37.83	111	142	86	98	19.4	176	11.6	131	4.2	225	16	1.1	288.614	7.33	3.8	16	2	40	21	15	2	1	0	0	1	0	0	0	0	0	0	0	0	0	0	6282.19	7.03	2.22	0
25	2	36.22	107	132	78	95	8.9	394	14.9	134	4	155	11	0.6	288.54	7.28757	1.78258	22	1	32	14	15	1	0	1	0	1	0	0	0	0	0	1	2	0	0	1	146.1	3.46	1.37	0
55	1	36.67	99	132	74	94	2.1	35	10.5	132	3.2	267	9	0.9	288.448	7.34	2.6	9	7	53	13	15	7	0	0	0	0	0	0	0	0	0	1	2	0	0	0	4528.16	3.24	1.2	1
23	2	36.72	125	179	101	100	13.5	291	12.6392	129	4.8	284	14	1	288.378	7.04	1.7	30	1	38	18	15	2	1	0	0	1	0	0	0	0	0	1	2	0	0	0	5482.36	4.85	4.8	0
71	1	36.5	102	83	45	98	11.6	196	9.4	132	4.3	155	20	4.2	288.354	7.26	6.4	20	9	66	44	13	10	1	0	1	0	1	0	0	0	1	1	3	0	0	1	4613.88	3.74	2.04	1
23	2	36.83	107	117	69	99	9.5	237	11	131	5.3	230	8	0.9	288.235	7.37	4.8	22	0	24	12	15	1	0	1	0	0	0	0	0	0	0	0	0	0	0	0	-384.97	1.63	1.19	0
68	2	36.61	97	130	62	96	11.8	181	17.3	131	4.9	192	16	0.8	288.181	7.35	2	10	2	41	34	15	6	1	0	0	1	0	0	0	1	0	1	3	0	0	1	3807.46	2.31	1.33	0
21	1	36.89	90	108	69	100	4.2	201	10.9	132	2.9	297	5	0.6	288.086	7.28	1.1	18	1	37	17	15	0	0	1	0	0	0	0	0	0	0	0	0	0	0	0	3946.21	2.9	1.43	0
38	1	36.61	111	148	99	97	3.6	160	11.4	136	3.2	140	5	0.7	287.963	7.27671	1.63049	21	0	42	13	15	2	1	0	0	1	0	0	0	0	0	0	0	0	0	1	-314.75	2.02	1.02	0
22	1	36.56	82	125	62	98	7	310	12	133	2.9	265	4	0.7	287.951	7.38	0.7	19	1	29	19	15	1	1	0	0	0	0	0	0	0	0	0	0	0	0	1	1969.68	2.52	2.46	0
63	1	36.94	85	115	68	98	23.4	375	10.5	130	3.8	267	15	0.6	287.79	7.32	1.3	16	0	26	26	15	4	1	0	0	1	0	0	0	0	0	0	0	0	0	1	3461.41	10.55	1.3	0
56	1	38.28	121	134	85	93	5.1	125	10.5	133	2.9	256	4	0.6	287.451	7.45	0.8	14	4	60	33	6	2	1	0	0	0	0	0	1	0	0	0	0	0	0	0	3461.98	16.01	3.79	0
20	2	36.67	114	153	65	100	21.6	177	16.6	131	4.2	223	13	1	287.432	6.95	2.7	22	3	46	23	13	0	0	1	0	0	0	0	0	0	0	0	0	0	0	1	2692.82	6.23	2.36	0
75	1	36.61	109	91	52	99	5.9	211	10.2	132	3.8	219	10	1.1	287.338	7.42	2.9	11	2	37	26	14	8	1	0	0	0	1	0	0	0	0	0	0	0	0	0	2258.06	28.64	1.53	0
24	1	38.33	91	91	70	94	2.8	180	11.9	133	3.4	215	7	0.5	287.244	7.41	0.968893	12	1	43	16	15	1	0	1	0	0	0	0	0	0	0	0	0	0	0	1	2191.55	2.63	1.71	0
25	2	36.11	96	148	62	100	11	235	14	130	3.3	293	12	0.9	287.163	7.2976	1.3	22	2	39	16	14	2	1	0	0	0	0	0	0	0	0	0	0	0	0	0	2317.16	6.63	2.68	0
43	1	37	104	157	85	100	6.4	140	10.9	131	4.2	269	5	0.5	287.13	7.4	1.1	16	1	28	18	15	0	0	1	0	1	0	0	0	0	0	0	0	0	0	1	3282.17	2.5	1.71	0
24	2	36.89	97	120	104	98	6	181	13.4	136	3	104	9	0.8	286.992	7.25714	1.64762	18	1	34	21	15	1	0	1	0	0	0	0	0	0	0	0	0	0	0	1	2355.33	2.97	2.13	0
61	2	37.28	95	125	55	91	21.1	186	7.9	121	6.4	178	62	4.2	286.832	7.22	1.8	18	9	70	48	13	10	0	1	1	0	1	1	0	0	0	1	3	0	1	1	5599.47	21.81	4.95	1
32	1	36.61	94	125	89	94	5.3	333	12.3	134	3.9	138	9	0.9	286.681	7.2	0.9	20	1	25	19	15	1	1	0	0	0	0	0	0	0	0	0	0	0	0	0	3857.7	3.55	1.49	0
37	2	36.28	106	144	74	100	4.7	131	10.8	134	2.9	154	12	0.9	286.641	7.05	1.5	23	1	30	18	15	1	0	1	0	0	0	0	0	0	0	0	0	0	0	0	-1441.64	5.09	3.17	0
39	1	36.61	117	122	76	97	7	264	12.3	135	4	91	10	0.5	286.627	7.25978	1.29926	17	1	50	14	15	3	0	1	0	0	0	0	0	0	0	0	0	0	0	1	2898.13	3.09	1.42	0
21	2	36.33	93	111	56	100	8.7	177	15.5	133	3.3	185	10	0.7	286.449	7.30937	1.12177	10	1	31	11	15	1	0	1	0	0	0	0	0	0	0	0	0	0	0	1	671.36	3.04	2	0
21	1	36.83	100	107	58	100	8.6	241	13.1	135	3.8	101	9	0.6	286.425	7.26	1.2	14	1	42	16	15	1	0	1	0	0	0	0	0	0	0	0	0	0	0	1	4483.57	1.8	1.76	0
76	1	37.33	90	109	70	98	22.7	337	12	130	3.2	238	19	0.9	286.408	7.32	1.7	17	4	37	36	15	5	1	0	1	1	0	0	0	0	0	1	2	0	1	0	4310.59	13.66	9.7	0
41	1	37.89	103	120	80	96	11.8	438	8.5	131	3.9	206	14	1.2	286.244	7.37616	2.40255	16	2	43	18	15	2	1	0	1	1	0	0	0	0	0	0	0	0	0	0	-869.77	1.97	1.18	0
46	1	37	91	132	74	97	8	181	10.5	136	2.9	105	7	0.8	286.133	7.3	1	12	2	21	21	14	0	0	1	0	0	0	0	0	0	0	0	0	0	0	0	2543.6	2.21	2.18	0
23	2	36.67	125	177	89	99	24.2	362	18.2	129	3.7	257	18	1.2	286.106	7.25196	1.90129	26	3	49	18	14	1	0	1	0	0	0	0	0	0	0	0	0	0	0	1	2837.8	2.49	1.35	0
20	2	36.5	90	126	81	100	9.7	250	15	131	3.1	264	9	0.8	286.081	7.15	0.9	27	0	38	19	15	0	0	1	0	0	0	0	0	0	0	0	0	0	0	0	2724.81	4.78	3.7	0
27	1	36.78	110	108	78	100	5.4	296	11.3	134	4.1	117	8	0.8	285.557	7.36	1.2	19	0	33	13	15	2	0	1	0	0	0	0	0	0	0	0	0	0	0	1	4095.96	2.89	1.22	0
19	1	36.94	92	113	66	99	7.8	273	14.1	131	3.6	217	12	0.6	285.541	7.29	1.19238	15	1	38	14	15	0	0	1	0	0	0	0	0	0	0	0	0	0	0	0	3411.72	2.18	1.23	0
41	2	39.28	128	107	65	90	8.5	139	11.3	130	3.3	287	8	0.8	285.402	7.44	1.9	20	9	70	47	15	3	1	0	1	1	0	0	0	0	0	1	2	0	1	0	9815	4.6	3.36	0
62	2	37.17	72	114	45	100	10.7	213	10.1	125	4.2	344	22	1.5	285.368	7.31	1.3	13	10	76	48	15	7	1	0	1	0	0	0	1	0	1	1	3	0	1	1	14583.1	13.93	13.99	1
39	1	36.56	100	126	78	100	7	196	10.2	132	4.8	170	6	0.6	285.187	7.32326	1.55076	17	0	25	19	15	1	0	1	0	0	0	0	0	0	0	0	0	0	0	1	3666.09	2.68	1.62	0
23	1	36.94	86	118	70	100	6.3	193	11.2	135	3.6	96	7	0.6	285.033	7.34	0.8	13	2	37	14	14	2	0	1	1	0	0	0	0	0	0	0	0	0	0	1	526	4.18	2.24	0
49	2	36.94	91	144	89	97	11.2	213	15.1	133	3	159	10	1	284.405	7.42	1.2	23	1	20	19	15	1	0	0	0	1	0	0	0	0	0	0	0	0	0	1	3476.7	5.68	1.91	0
24	2	37.61	135	133	66	96	8.1	122	7.2	131	3.5	232	7	0.8	284.389	7.17	1.78505	21	3	49	26	14	1	1	0	1	0	0	0	0	0	0	0	0	0	0	0	3698.75	6.93	3.63	0
72	1	36.33	62	115	41	100	7.1	222	7.9	130	3.4	142	27	6.2	284.332	7.35	1.3	17	6	55	50	13	10	1	0	1	0	1	0	0	1	0	1	3	0	0	0	1194.54	34.89	2.13	1
74	2	36.67	67	127	48	100	6	53	7.4	132	4.1	120	15	1.2	284.224	7.4	1.6	12	7	46	37	15	12	0	0	0	0	0	0	0	1	0	1	3	0	0	1	3335.59	7.65	4.56	1
55	1	37	115	127	83	99	22.8	315	8.2	122	3.6	335	40	2.1	284.097	7.37	2	17	7	65	43	9	5	1	0	1	0	0	0	0	0	1	1	2	0	1	0	3568.81	12.35	2.39	0
37	2	36.67	82	136	85	100	8.8	202	14.9	132	3.9	192	4	0.7	283.895	7.26	1.6	22	1	41	18	15	1	0	0	0	0	0	0	0	0	0	0	0	0	0	0	3929.74	3.88	1.83	0
48	2	36.94	114	140	83	94	6.3	182	13.5	129	4.3	256	8	0.7	283.679	7.37	1.3	5	1	19	16	14	1	1	0	0	0	0	0	0	0	0	0	0	0	0	0	7167.97	4.94	4.01	0
55	2	36.89	105	107	63	95	8.7	188	11.1	129	4.1	205	17	0.6	283.66	7.39	1.3	17	2	27	18	15	2	1	0	0	1	0	0	0	0	0	1	1	0	0	0	324.92	5.43	1.99	0
30	1	36.67	89	91	57	100	7	213	10.7	133	3.5	152	6	0.5	283.587	7.3	1	9	1	30	27	15	1	0	1	0	0	0	0	0	0	0	1	2	0	0	0	2802.22	2.31	1.32	1
23	1	36.72	97	116	77	100	9.5	305	11.1	133	4.3	123	6	0.6	283.576	7.27	3.38755	23	0	25	11	15	1	0	1	0	0	0	0	0	0	0	0	0	0	0	0	3379.85	1.3	1.24	0
30	1	36.67	81	112	85	97	6.2	144	14.9	133	4.3	132	3	0.6	283.005	7.32	1.3	24	2	25	13	15	2	0	1	0	0	0	0	0	0	0	0	0	0	0	1	2787.78	8.64	1.67	0
40	2	36.72	107	135	73	98	9.9	130	11.6	130	3.3	233	9	0.8	282.759	7.45	1.50671	15	3	33	16	14	2	1	0	0	0	0	0	0	0	0	1	2	0	0	1	2844	9.22	1.41	0
47	1	37.56	97	125	72	99	2.7	217	10	133	3.6	158	2	0.7	282.692	7.29	1.13474	20	0	26	18	15	1	1	0	0	1	0	0	0	0	0	0	0	0	0	1	1228.6	4.71	1.46	0
40	1	36.61	85	139	89	99	11.8	220	13.4	134	2.7	139	4	0.7	282.551	7.3	1.53876	19	2	24	21	15	2	0	0	0	0	0	0	0	0	0	0	0	0	0	1	2771.16	3.98	1.07	0
22	1	37	111	124	60	99	7.2	119	11.7	130	5	170	7	0.7	281.944	7.25	1.1	20	2	39	23	15	0	0	1	0	0	0	0	0	0	0	0	0	0	0	0	3893.75	1.68	1.63	0
25	1	36.78	101	124	81	100	20	455	10.8	130	3.1	225	9	0.5	281.914	7.3	2.76887	18	1	35	23	14	1	0	1	0	0	0	0	0	0	0	0	0	0	0	0	1690.02	4.1	1.67	0
30	1	37.06	105	134	74	100	8.7	322	12.7	131	3.3	193	7	0.7	281.822	7.38	0.8	15	1	27	9	15	2	0	1	0	0	0	0	0	0	0	1	1	0	0	1	2115.3	7.71	1.07	0
36	2	36.78	104	150	87	97	12	95	11	129	4	207	12	0.9	281.786	7.32457	1.2	11	2	32	8	15	1	1	0	1	0	0	0	0	0	0	1	2	0	0	0	3237.33	11.02	2.96	0
35	2	36.33	94	141	89	98	10.9	264	13.1	128	4.6	222	11	0.9	281.462	7.19	1.2	32	2	39	19	15	1	0	0	0	0	0	0	0	0	0	0	0	0	0	0	8785.46	3.88	3.88	0
39	2	36.89	84	152	87	96	3.2	48	12.7	132	3.3	119	11	0.8	281.14	7.41	1.6	16	11	60	28	14	3	0	0	1	0	0	0	0	0	0	1	2	0	1	0	4741.67	10.82	7.12	0
55	1	36.89	113	121	83	95	7.1	276	11.7	128	5	199	11	0.7	280.984	7.27	1.4	22	0	32	30	15	4	1	0	0	1	0	0	0	0	0	0	0	0	0	0	4213.07	10.84	2.68	0
30	1	37.44	123	142	94	100	7	134	10.6	131	4	152	7	1.2	280.944	7.22	7.7	17	5	53	26	15	2	1	0	1	0	1	0	0	0	0	1	3	0	1	1	4212.65	33.56	13.35	0
56	2	37.17	92	110	56	99	6.5	77	10.5	133	3	98	8	0.8	280.302	7.46	2.2	14	5	36	26	15	3	0	1	0	1	0	0	0	0	0	0	0	0	0	1	3814.64	2.61	1.58	0
58	1	37.28	132	164	79	96	19.5	207	7.5	121	4.2	416	17	1.6	279.583	7.23	4.2	18	10	76	44	11	6	1	0	1	0	1	1	0	0	0	1	3	0	1	1	5879.51	74.58	8.58	0
40	1	37.06	98	140	74	97	12.4	417	10.3	128	4.1	229	3	0.5	277.994	7.36	0.8	16	0	25	9	15	1	1	0	0	1	0	0	0	0	0	1	1	0	0	1	56.38	2.52	2.53	0
48	2	36.22	122	147	95	100	11.2	247	11.7	128	4.5	173	8	0.9	277.468	7.43	3.9	30	1	58	22	14	1	1	0	0	1	0	0	0	0	0	0	0	0	0	1	4742.8	5.46	3.56	1
35	1	37.06	111	125	78	100	5.8	153	9.6	130	3.9	120	6	0.4	276.61	7.22874	1.6	21	2	41	16	15	1	0	1	0	0	0	0	0	0	0	0	0	0	0	0	3359.18	5.75	2.67	0
55	2	37.06	84	140	94	96	7.5	154	9	127	2.3	205	7	0.6	272.489	7.52	1.5	13	2	38	22	15	2	1	0	1	1	0	0	0	0	0	0	0	0	0	0	-3536.47	4.85	2.85	0
53	2	38.33	104	105	65	96	11.6	362	8.4	124	3.6	203	8	0.5	269.335	7.43	0.9	9	5	58	37	15	4	1	0	1	1	0	0	0	0	0	1	2	0	0	0	3823.3	7.88	2.33	0
54	2	36.61	97	111	80	100	6.8	110	6.4	120	4.6	276	8	0.7	267.39	7.37	5.7	19	4	36	29	15	5	0	0	1	0	0	0	0	0	0	1	1	0	0	0	1185	8.02	1.63	0
